# Supplementary material
Source: PubMed Central journal article supplement (PMC3240716)
Supplement: NIHMS339903-supplement-1_si_001.pdf [file NIHMS339903-supplement-1_si_001.pdf]

# Supporting Information

## SAR studies of sulfonylpiperazine analogs as novel negative allosteric modulators of human neuronal nicotinic receptors

Brandon J. Henderson, Daniel J. Carper, Tatiana F. González-Cestari, Bitna Yi, Kiran Mahasenan, Ryan E. Pavlovicz, Martin L. Dalefield, Robert S. Coleman, Chenglong Li, and Dennis B. McKay\*

The Ohio State University, Division of Pharmacology, College of Pharmacy, 500 W 12<sup>th</sup> avenue, Columbus, OH 43210 (BJH, TFG, BY, MLD, DBM); The Ohio State University, Division of Medicinal Chemistry, College of Pharmacy (KM, CL); The Ohio State University, Biophysics Program (REP, CL); The Ohio State University, Department of Chemistry, 88 W 18<sup>th</sup> avenue, Columbus, OH 43210 (DJC, RSC).

## Table of Contents

|                                                     |         |
|-----------------------------------------------------|---------|
| General Procedures.....                             | S3-S4   |
| Experimental procedures for Scheme 2 analogs .....  | S4-S8   |
| Experimental procedures for Scheme 3 analogs.....   | S6-S9   |
| <sup>1</sup> H and <sup>13</sup> C NMR spectra..... | S10-S81 |

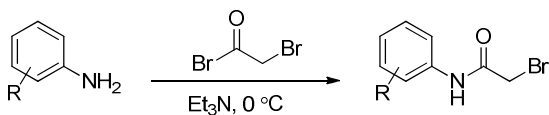

**General Procedure A:** Bromoacetyl bromide (10 mmol, 1 equiv) was added dropwise over 5 min to a solution of amine or alcohol (10 mmol, 1 equiv) and triethylamine (11 mmol, 1.1 equiv) in dichloromethane (50 mL, 0.2 M) at 0 °C. The reaction mixture was stirred at 0 °C for 20 min to 1 h, diluted with dichloromethane (50 mL), washed with saturated  $\text{NH}_4\text{Cl}$  (3 x 30 mL), dried ( $\text{Na}_2\text{SO}_4$ ), and concentrated *in vacuo* to afford crude product. The crude product was purified by flash column chromatography, crystallization, or trituration to yield pure *N*-aryl-2-bromoacetamide (26% to 96%).

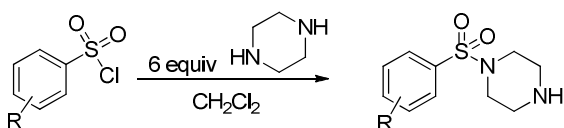

**General Procedure B:** Arylsulfonyl chloride (10 mmol, 1 equiv) was added in one portion to a solution of piperazine (60 mmol, 6 equiv) in  $\text{CH}_2\text{Cl}_2$  (100 mL, 0.1 M) at 0 °C. The reaction mixture was stirred at 0 °C for 30 min, diluted with  $\text{CH}_2\text{Cl}_2$  (200 mL), quenched by the addition of saturated  $\text{NaHCO}_3(\text{aq})$  (50 mL), washed with brine (50 mL), dried ( $\text{Na}_2\text{SO}_4$ ), and concentrated *in vacuo* to provide crude product. The crude product was used directly, or purified by crystallization or trituration to yield pure arylsulfonylpiperazine (75% to quant).

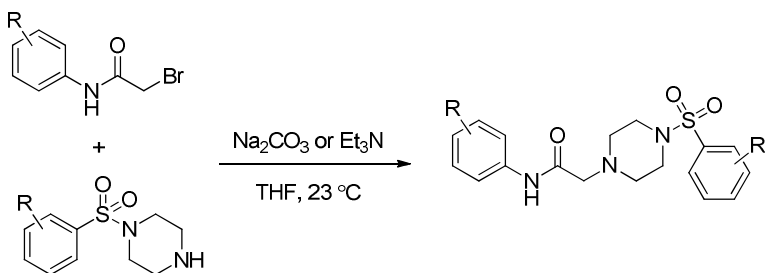

**General Procedure C:** Sodium carbonate (0.4 mmol, 2 equiv) or triethylamine (0.4 mmol, 2 equiv) was added to a solution of *N*-aryl-2-bromoacetamide (0.2 mmol, 1 equiv) and arylsulfonyl piperazine (0.2 mmol, 1 equiv) in THF (1 mL, 0.2 M) at 23 °C. The reaction mixture was allowed to stir for 16 h, diluted with  $\text{CH}_2\text{Cl}_2$  (5 mL), filtered, and concentrated *in vacuo* to afford crude product. The crude product was purified by flash column chromatography to yield pure product (48% to 86%) which was converted to the HCl or MsOH salt for biological testing.

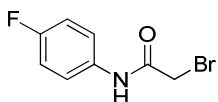

**2-bromo-*N*-(4-fluorophenyl)acetamide (S1):** Following general procedure A, the crude product was used directly as a brown solid (96%). Analytically pure material could be crystallized (EtOH) as a white crystal:  $^1\text{H}$  NMR ( $\text{CDCl}_3$ , 500

MHz)  $\delta$  = 8.14 (br s, 1H), 7.45-7.53 (m, 2H), 6.98-7.10 (m, 2H), 4.02 (s, 2H);  $^{13}\text{C}$  NMR ( $\text{CDCl}_3$ , 126MHz)  $\delta$  = 163.5, 161.0, 159.0, 133.0, 133.0, 122.2, 122.1, 116.0, 115.9, 29.4; IR (neat)  $\lambda_{\text{max}}$  3269, 2831, 1652, 1621, 1506, 1210, 836; HRMS (ESI)  $m/z$  calcd for  $\text{C}_8\text{H}_7\text{BrFNNaO}$ : 253.9587; found: 253.9559.

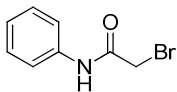

**2-bromo-N-phenylacetamide (S2):** Following general procedure A, the crude product, as an orange solid, was purified by passing through a plug of silica, followed by trituration ( $\text{Et}_2\text{O}$ ) to provide pure **S2** as a white solid (58%):  $^1\text{H}$  NMR ( $\text{CDCl}_3$ , 400 MHz)  $\delta$  = 8.20 (br s, NH), 7.53 (d,  $J$  = 7.8 Hz, 2H), 7.36 (t,  $J$  = 8.0 Hz, 2H), 7.17 (br apparent t, 1H), 4.02 (s, 2H);  $^{13}\text{C}$  NMR ( $\text{CDCl}_3$ , 101MHz)  $\delta$  = 163.5, 137.0, 129.2, 125.3, 120.2, 29.6; IR (neat)  $\lambda_{\text{max}}$  2919, 1652, 1556, 1337, 1112, 759; HRMS (ESI)  $m/z$  calcd for  $\text{C}_8\text{H}_8\text{BrNNaO}$ : 235.9681; found: 235.9682.

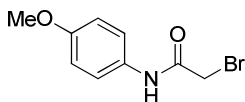

**2-bromo-N-(4-methoxyphenyl)acetamide (S3):** Following general procedure A, the crude product, as a brown solid, was purified by trituration ( $\text{CH}_2\text{Cl}_2$ ) to provide pure **S3** as a white solid (50%):  $^1\text{H}$  NMR ( $\text{CDCl}_3$ , 500 MHz)  $\delta$  = 8.11 (br s, NH), 7.37-7.45 (m, 2H), 6.81-6.91 (m, 2H), 4.00 (s, 2H), 3.79 (s, 3H);  $^{13}\text{C}$  NMR ( $\text{CDCl}_3$ , 126 MHz)  $\delta$  = 163.5, 157.2, 130.1, 122.2, 114.4, 55.6, 29.6; IR (neat)  $\lambda_{\text{max}}$  3287, 2955, 1659, 1513, 1253, 1031, 830, 777, 710, 520; HRMS (ESI)  $m/z$  calcd for  $\text{C}_9\text{H}_{10}\text{BrNNaO}_2$ : 265.9787; found: 265.9781.

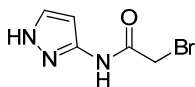

**2-bromo-N-(1H-pyrazol-3-yl)acetamide (S4):** Bromoacetyl bromide (0.150 mL, 1.72 mmol) was added to a solution of 3-aminopyrazole (142.5 mg, 1.72 mmol) and  $\text{Na}_2\text{CO}_3$  (365 mg, 3.44 mmol) in THF (8.6 mL) at 0 °C. The reaction mixture was allowed to stir at 0 °C for 30 min, at which time the reaction mixture was filtered. Saturation of the organic layer with  $\text{Et}_2\text{O}$  (10 mL) led to precipitant that was collected by vacuum filtration to provide pure **S4** as a white solid (294 mg, 84%).  $^1\text{H}$  NMR ( $\text{DMSO-d}_6$ , 500 MHz)  $\delta$  = 12.19 (br s, 1H), 11.10 (s, 1H), 7.74 (d,  $J$  = 2.2 Hz, 1H), 6.44 (d,  $J$  = 2.2 Hz, 1H), 4.05 (s, 2H);  $^{13}\text{C}$  NMR ( $\text{DMSO-d}_6$ , 126 MHz)  $\delta$  = 164.3, 145.3, 130.3, 96.0, 29.6; IR (neat)  $\lambda_{\text{max}}$  3368, 2950, 1740, 1644, 1435, 1238, 1096, 1065, 998, 779; HRMS (ESI)  $m/z$  calcd for  $\text{C}_5\text{H}_7\text{BrN}_3\text{O}$ : 203.9767; found: 203.9758.

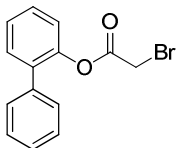

**[1,1'-biphenyl]-2-yl 2-bromoacetate (S5):** Following general procedure A, crude product **S5**, as a clear oil, was used without further purification:  $^1\text{H}$  NMR ( $\text{CDCl}_3$ ,

400 MHz)  $\delta$  = 7.31-7.45 (m, 8H), 7.11-7.21 (m, 1H), 3.83 (s, 2H);  $^{13}\text{C}$  NMR ( $\text{CDCl}_3$ , 126 MHz)  $\delta$  = 165.5, 147.4, 136.9, 134.7, 131.0, 128.9, 128.6, 128.4, 127.6, 126.8, 122.3, 25.2; IR (neat)  $\lambda_{\text{max}}$  1760, 1479, 1251, 1188, 1124, 745, 701; HRMS (ESI)  $m/z$  calcd for  $\text{C}_{14}\text{H}_{11}\text{BrNaO}_2$ : 312.9835; found: 312.9821.

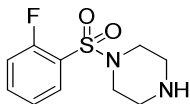

**1-((2-fluorophenyl)sulfonyl)piperazine (S6):** Following general procedure B, crude product was purified by trituration ( $\text{Et}_2\text{O}$ /hexanes) to provide **S6** as a white solid (75%):  $^1\text{H}$  NMR ( $\text{CDCl}_3$ , 400 MHz)  $\delta$  = 7.77-7.88 (m, 1H), 7.49-7.64 (m, 1H), 7.26-7.33 (m, 1H), 7.21 (ddd,  $J$  = 9.9, 8.5, 1.0 Hz, 1H), 3.09-3.21 (m, 4H), 2.87-2.98 (m, 4H), 1.57 (br s, 1H);  $^{13}\text{C}$  NMR ( $\text{CDCl}_3$ , 101 MHz)  $\delta$  = 160.2, 157.7, 135.1, 135.1, 131.3, 124.8, 124.6, 124.5, 124.4, 117.4, 117.2, 46.6, 45.4; IR (neat)  $\lambda_{\text{max}}$  3338, 3099, 2855, 1599, 1582, 1173, 950, 583, 507; HRMS (ESI)  $m/z$  calcd for  $\text{C}_{10}\text{H}_{14}\text{FN}_2\text{O}_2\text{S}$ : 245.0755; found: 245.0744.

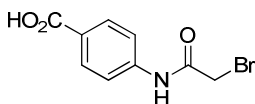

**4-(2-bromoacetamido)benzoic acid (S7):** Bromoacetyl bromide (0.903 mL, 10.4 mmol) was added to a solution of *p*-aminobenzoic acid (1.4 g, 10.4 mmol) and triethylamine (2.5 mL, 20.8 mmol) in  $\text{CH}_2\text{Cl}_2$  (6 mL). The reaction mixture was stirred for 2 h, then filtered to provide crude product as a white solid. The filtrate was washed with saturated  $\text{NH}_4\text{Cl}_{(\text{aq})}$  upon where crude product precipitated. The combined crude product was triturated with  $\text{CH}_2\text{Cl}_2$  to provide **S7** (820 mg, 31%) as a white solid with a minor inseparable impurity:  $^1\text{H}$  NMR ( $\text{DMSO-d}_6$ , 500 MHz)  $\delta$  = 12.66 (br s, OH), 10.64 (br s, NH), 7.91 (d,  $J$  = 7.9 Hz, 2H), 7.66-7.72 (m, 2H), 4.05 (br s, 2H);  $^{13}\text{C}$  NMR ( $\text{DMSO-d}_6$ , 126 MHz)  $\delta$  = 166.9, 165.4, 142.6, 130.5, 125.9, 118.7, 30.3; IR (neat)  $\lambda_{\text{max}}$  3794, 1915, 1682, 1180, 857, 770, 548; HRMS (ESI)  $m/z$  calcd for  $\text{C}_9\text{H}_8\text{BrNNaO}_3$ : 279.9580; found: 279.9567.

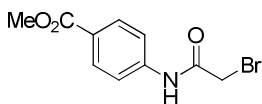

**methyl 4-(2-bromoacetamido)benzoate (S8):** Bromoacetyl bromide (0.335 mL, 3.86 mmol) was added to a solution of methyl-4-aminobenzoate (584 mg, 3.86 mmol) and triethylamine (0.95 mL, 7.7 mmol) in  $\text{CH}_2\text{Cl}_2$  (1.9 mL) at 0 °C. The reaction was stirred 2 h, diluted with  $\text{CH}_2\text{Cl}_2$  (10 mL), washed with saturated  $\text{NH}_4\text{Cl}_{(\text{aq})}$ , dried ( $\text{Na}_2\text{SO}_4$ ), and concentrated *in vacuo* to afford the crude product as a black oil. The crude product was purified by flash column chromatography (silica, 1:1  $\text{Et}_2\text{O}$ /hexanes) to provide **S8** as an off white solid (80%):  $^1\text{H}$  NMR ( $\text{CDCl}_3$ , 400 MHz)  $\delta$  = 8.26 (br s, 1H), 7.97-8.12 (m,  $J$  = 8.8 Hz, 2H), 7.58-7.67 (m,  $J$  = 8.8 Hz, 2H), 4.04 (s, 2H), 3.91 (s, 3H);  $^{13}\text{C}$  NMR ( $\text{CDCl}_3$ , 101 MHz)  $\delta$  = 166.6, 164.3, 141.3, 130.9, 126.4, 119.3, 52.2, 29.4; IR (neat)  $\lambda_{\text{max}}$  3816, 1921, 1716, 1674, 1603, 1278, 1111, 963, 853, 769; HRMS (ESI)  $m/z$  calcd for  $\text{C}_{10}\text{H}_{10}\text{BrNNaO}_3$ : 293.9736; found: 293.9728.

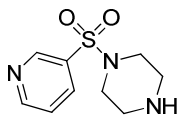

**1-(pyridin-3-ylsulfonyl)piperazine (S9):** Following general procedure B, crude **S9** (80%) was isolated, and used without further purification:  $^1\text{H}$  NMR ( $\text{CDCl}_3$ , 500 MHz)  $\delta$  = 8.92 (d,  $J$  = 1.9 Hz, 1H), 8.77 (dd,  $J$  = 4.9, 1.4 Hz, 1H), 7.99 (dt,  $J$  = 8.0, 2.0 Hz, 1H), 7.45 (dd,  $J$  = 8.0, 4.3 Hz, 1H), 2.93-3.04 (m, 4H), 2.82-2.93 (m, 4H), 2.47 (t,  $J$  = 4.6 Hz, 1H);  $^{13}\text{C}$  NMR ( $\text{CDCl}_3$ , 126 MHz)  $\delta$  = 153.4, 148.5, 135.3, 132.5, 123.7, 46.7, 45.2; IR (neat)  $\lambda_{\text{max}}$  3436, 2853, 1574, 1174, 949, 756, 582; HRMS (ESI)  $m/z$  calcd for  $\text{C}_9\text{H}_{14}\text{N}_3\text{O}_2\text{S}$ : 228.0801; found: 228.0790.

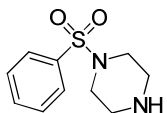

**1-(phenylsulfonyl)piperazine (S10):** Following general procedure B, pure **S10** (quant) was isolated, and used without further purification:  $^1\text{H}$  NMR ( $\text{CDCl}_3$ , 400 MHz)  $\delta$  = 7.71-7.80 (m, 2H), 7.47-7.66 (m, 3H), 2.97-2.99 (m, 4H), 2.84-2.95 (m, 4H), 1.51 (br s, NH);  $^{13}\text{C}$  NMR ( $\text{CDCl}_3$ , 126 MHz)  $\delta$  = 135.5, 132.8, 129.0, 127.7, 46.8, 45.2; IR (neat)  $\lambda_{\text{max}}$  2860, 1917, 1448, 1170, 947, 693, 577; HRMS (ESI)  $m/z$  calcd for  $\text{C}_{10}\text{H}_{15}\text{N}_2\text{O}_2\text{S}$ : 227.0849; found 227.0841.

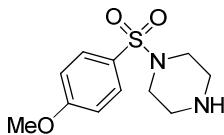

**1-((4-methoxyphenyl)sulfonyl)piperazine (S11):** Following general procedure B, pure **S11** (99%) was isolated, and used without further purification:  $^1\text{H}$  NMR ( $\text{CDCl}_3$ , 400 MHz)  $\delta$  = 7.56-7.62 (m, 2H), 6.87-6.96 (m, 2H), 3.79 (s, 3H), 2.77-2.91 (m, 8H), 1.81 (s, NH);  $^{13}\text{C}$  NMR ( $\text{CDCl}_3$ , 101 MHz)  $\delta$  = 163.0, 129.8, 114.1, 55.6, 46.7, 45.1; IR (neat)  $\lambda_{\text{max}}$  2845, 1911, 1597, 1162, 732, 559; HRMS (ESI)  $m/z$  calcd for  $\text{C}_{11}\text{H}_{17}\text{N}_2\text{O}_3\text{S}$ : 257.0954; found: 257.0961.

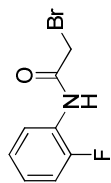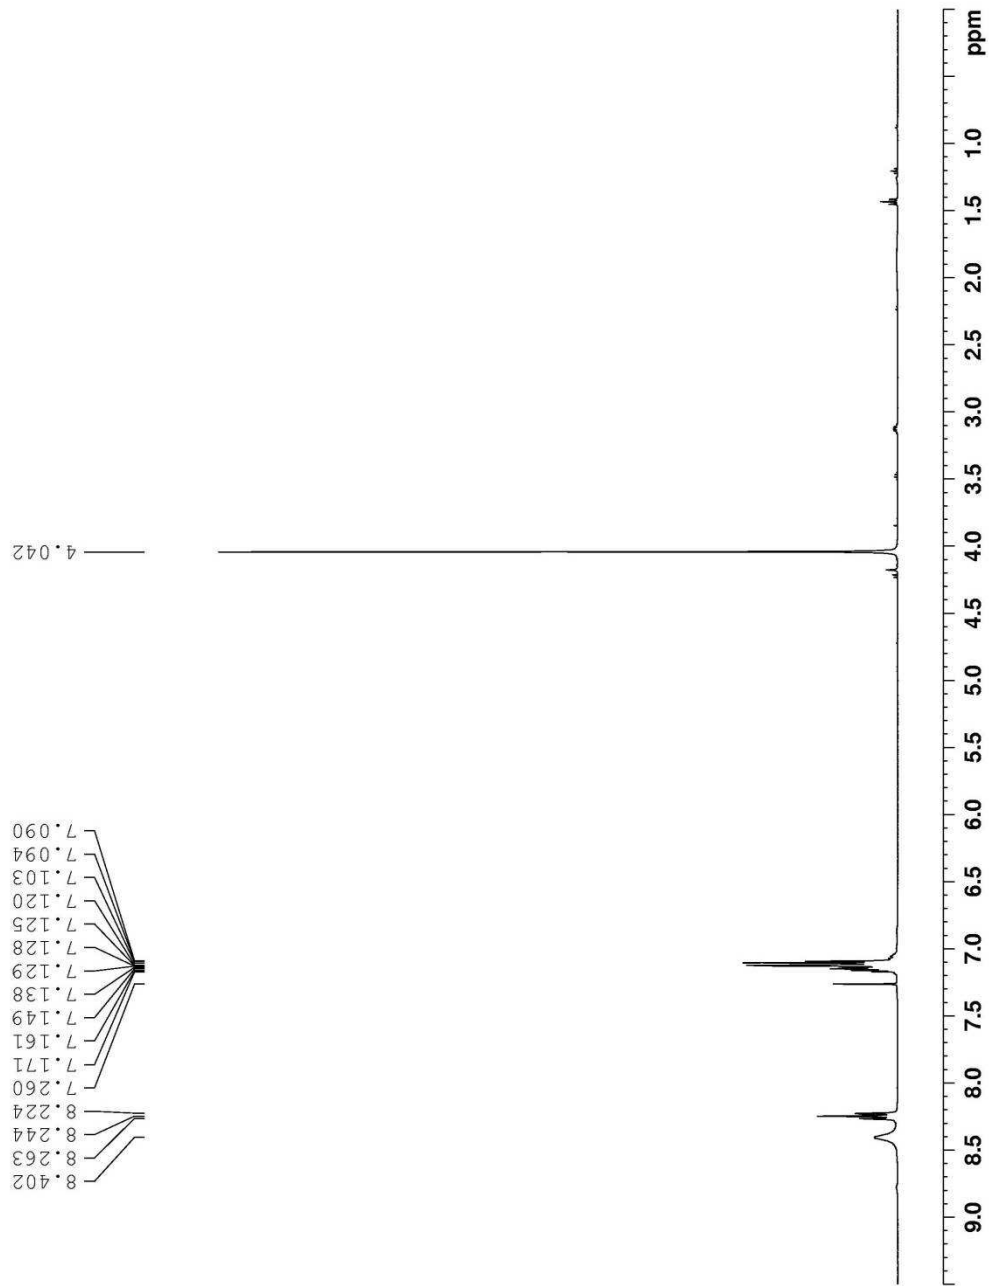

<sup>1</sup>H NMR (CDCl<sub>3</sub>, 400 MHz) of 2.

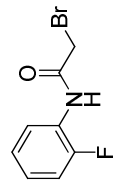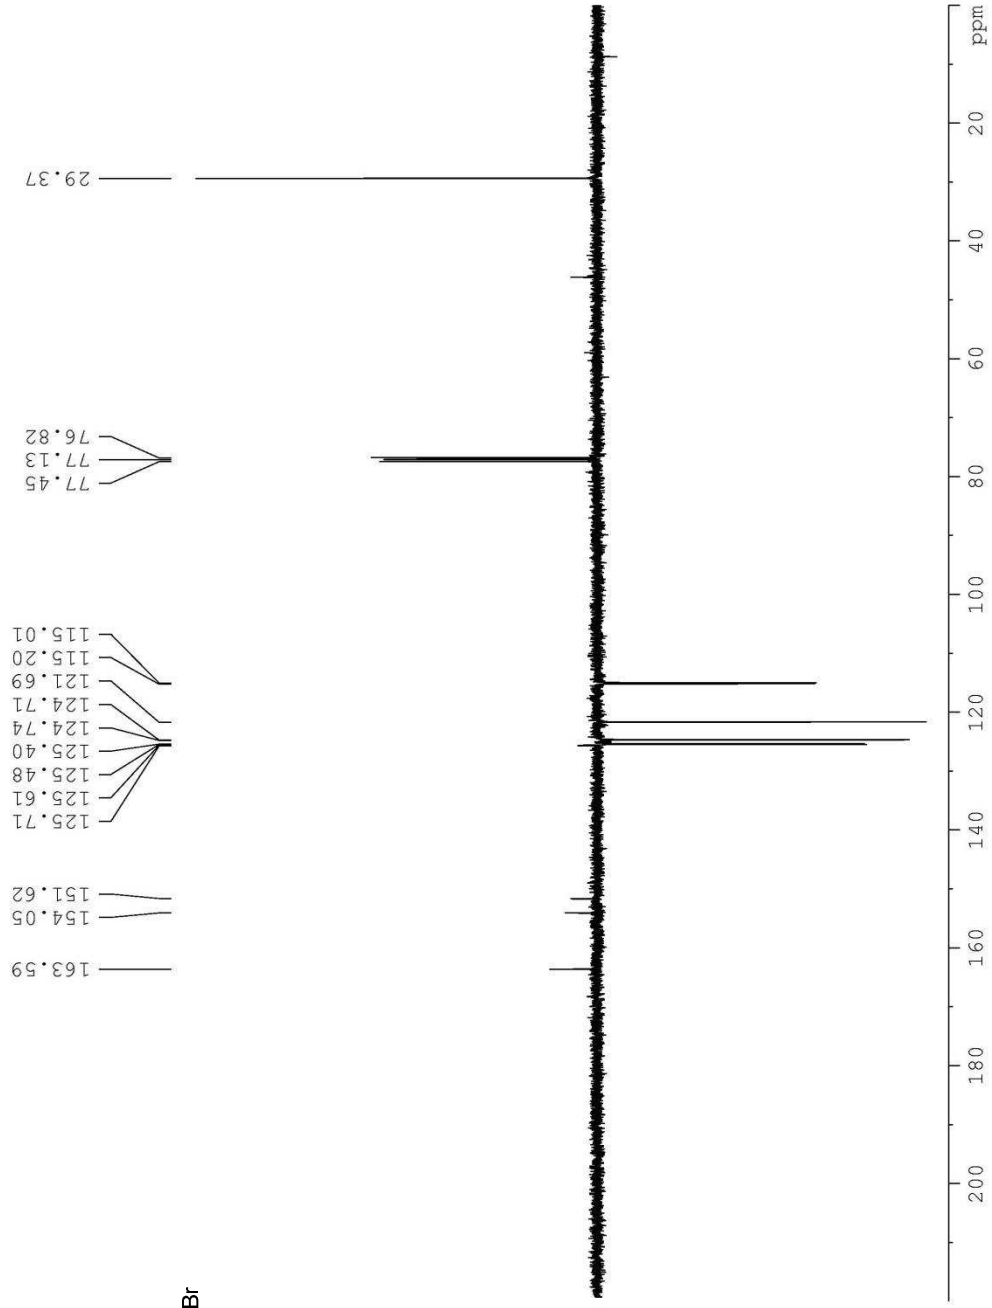

<sup>13</sup>C NMR (CDCl<sub>3</sub>, 101 MHz) of **2**.



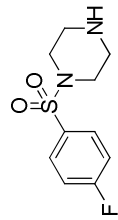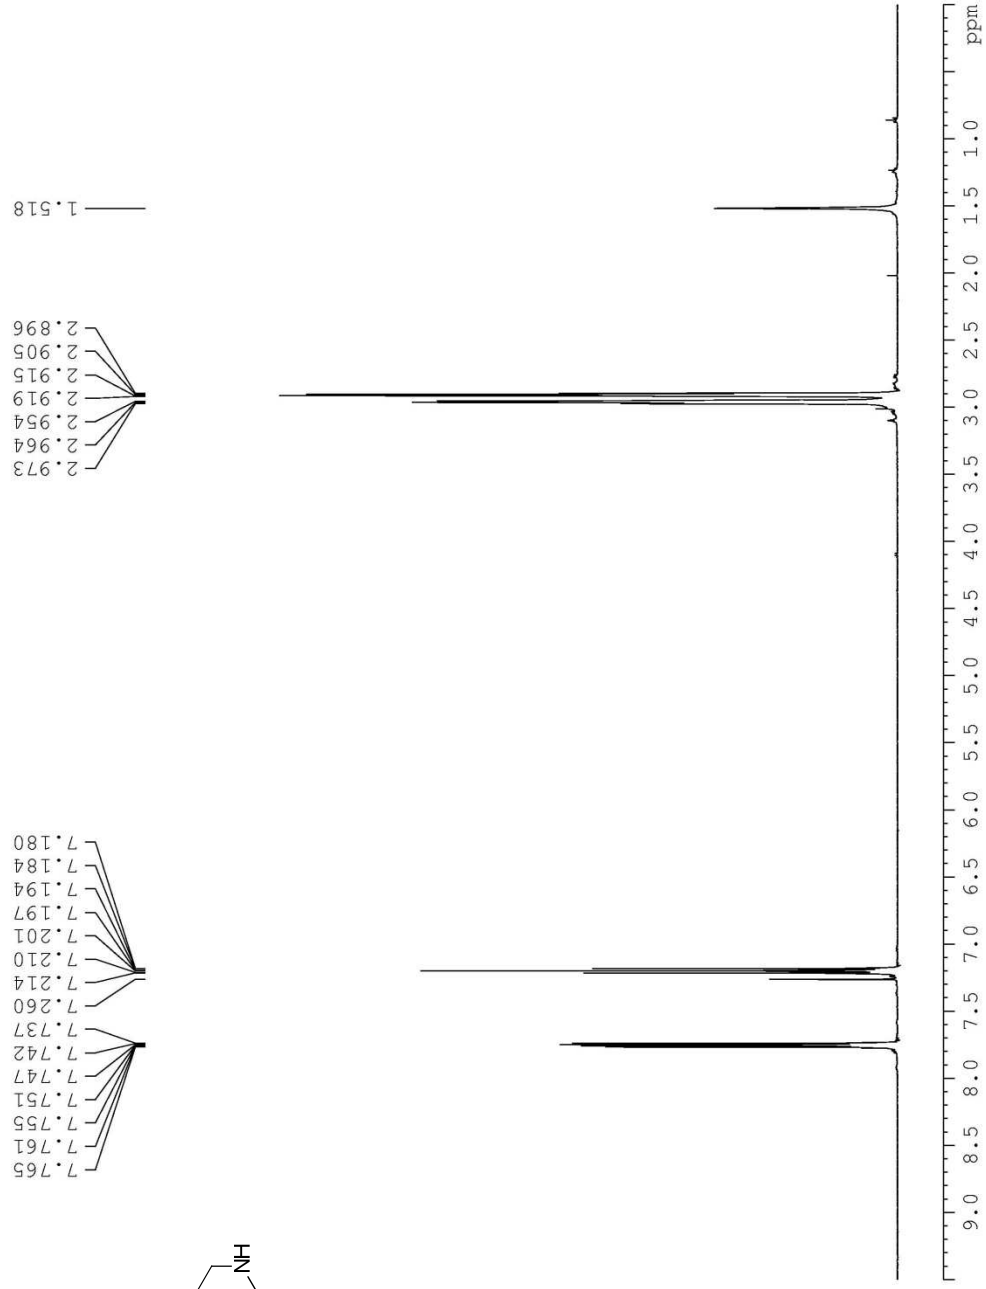

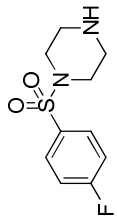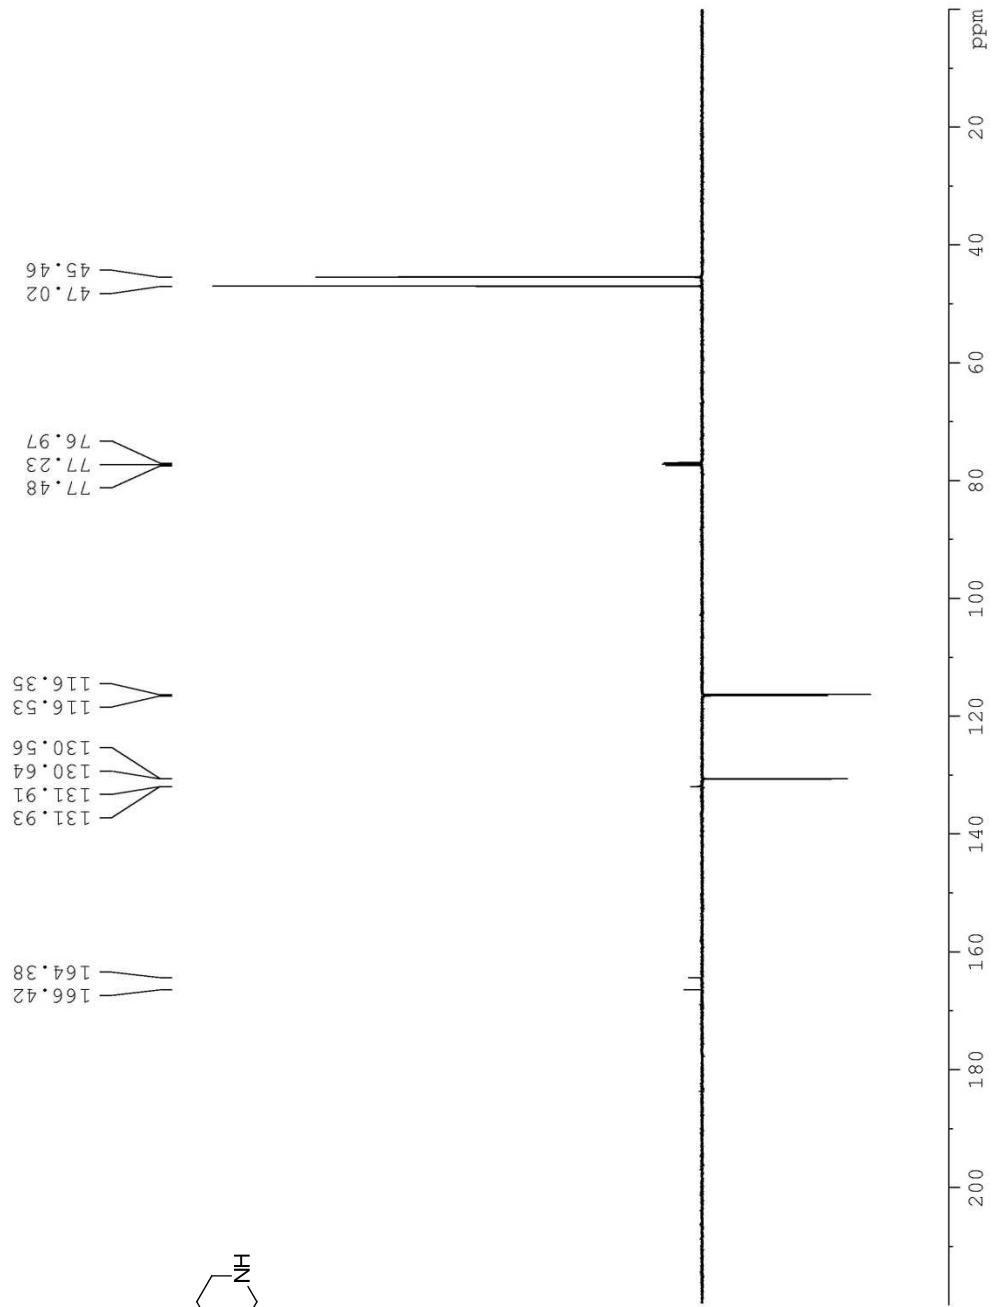

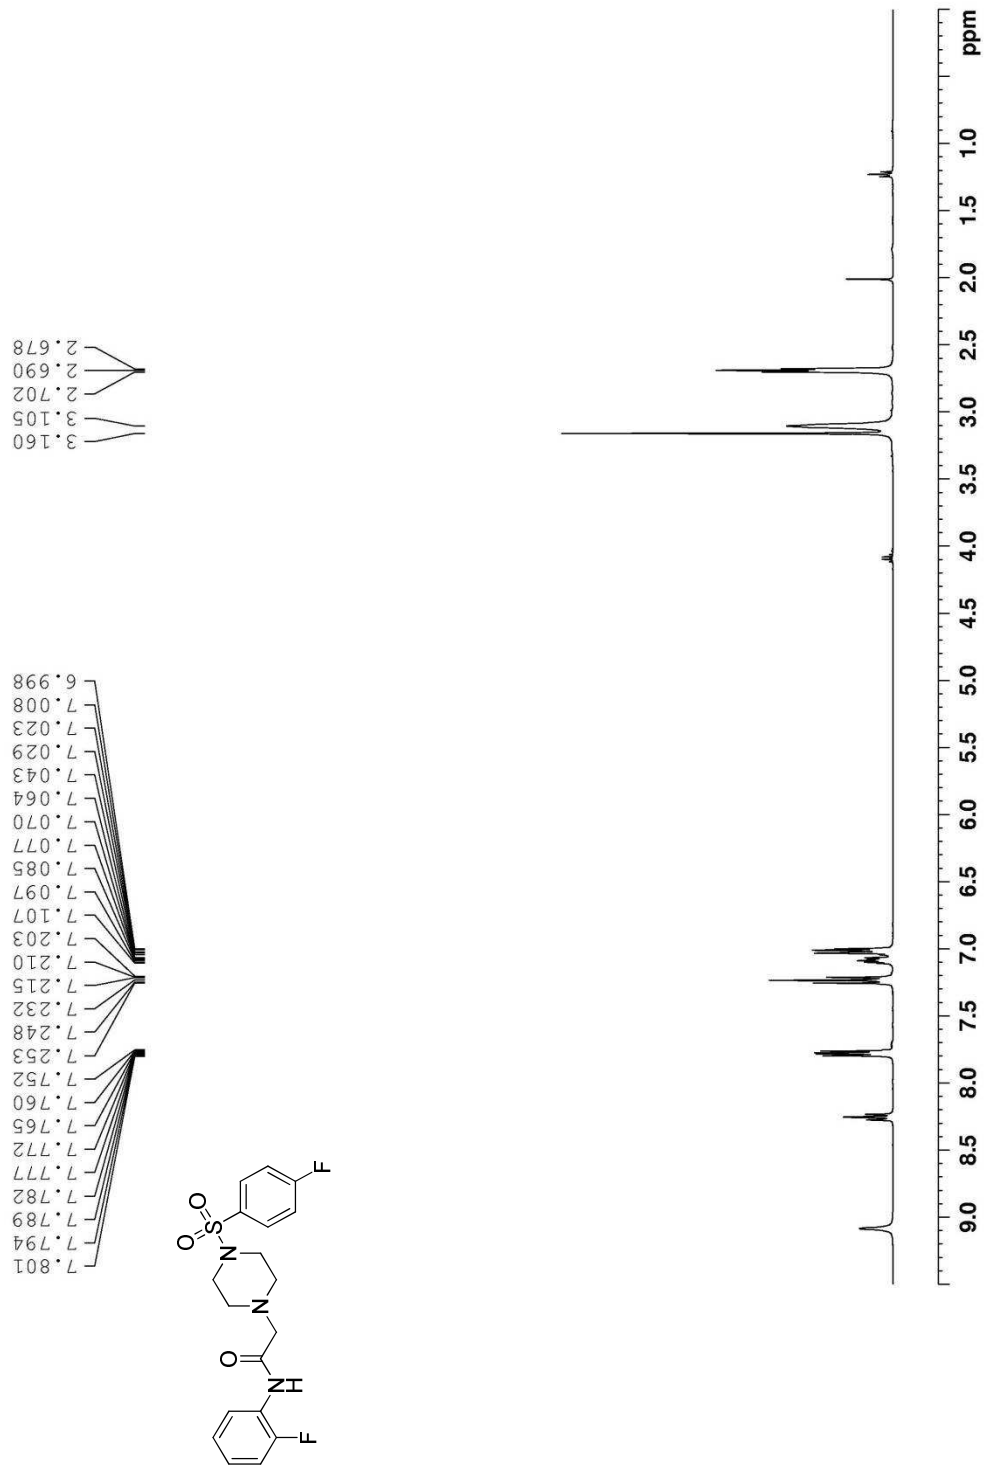

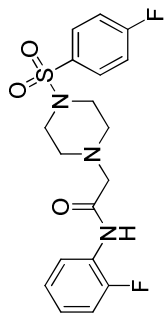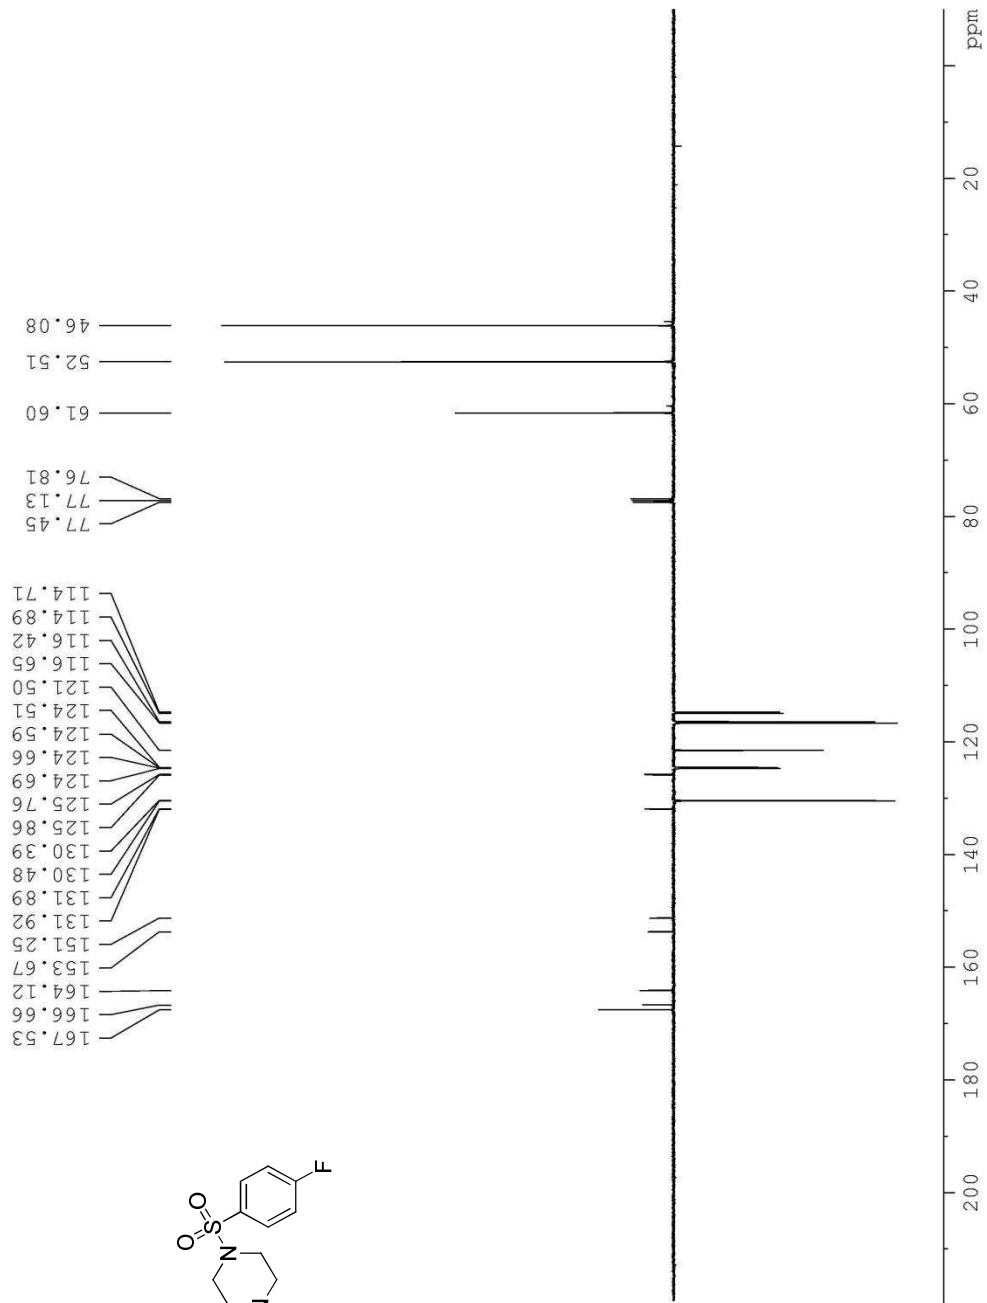

S12

<sup>13</sup>C NMR (CDCl<sub>3</sub>, 101 MHz) of **1**.

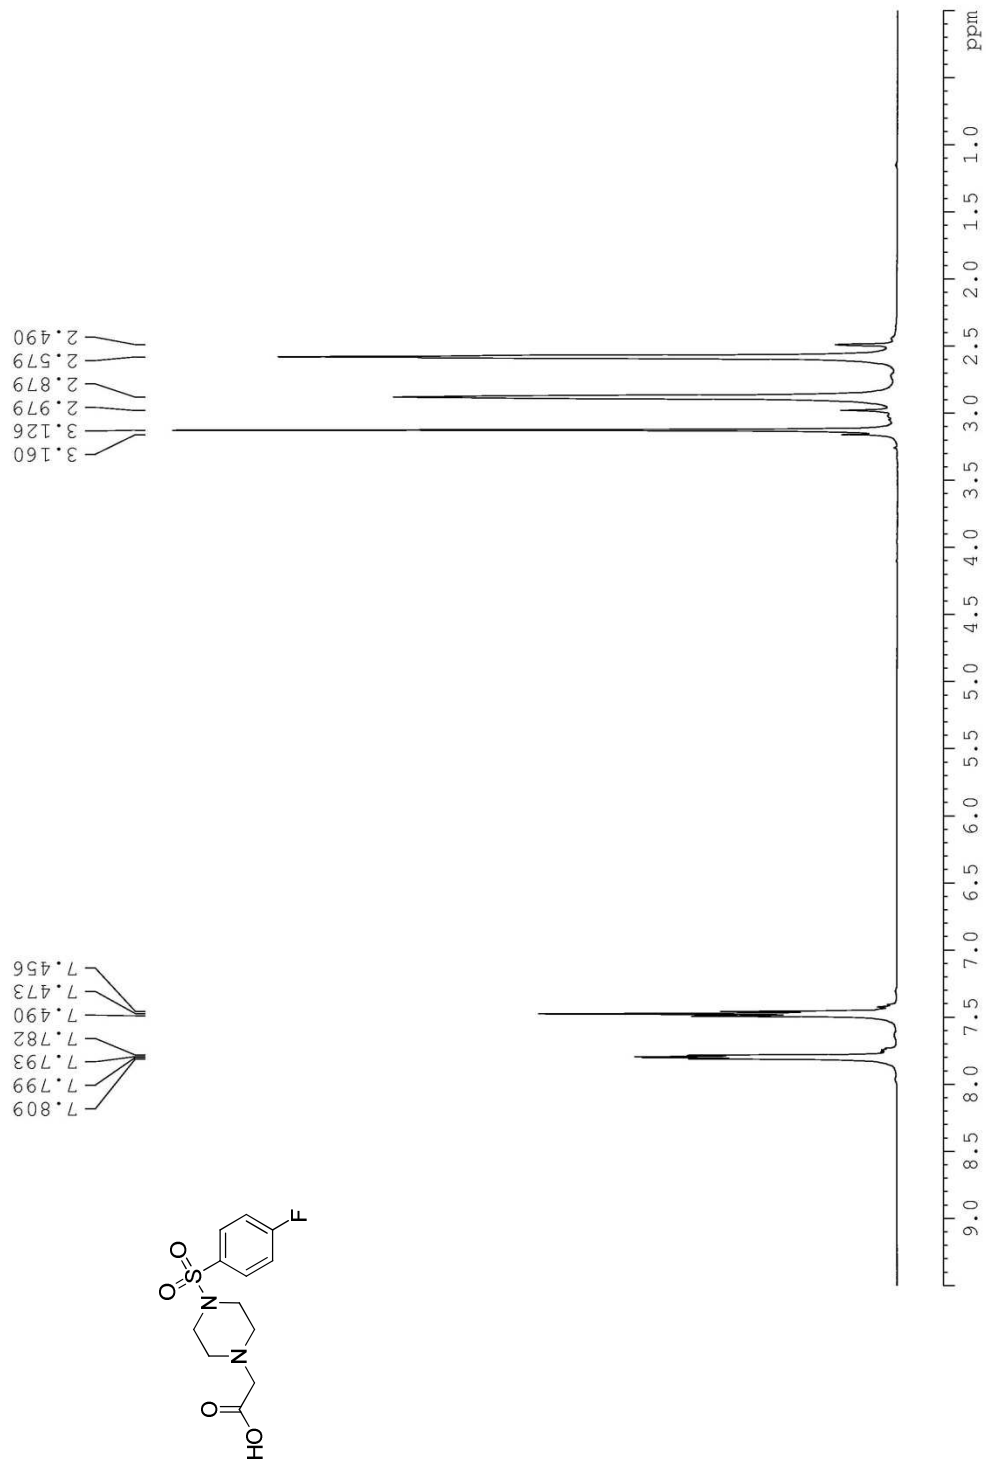

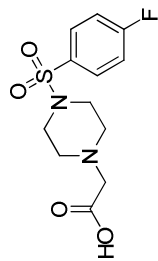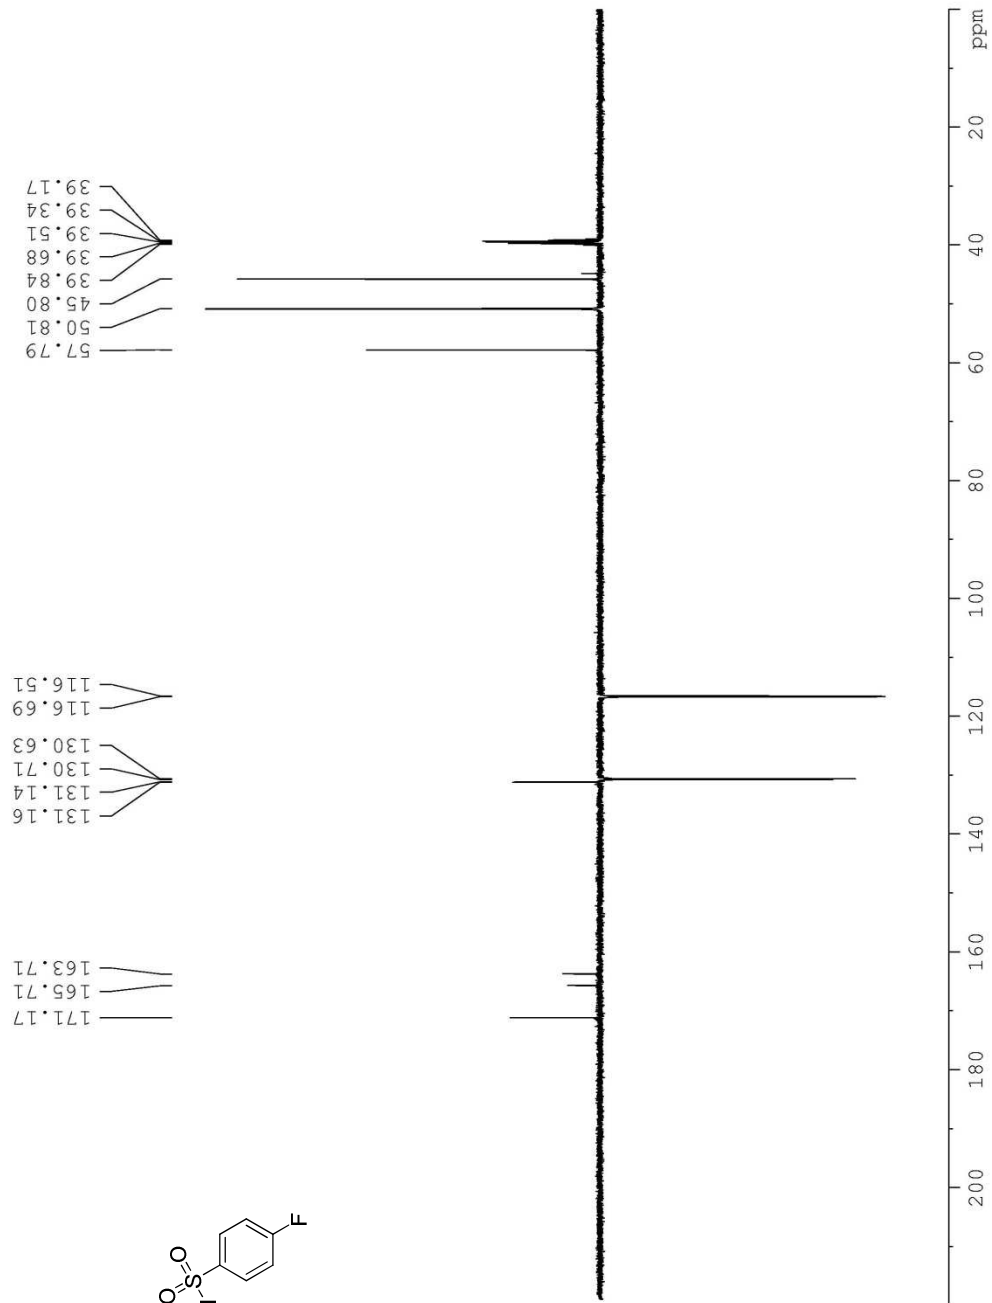

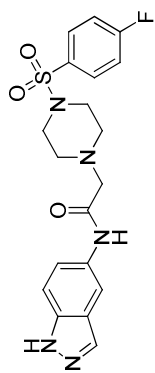

S15

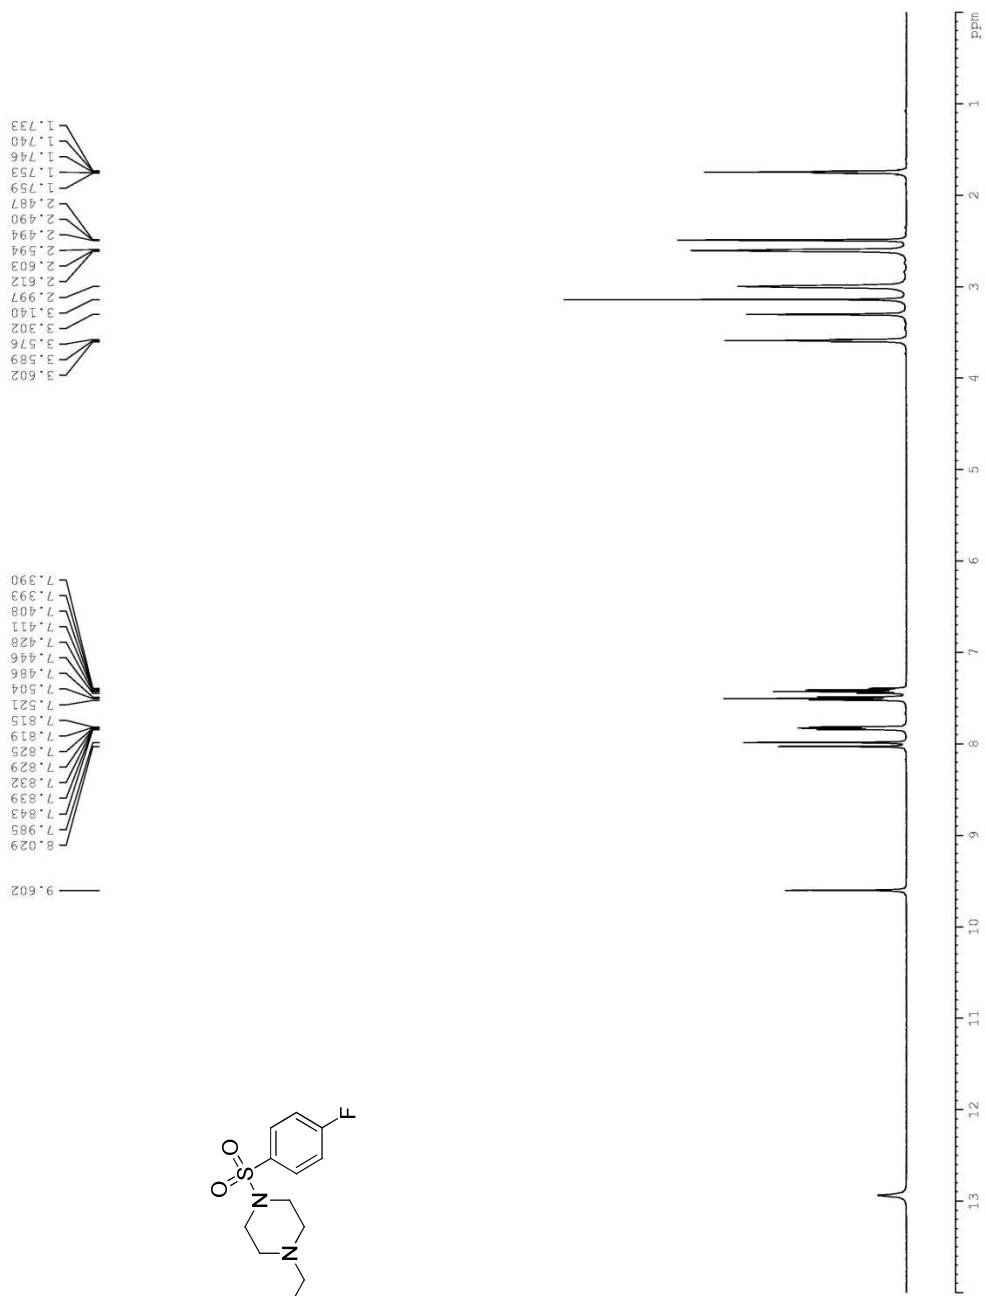

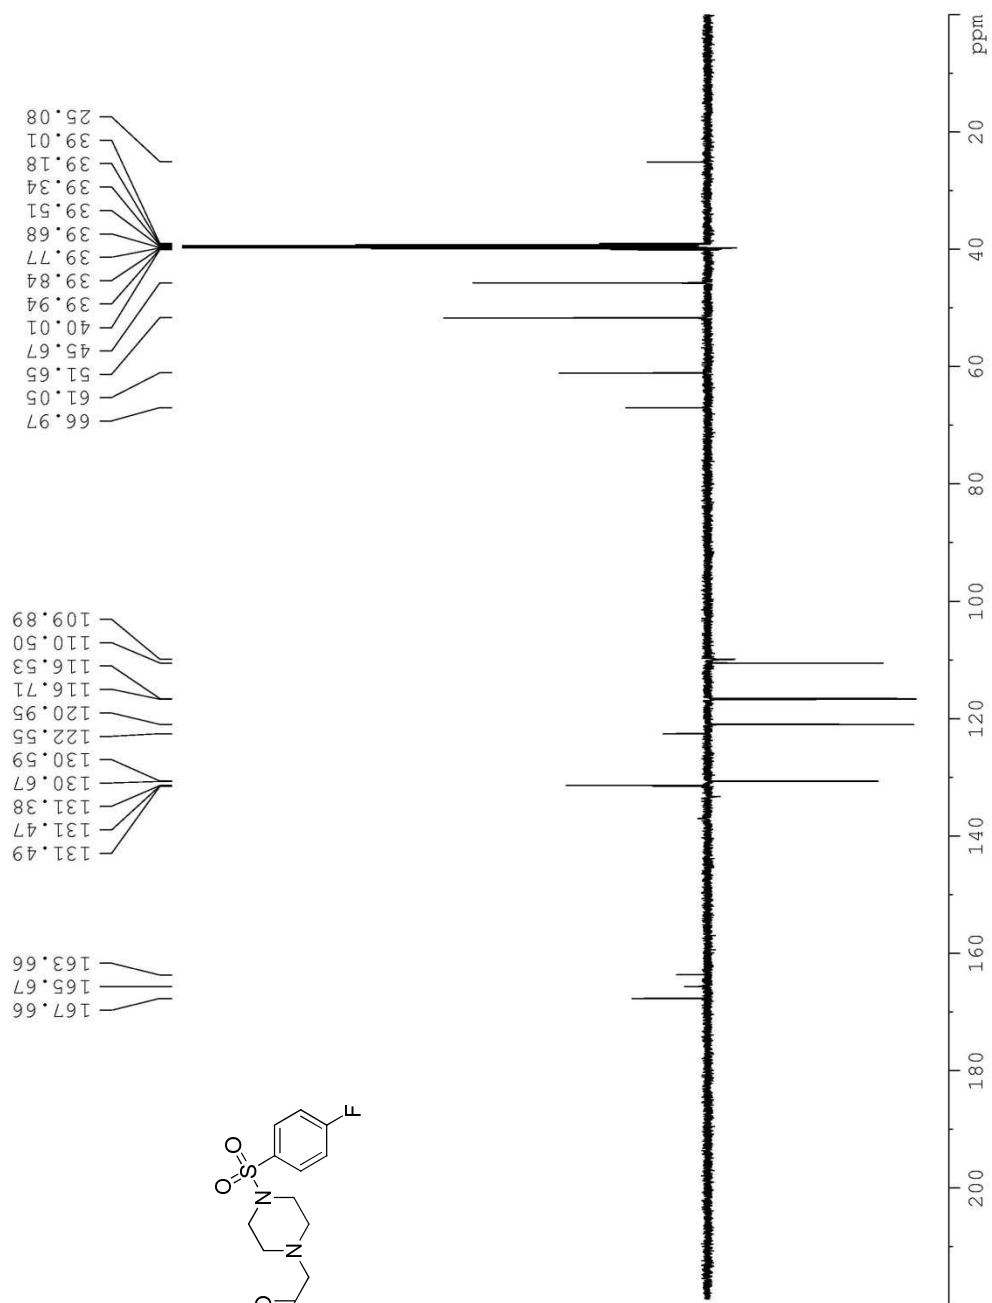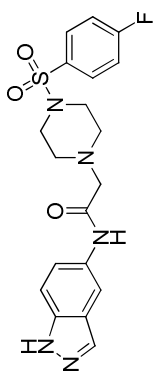

$^{13}\text{C}$  NMR (DMSO- $d_6$ , 126 MHz) of **11**.



LIS

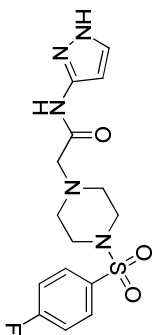

<sup>1</sup>H NMR (CDCl<sub>3</sub>, 500 MHz) of **12**.

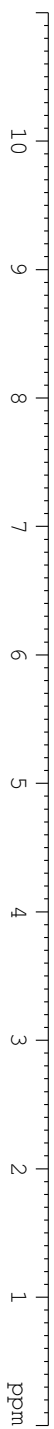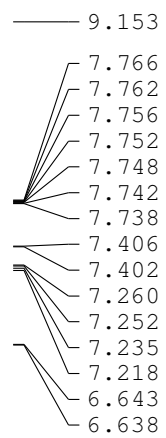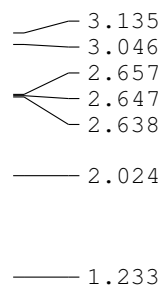

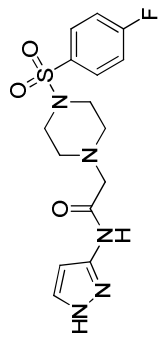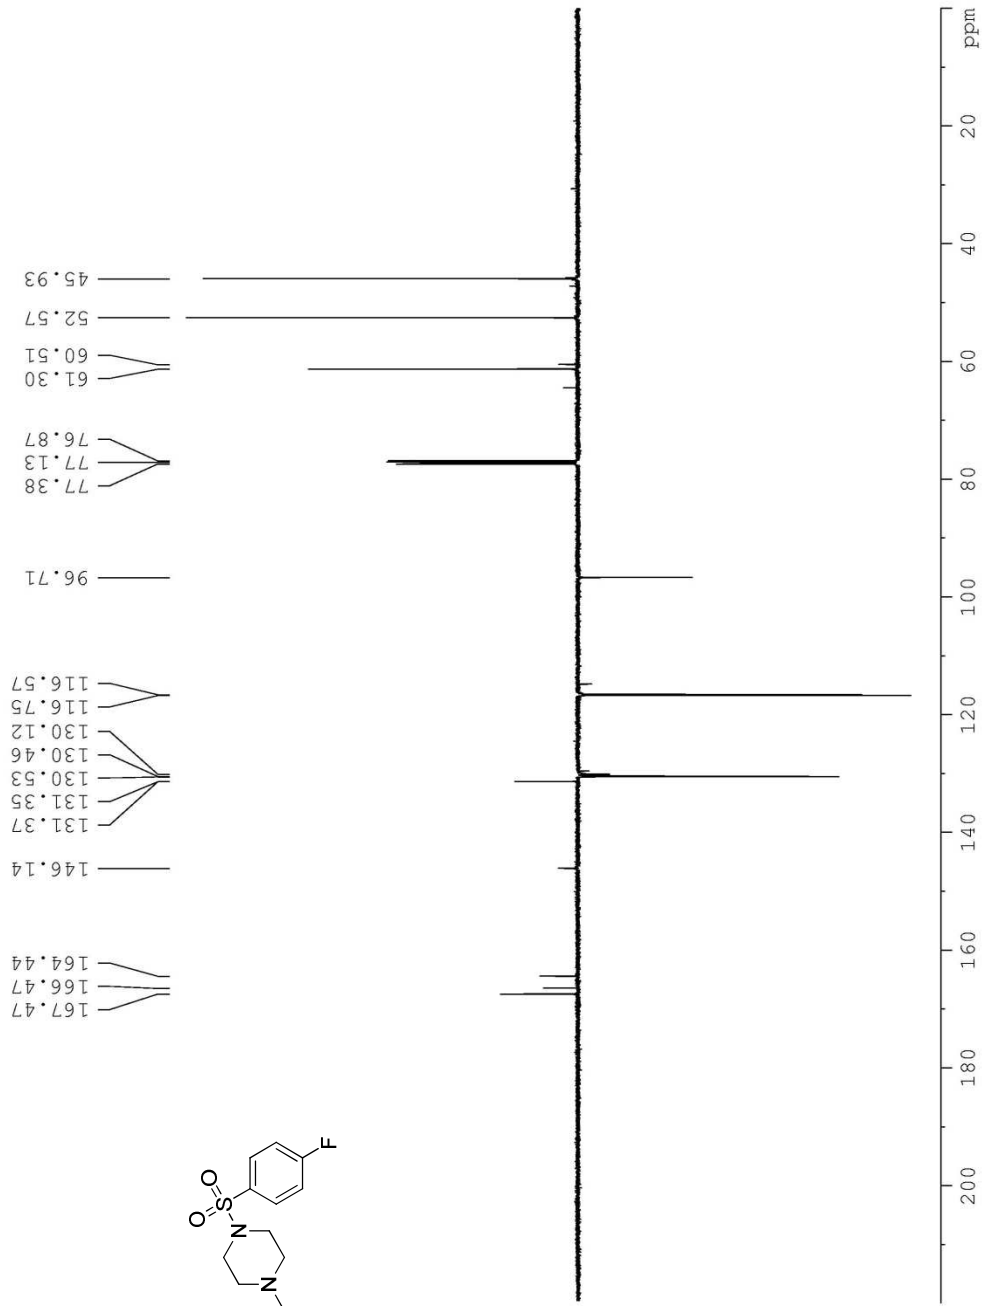

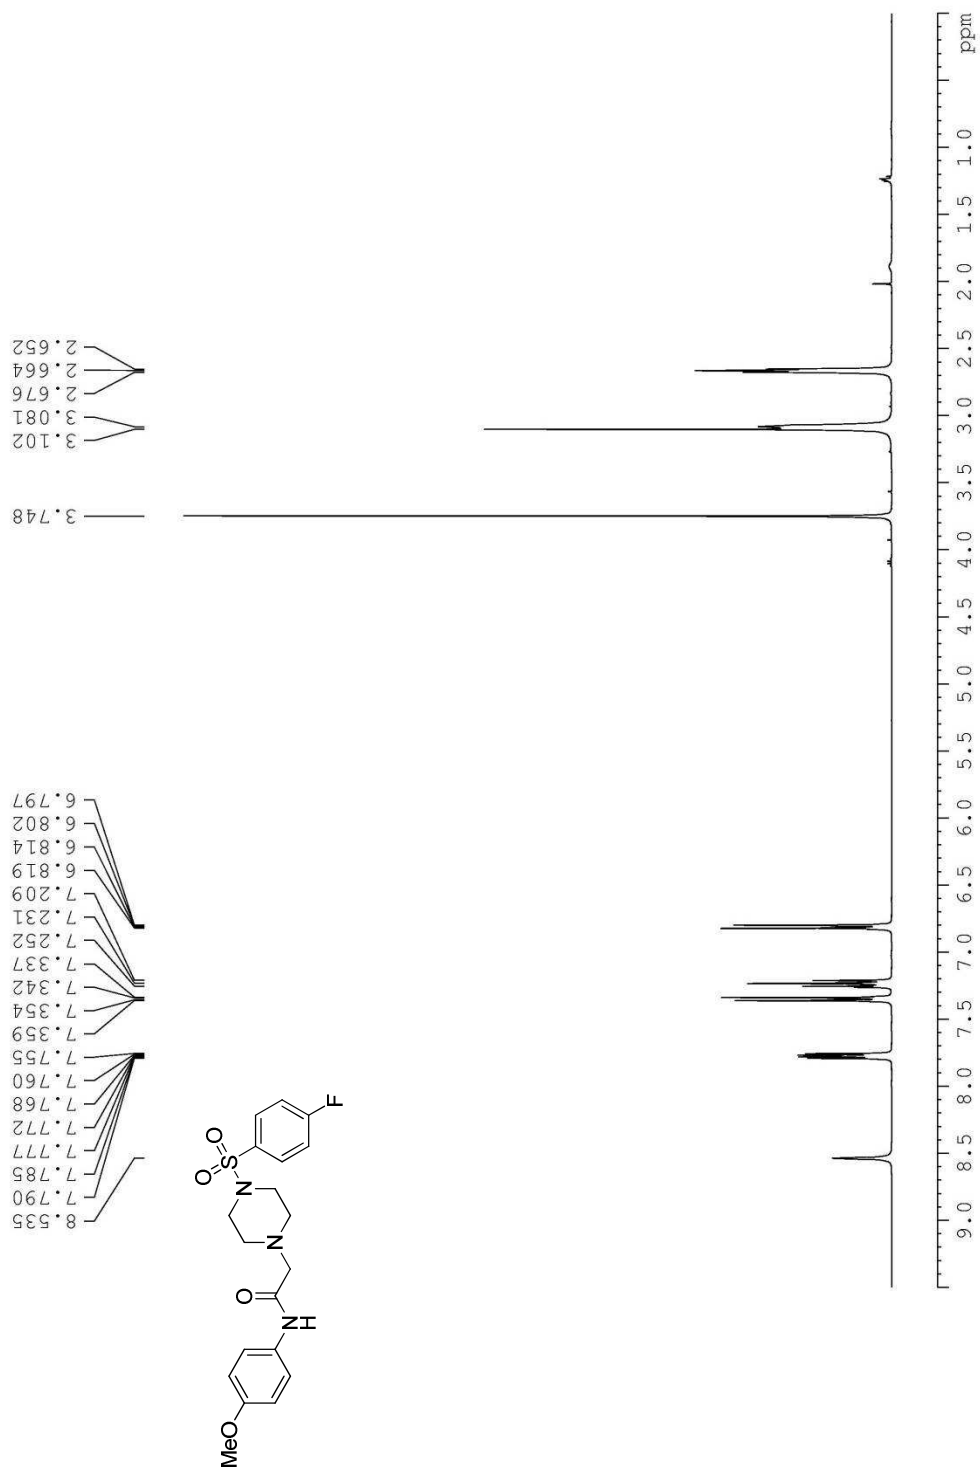

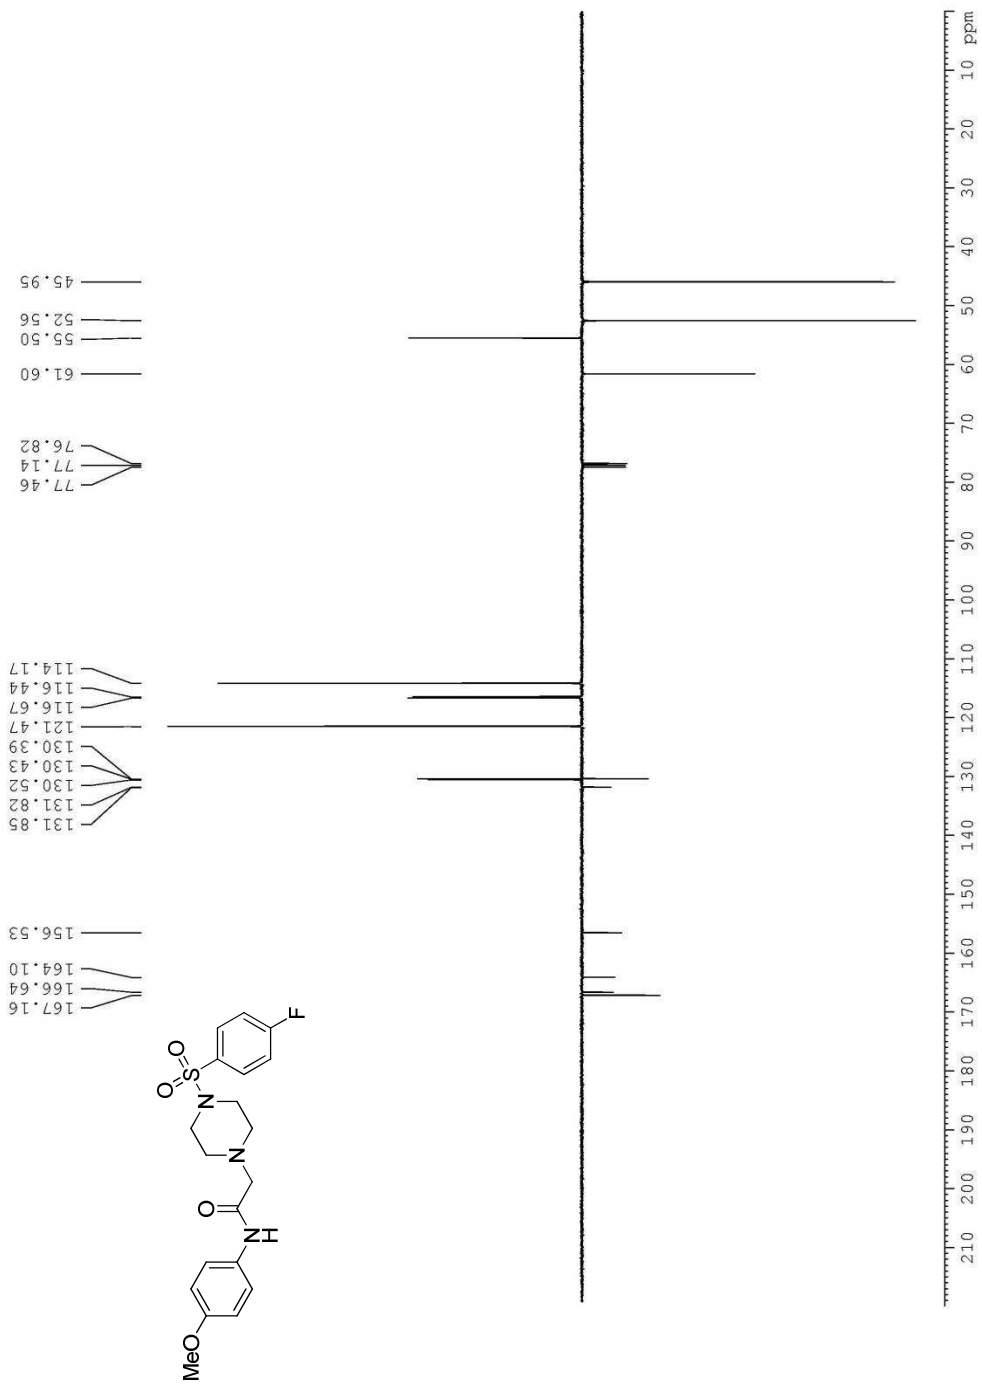

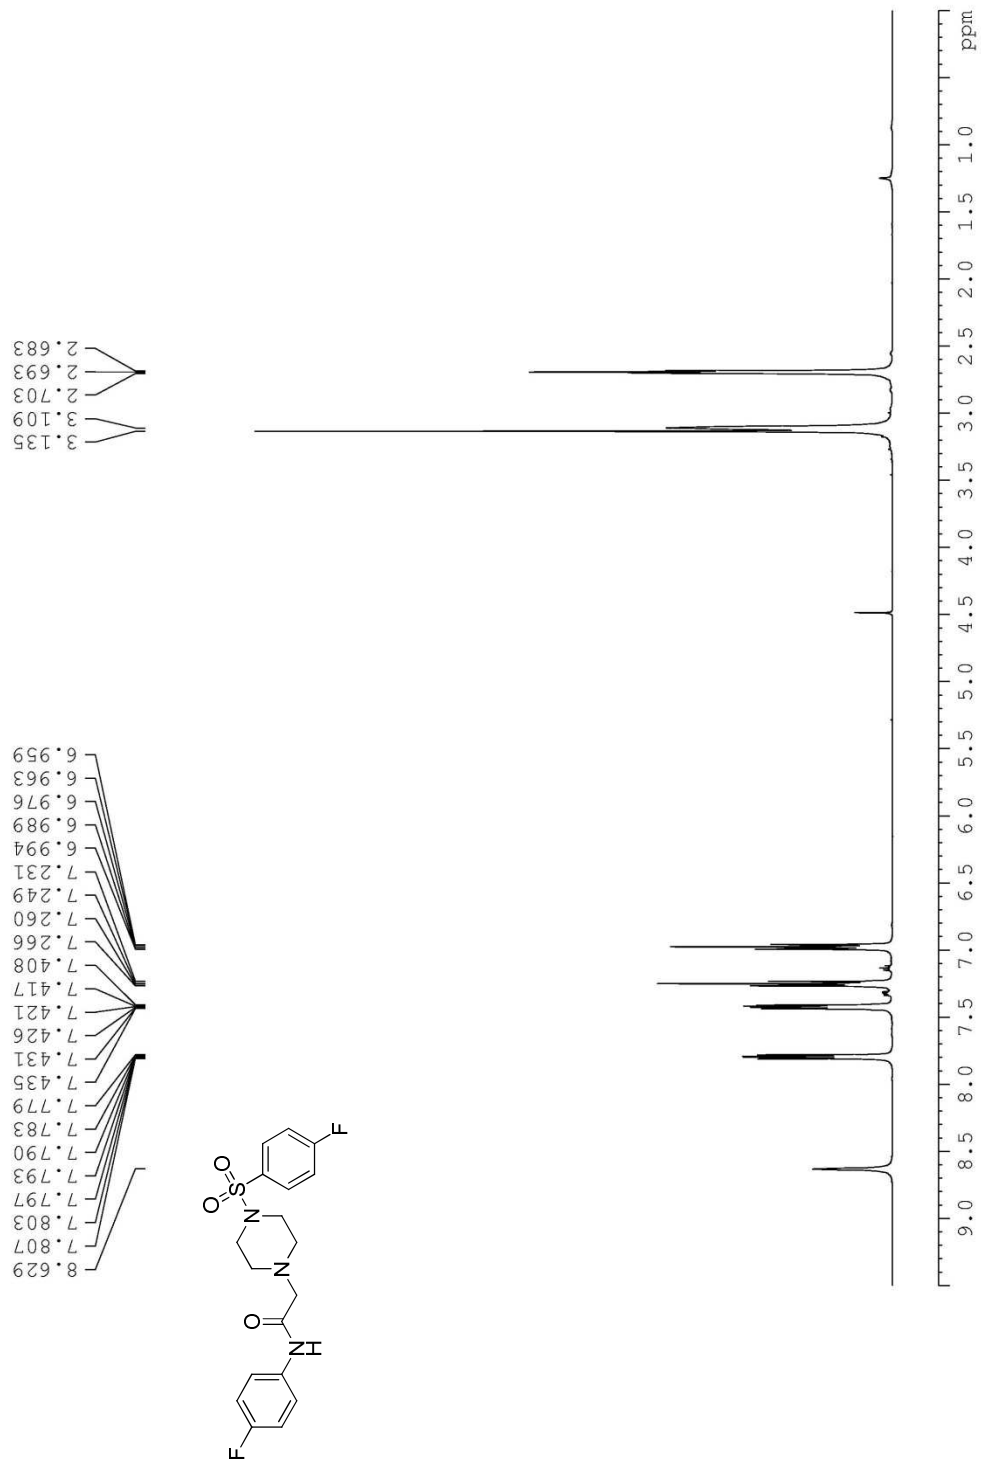

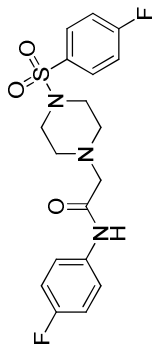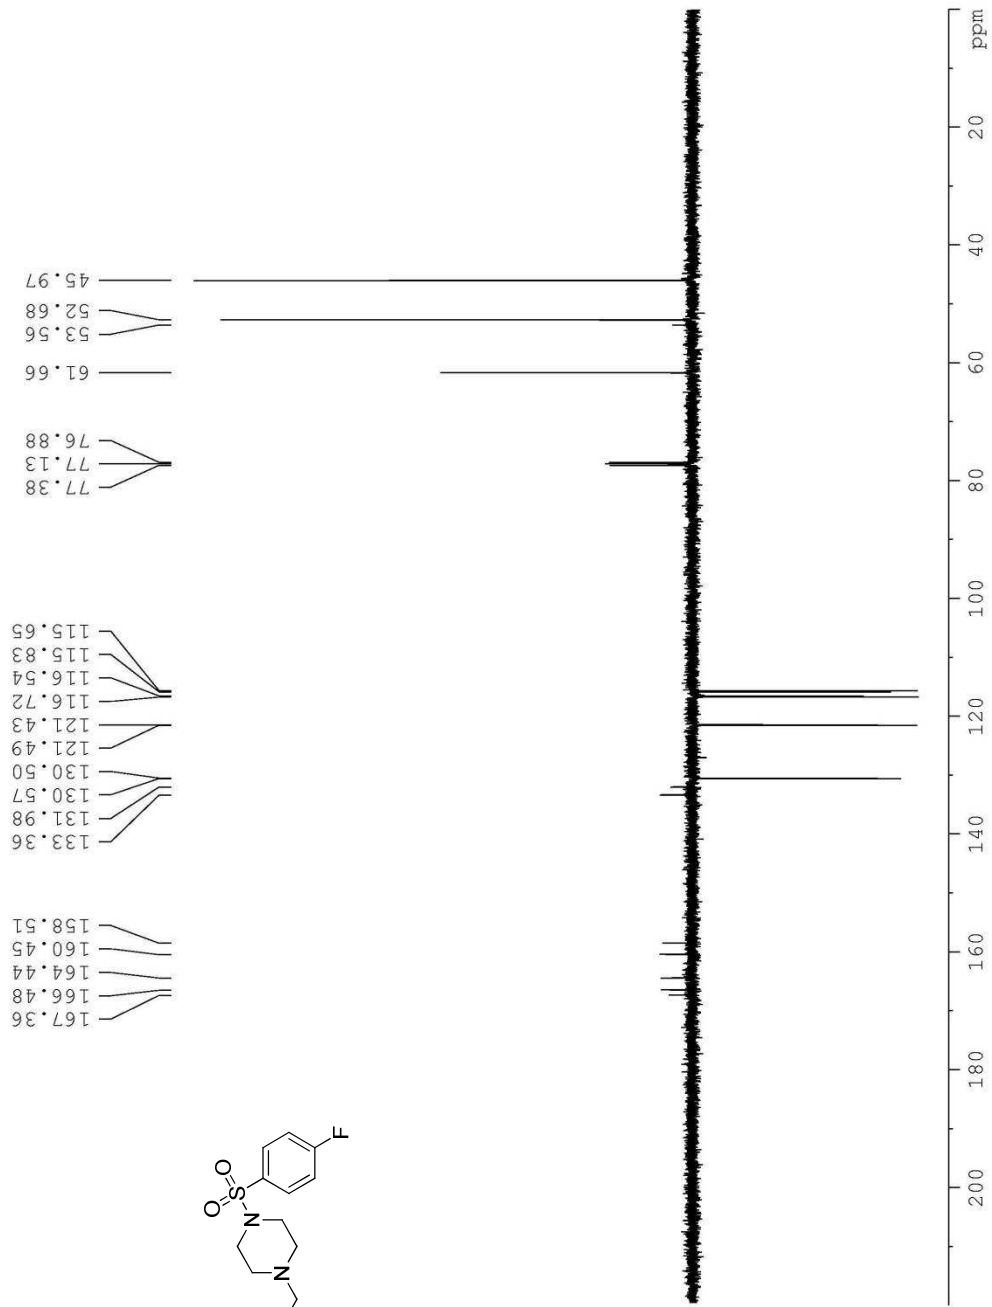



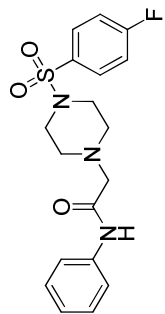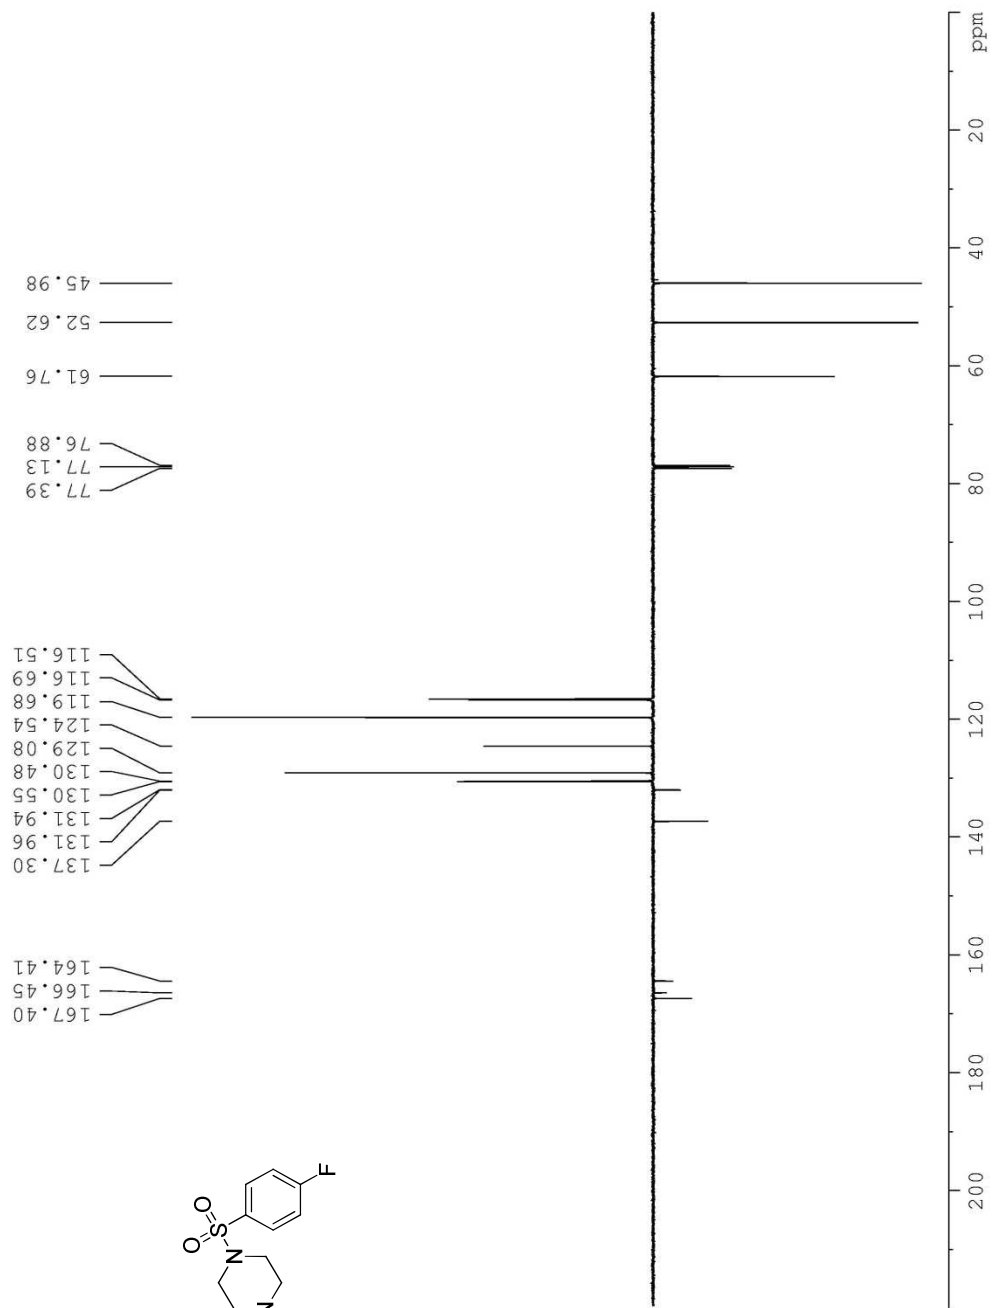



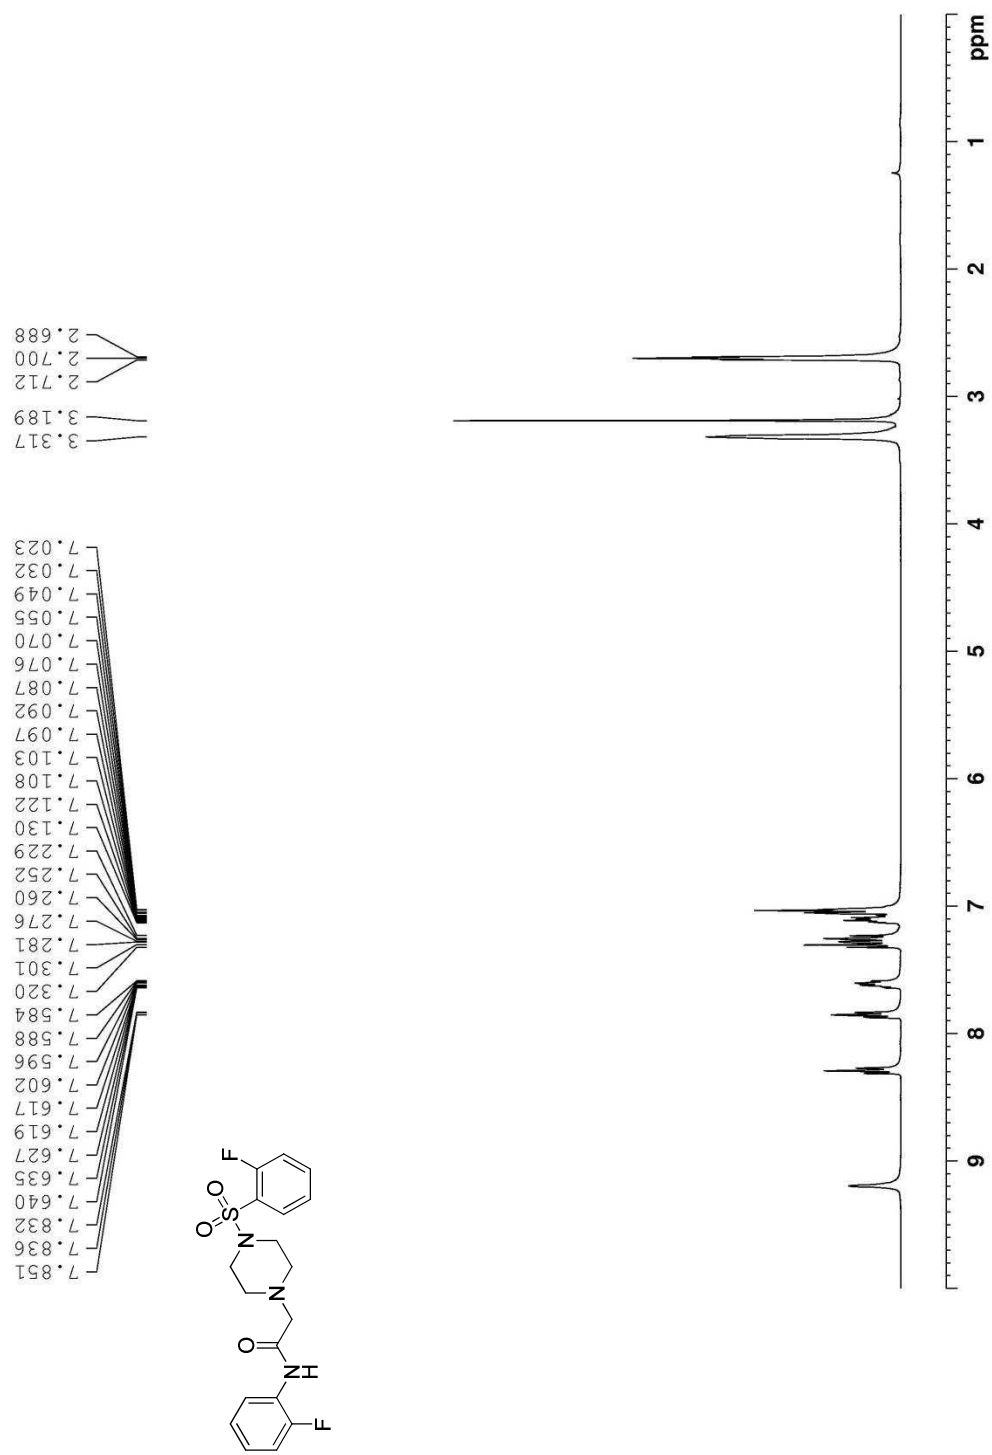

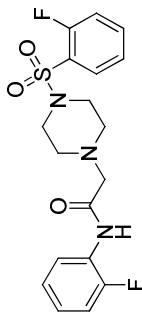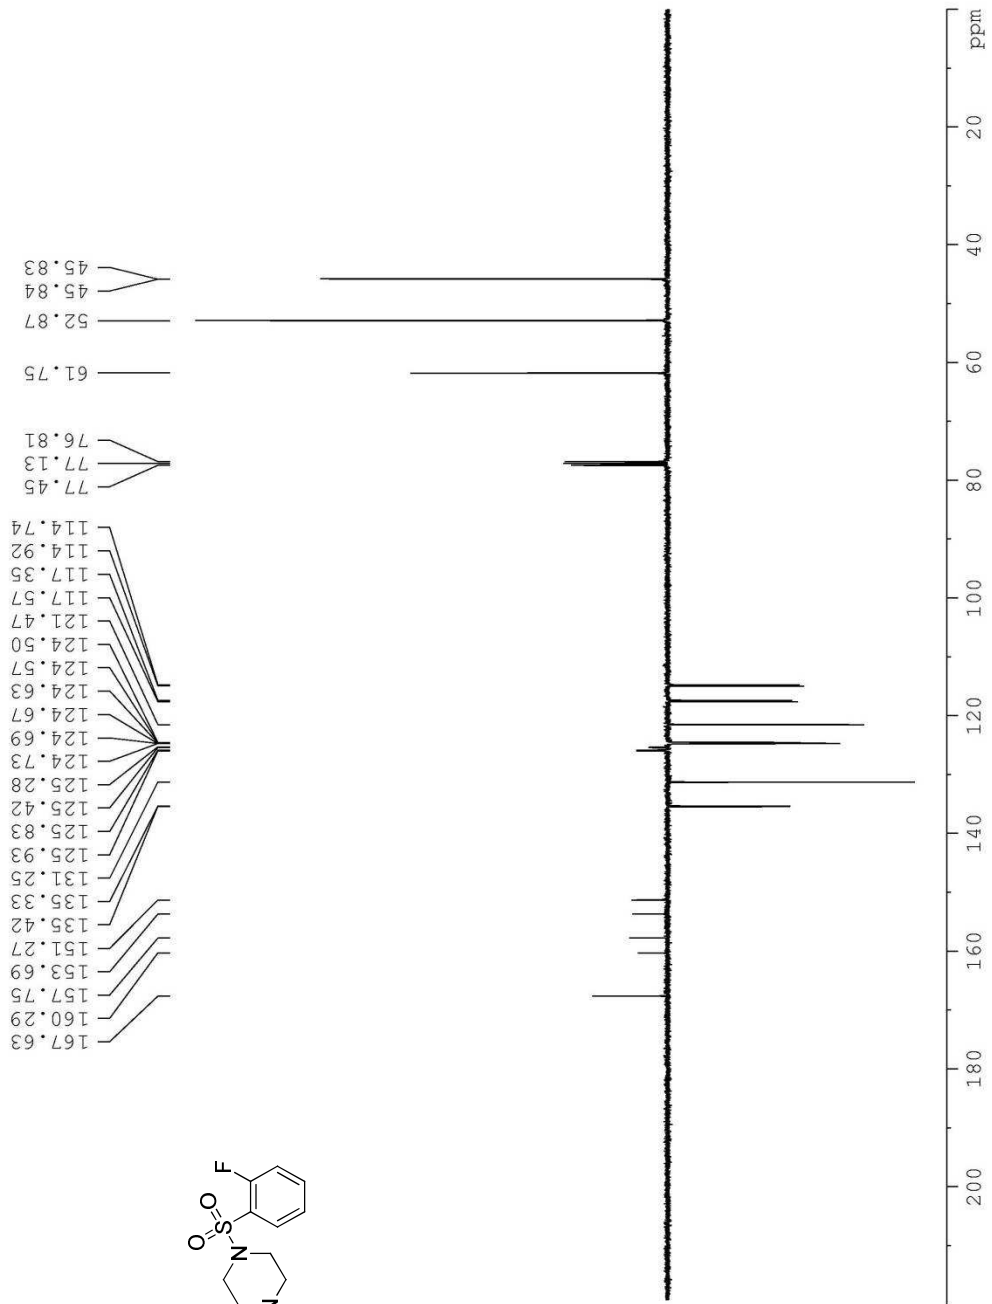

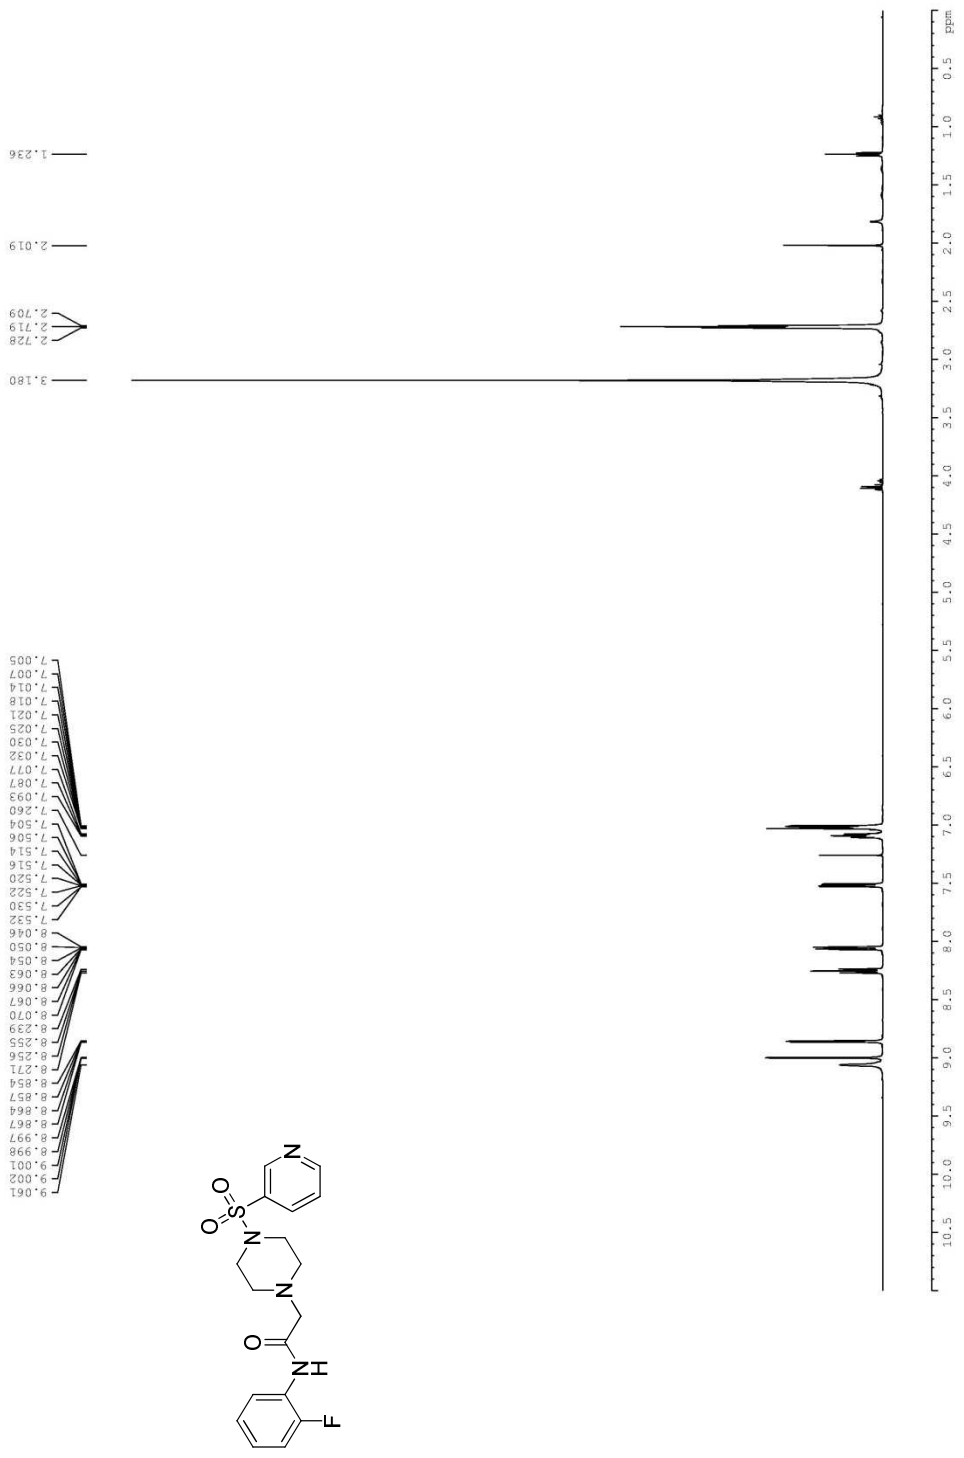

<sup>1</sup>H NMR (CDCl<sub>3</sub>, 500 MHz) of 17.

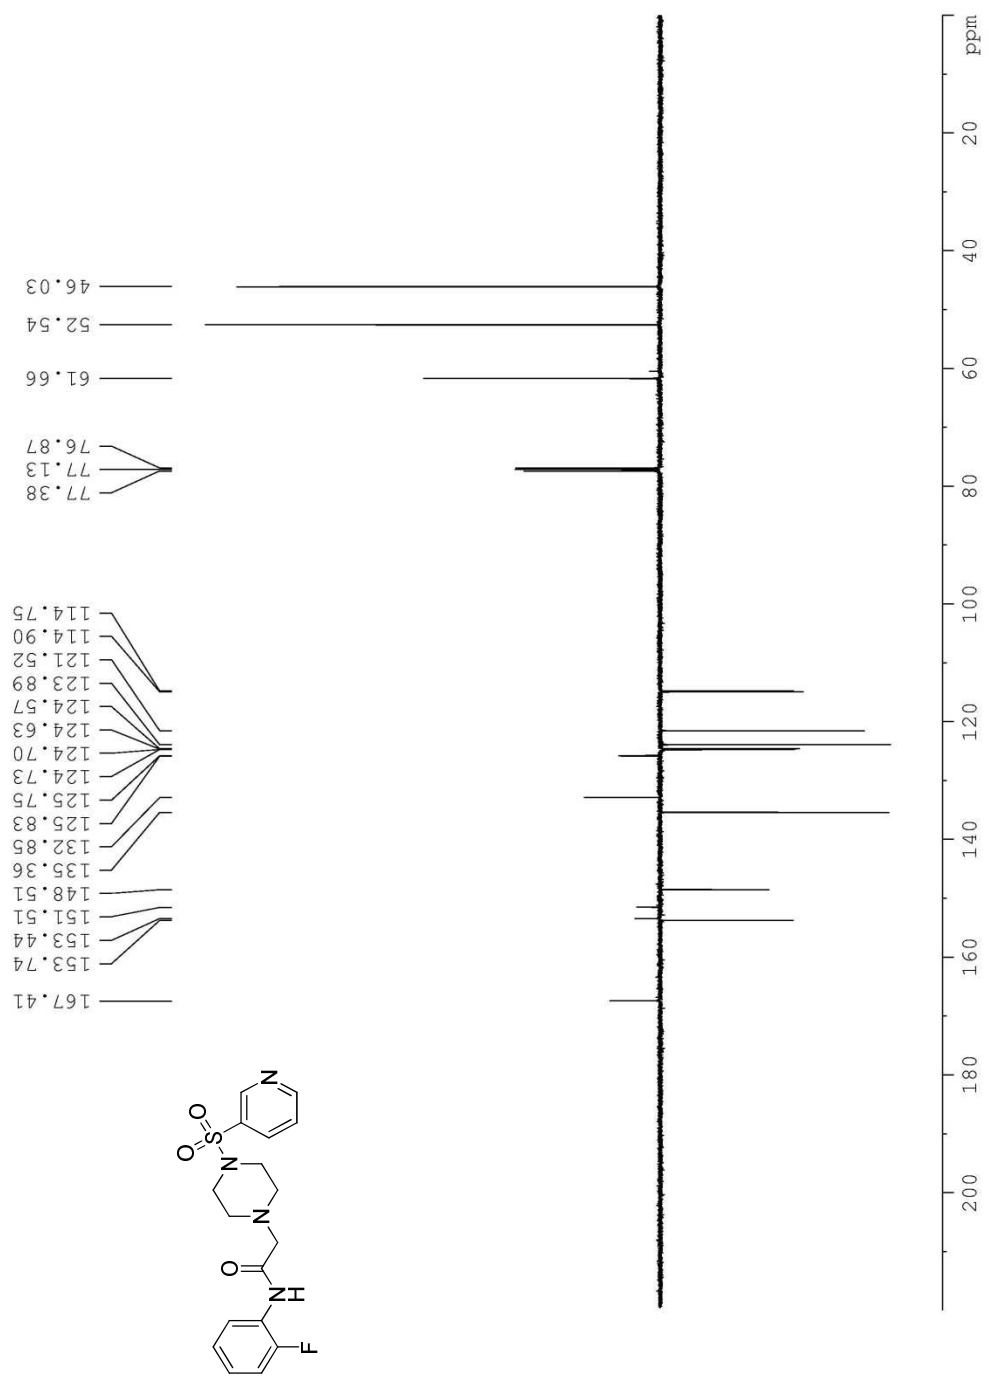

<sup>13</sup>C NMR (CDCl<sub>3</sub>, 126 MHz) of **17**.



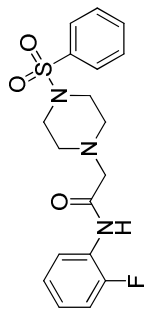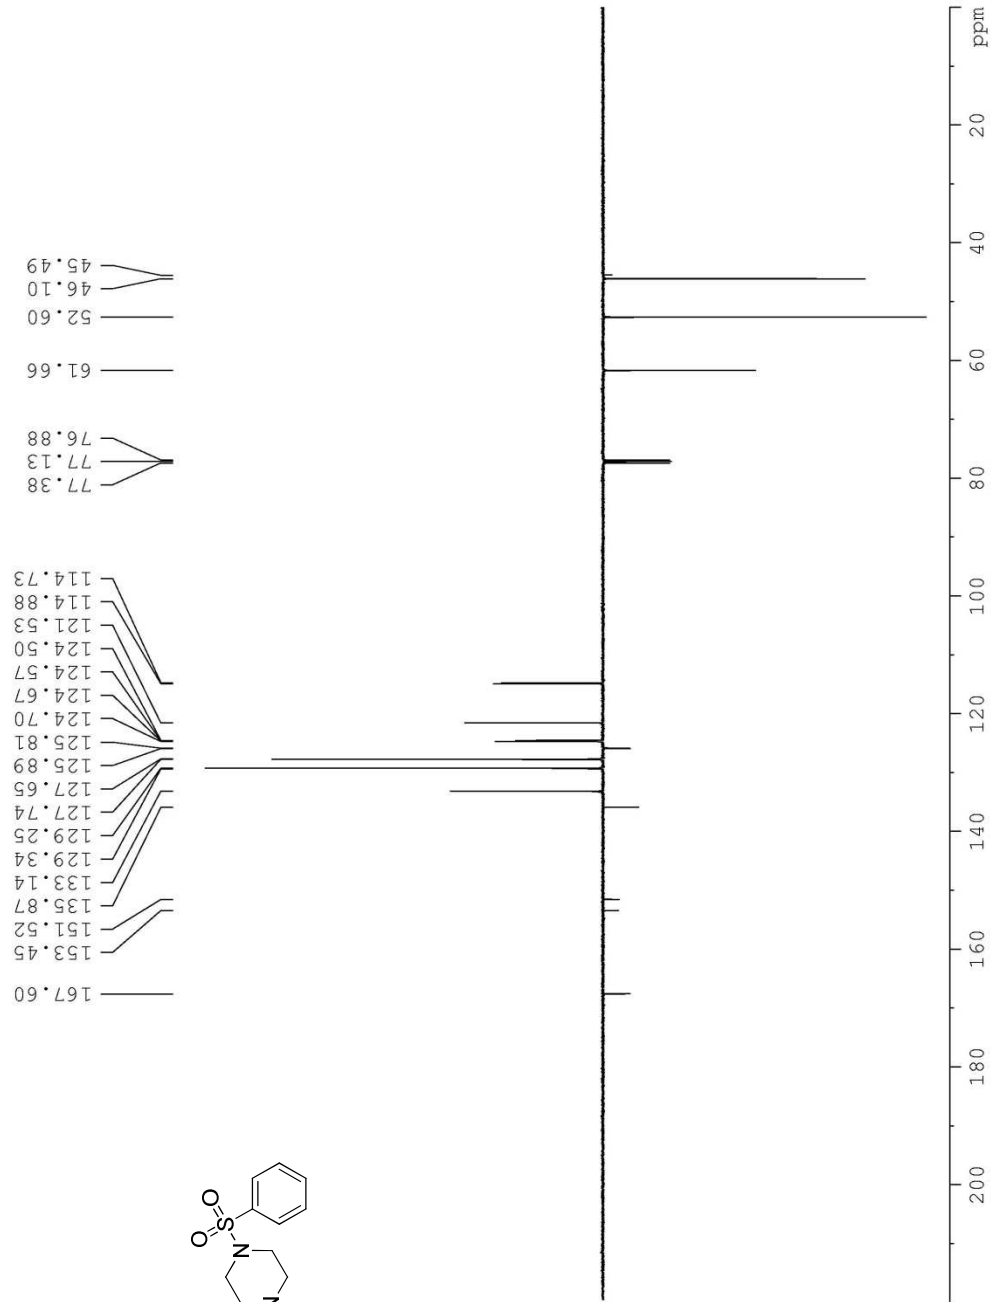

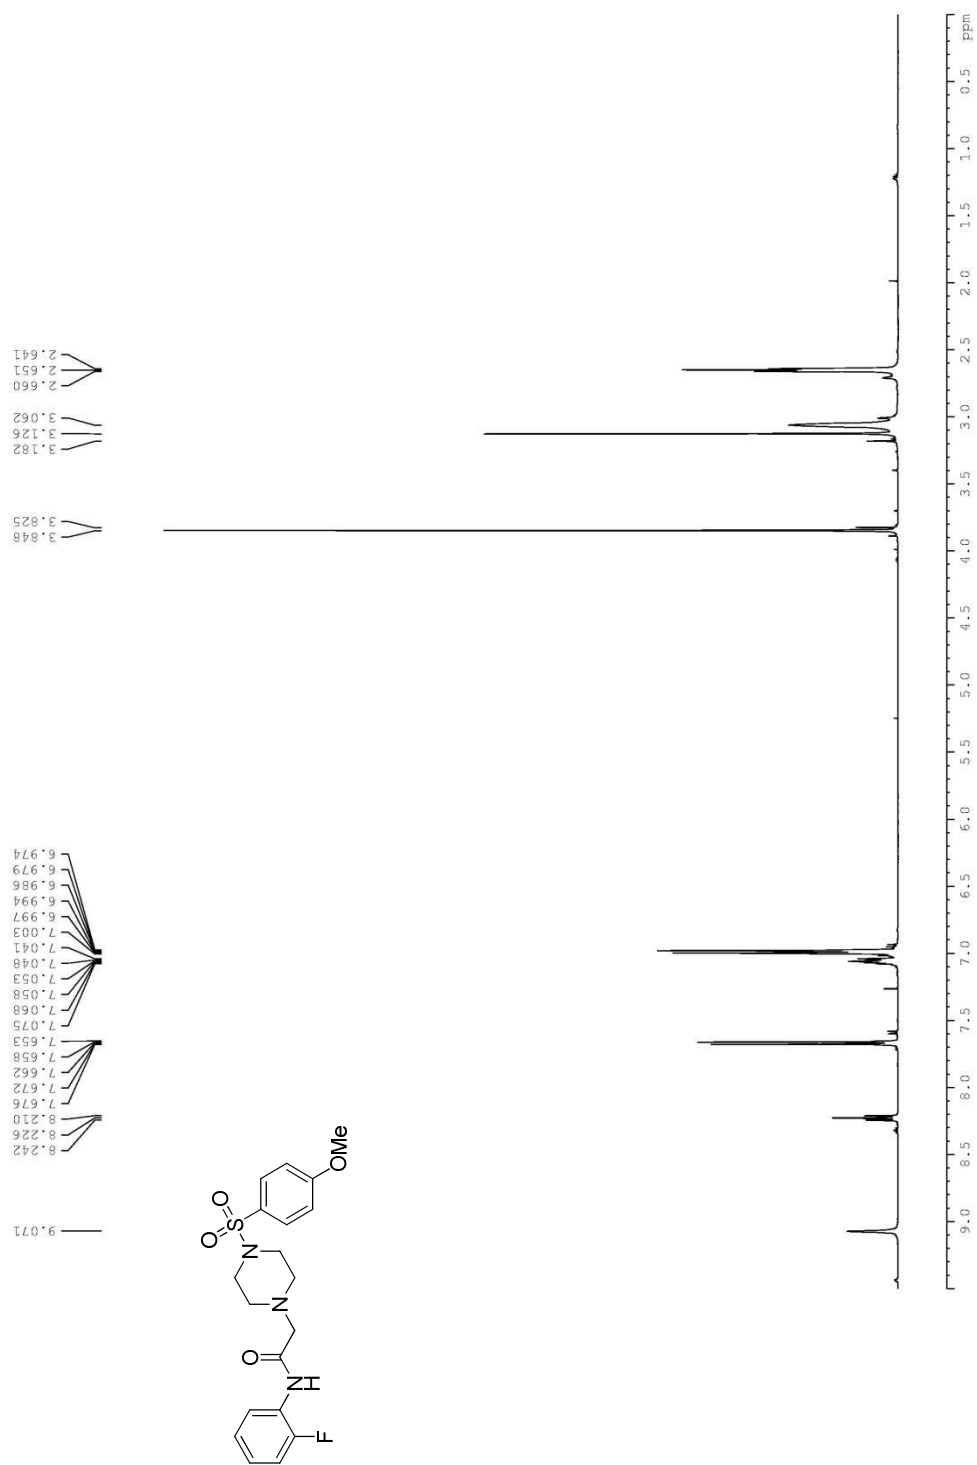

$^1\text{H}$  NMR ( $\text{CDCl}_3$ , 500 MHz) of **19**.

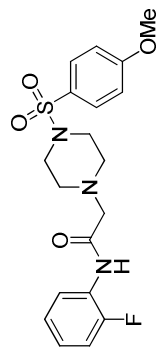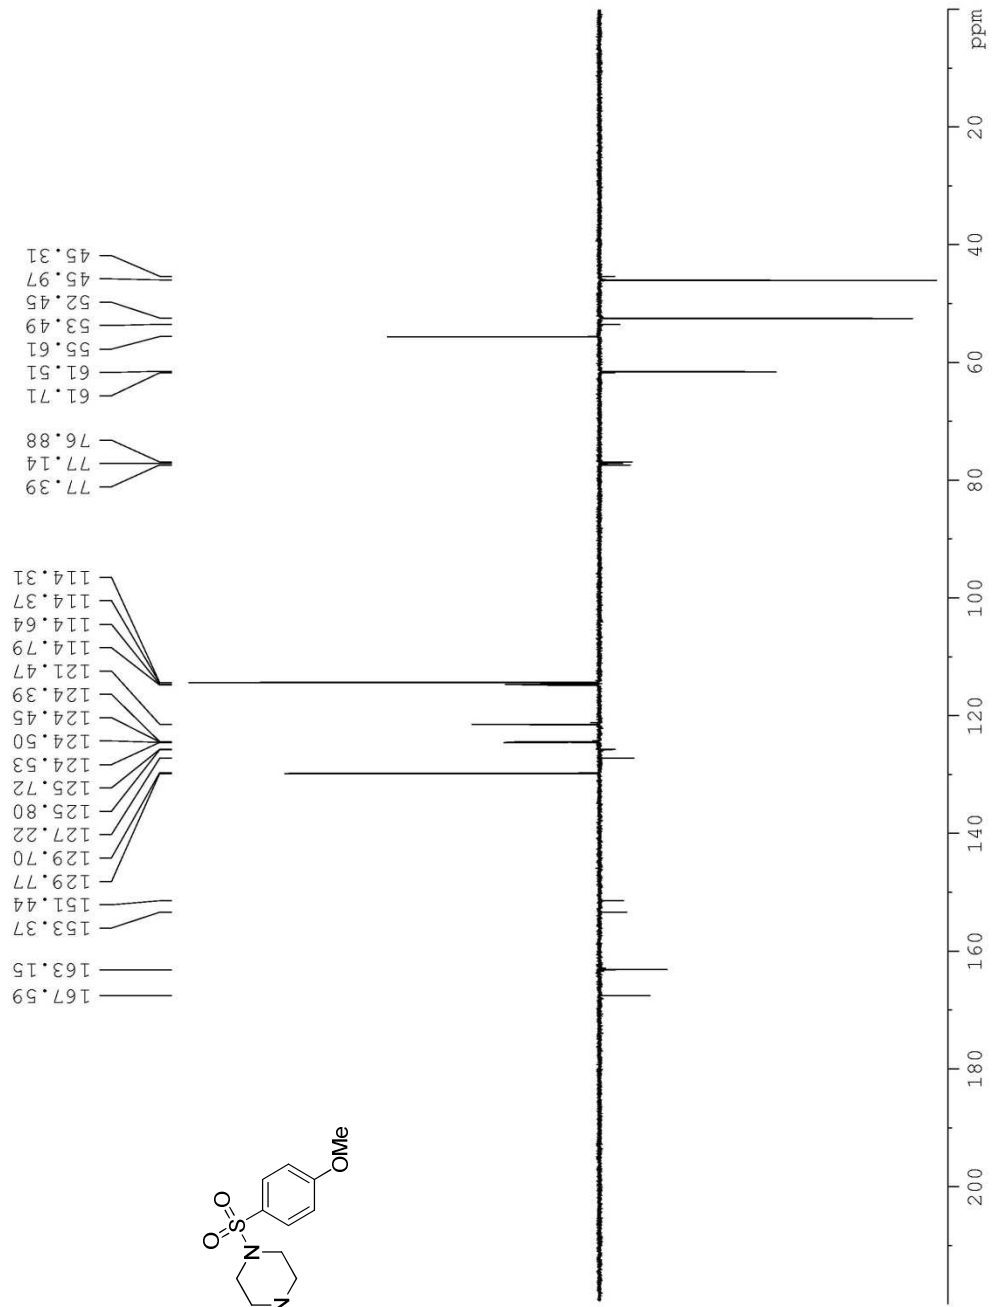



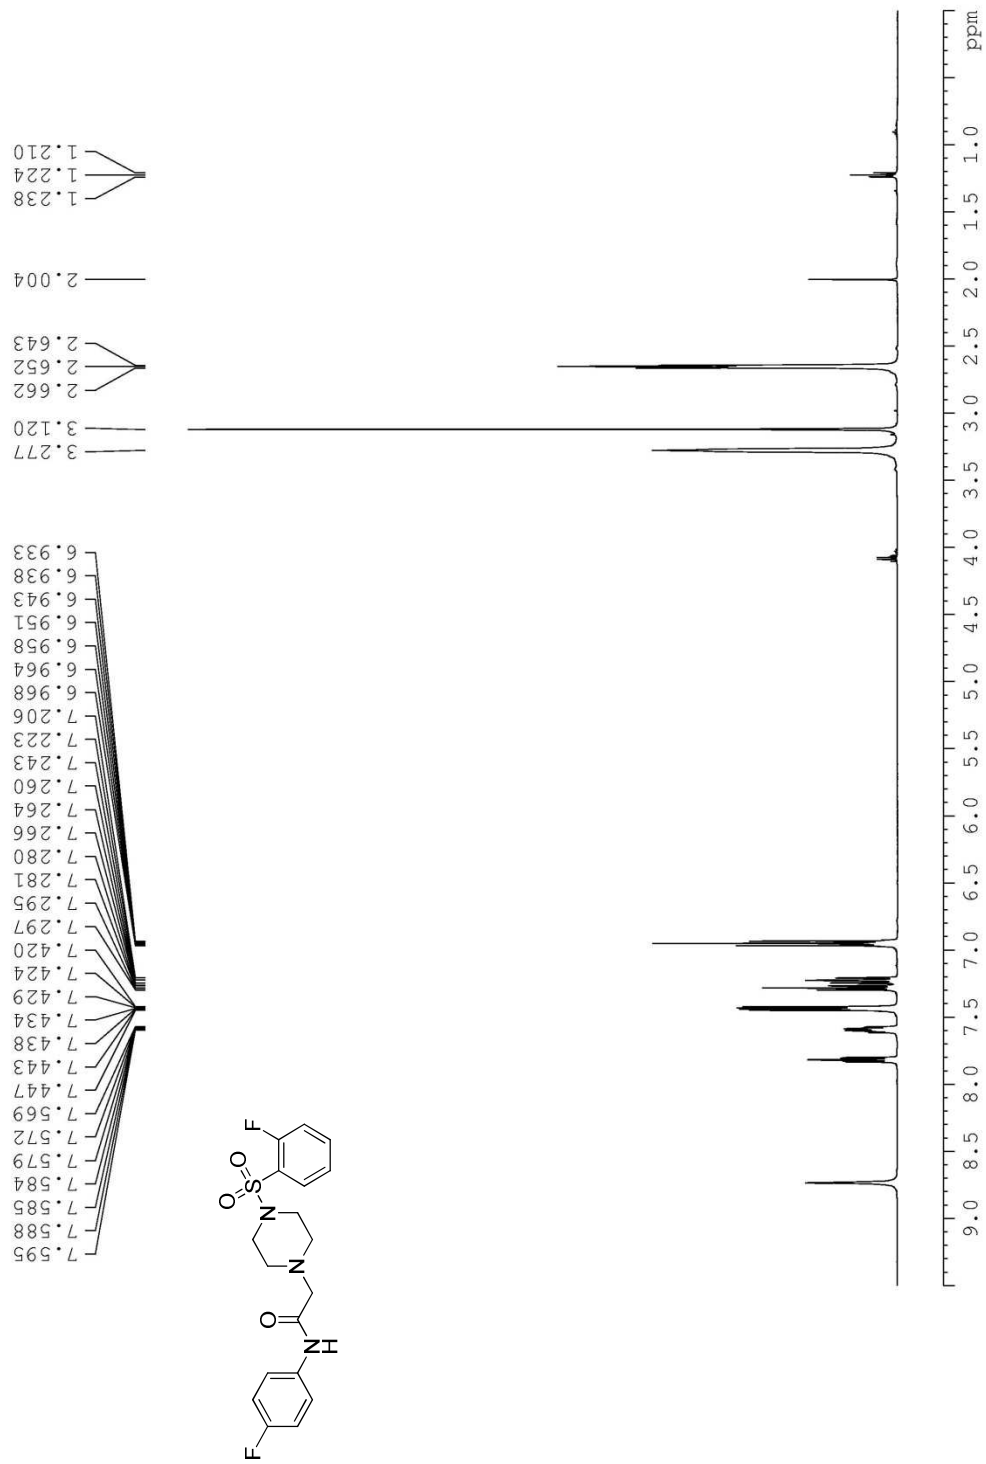

<sup>1</sup>H NMR (CDCl<sub>3</sub>, 500 MHz) of 20.

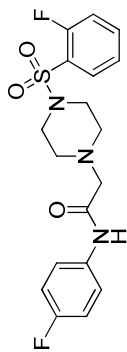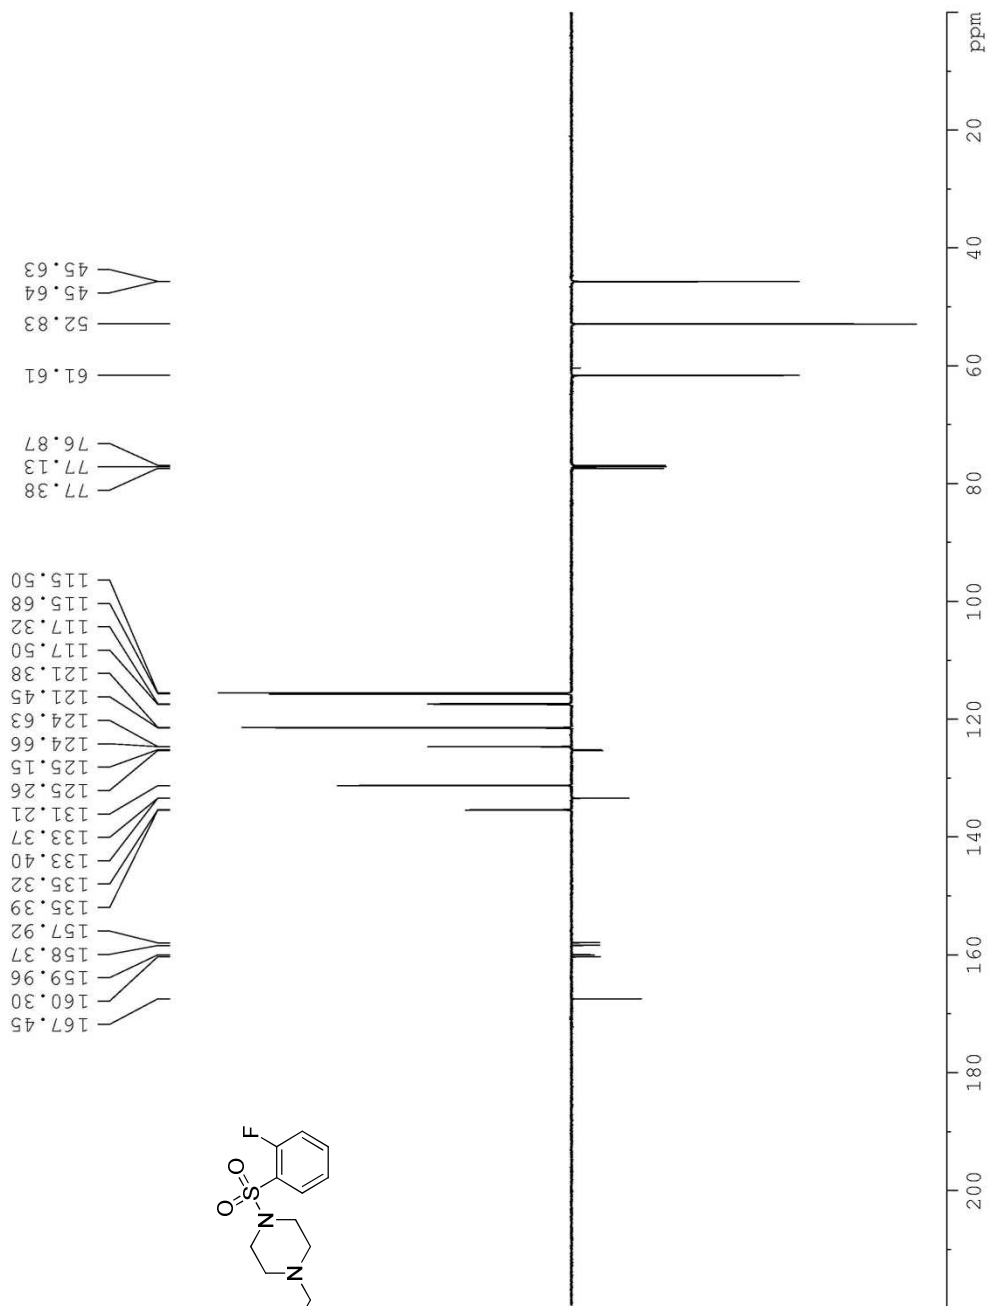

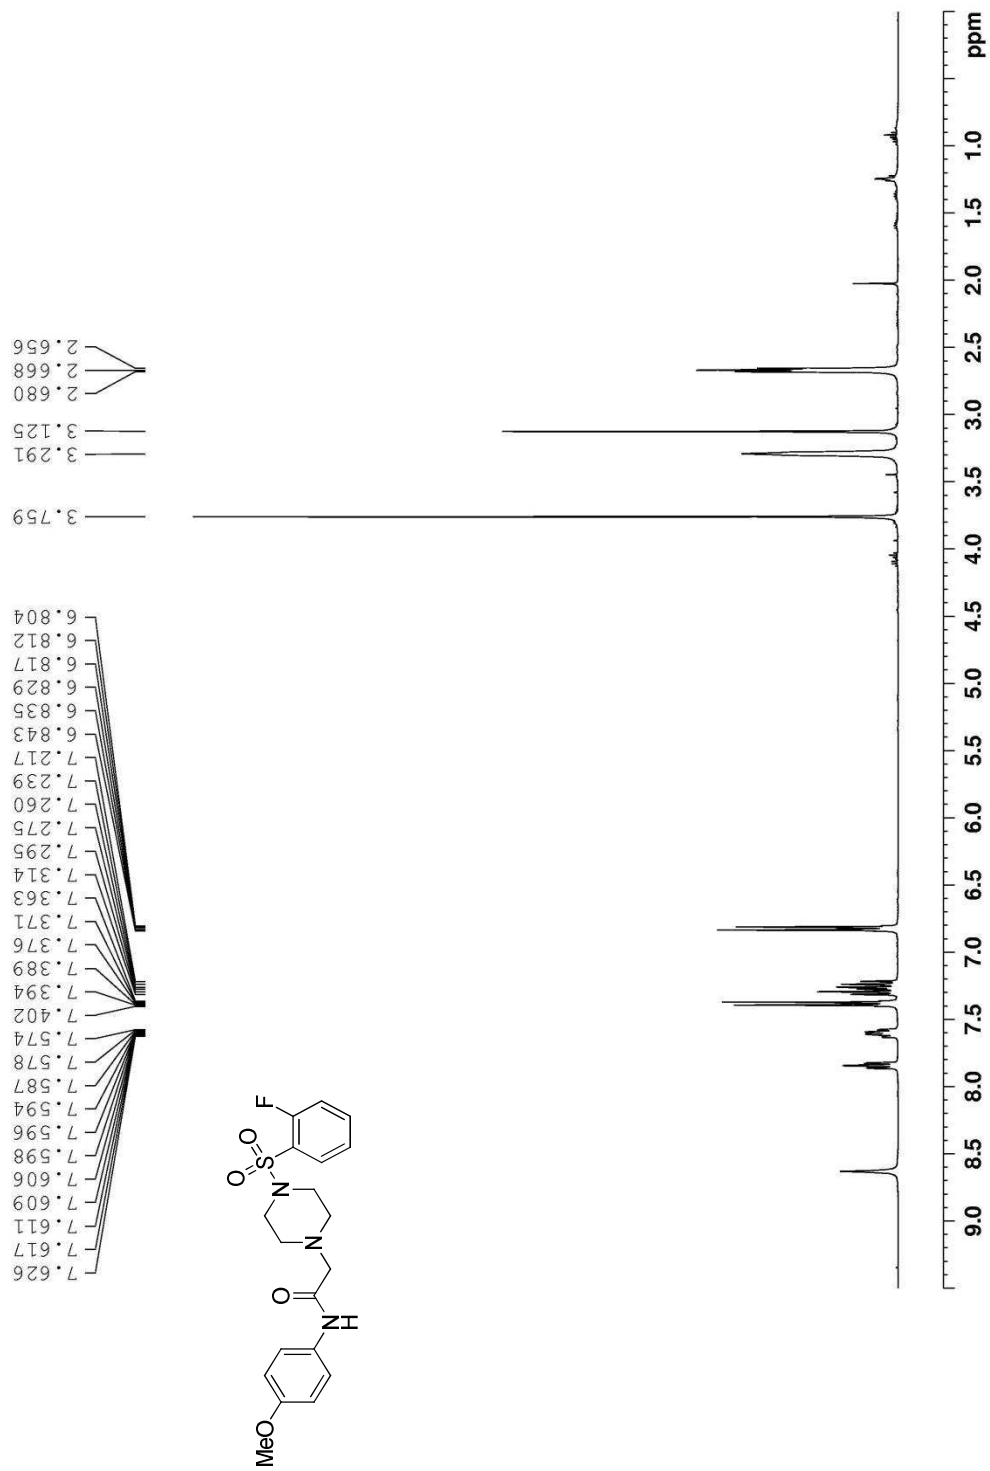

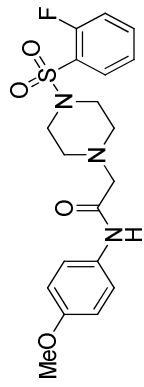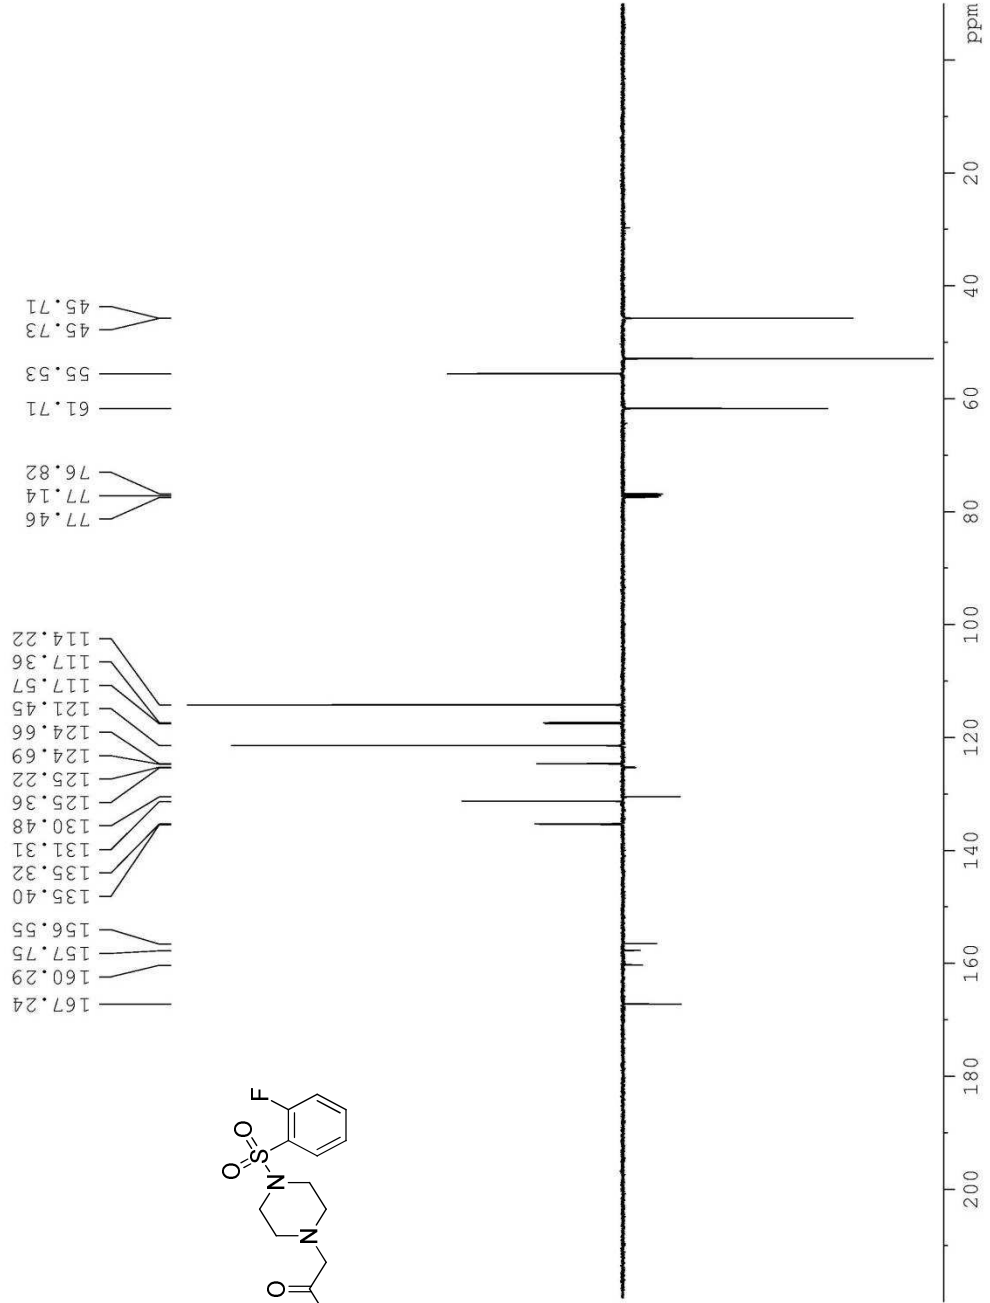

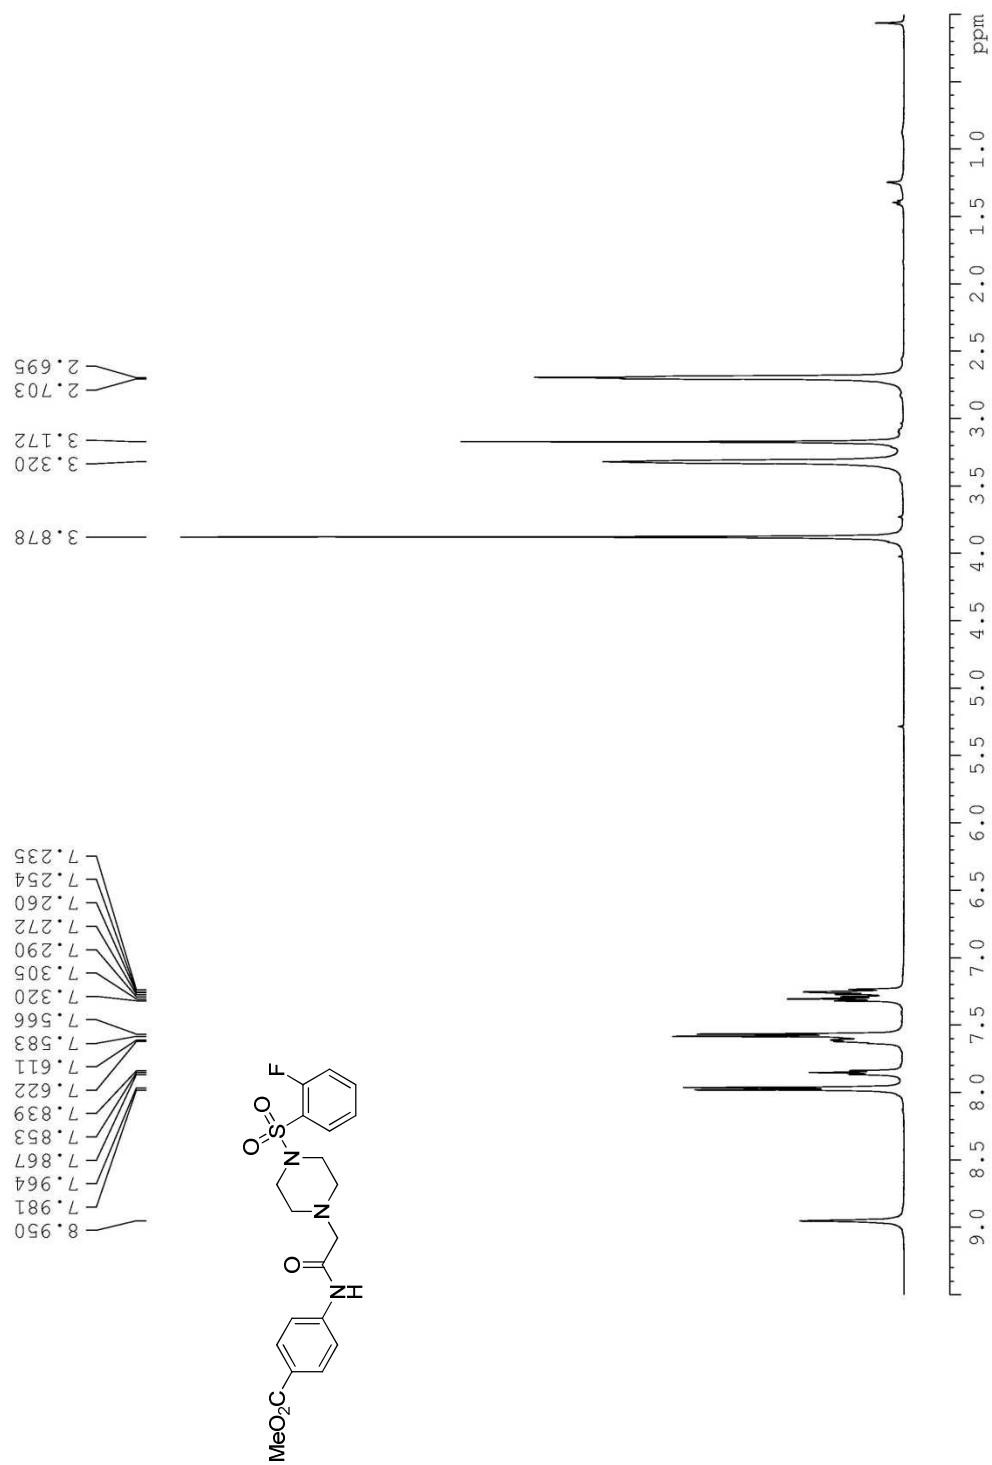

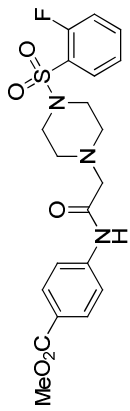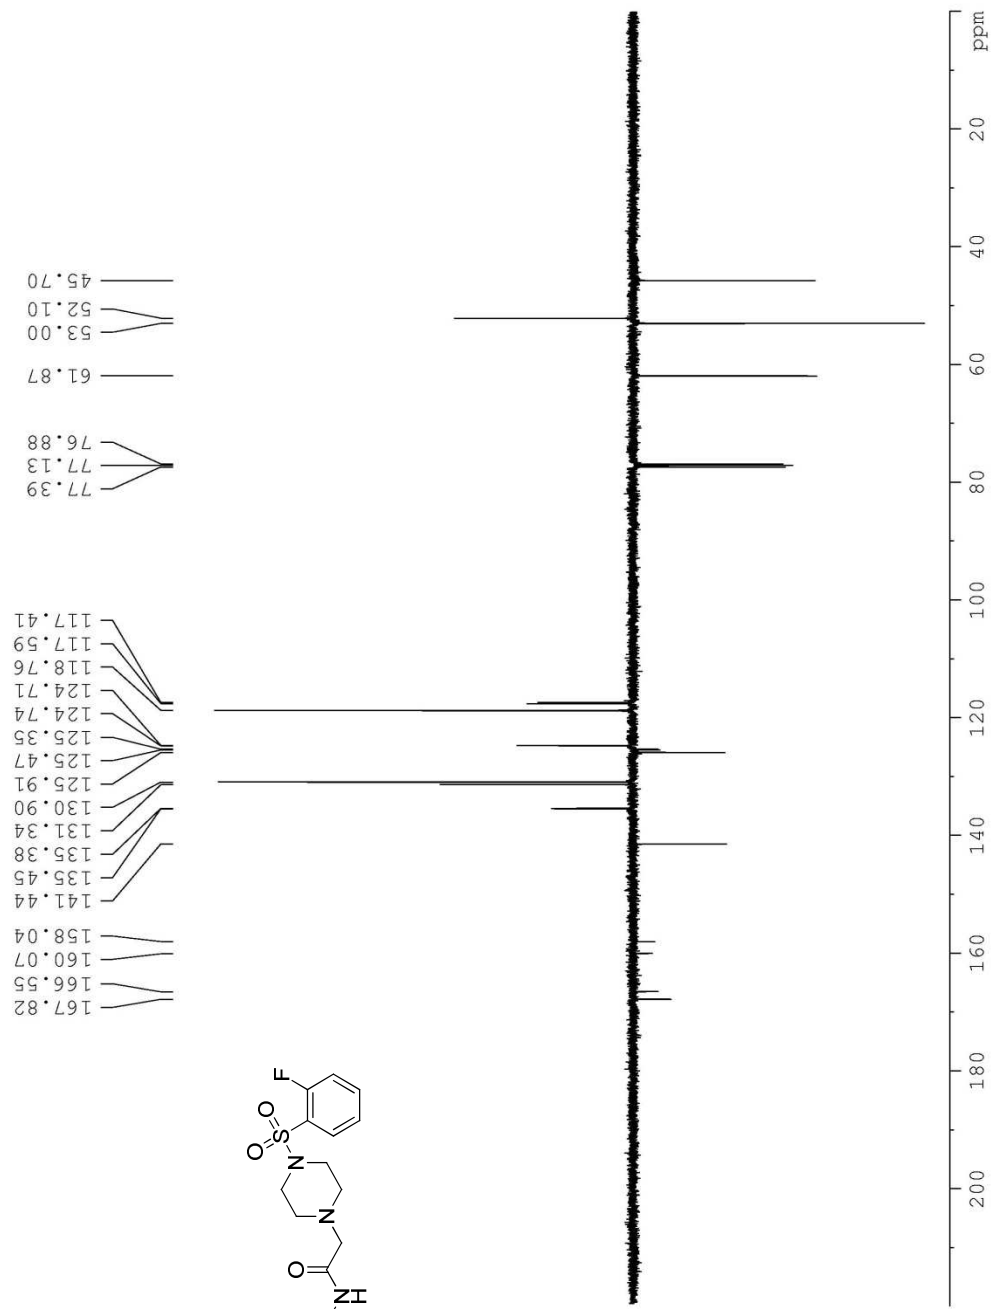

$^{13}\text{C}$  NMR ( $\text{CDCl}_3$ , 126 MHz) of **22**.

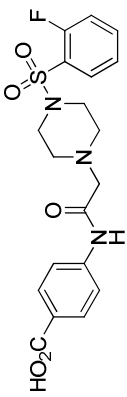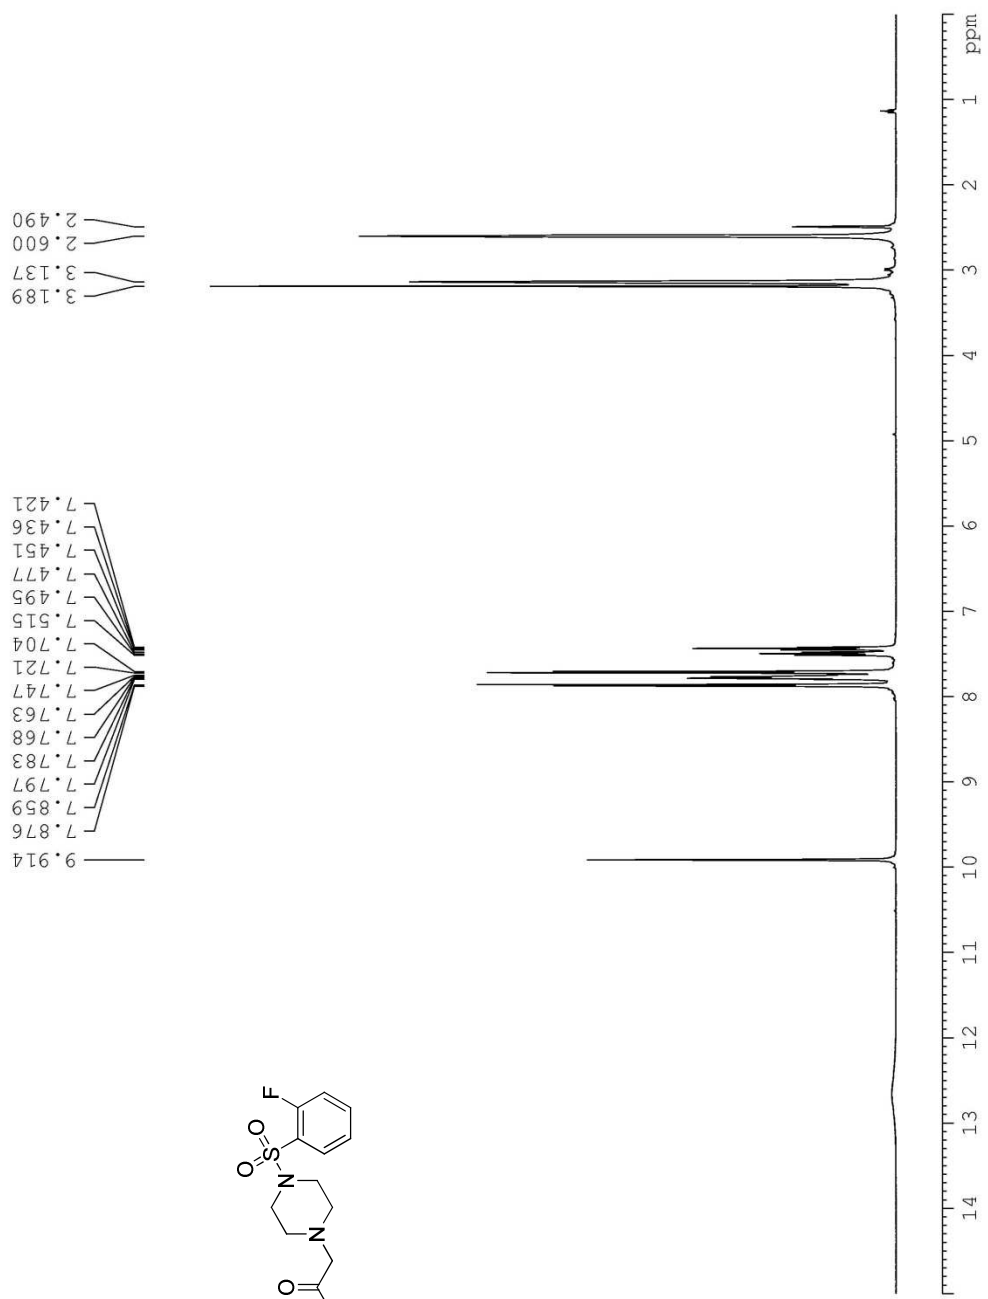

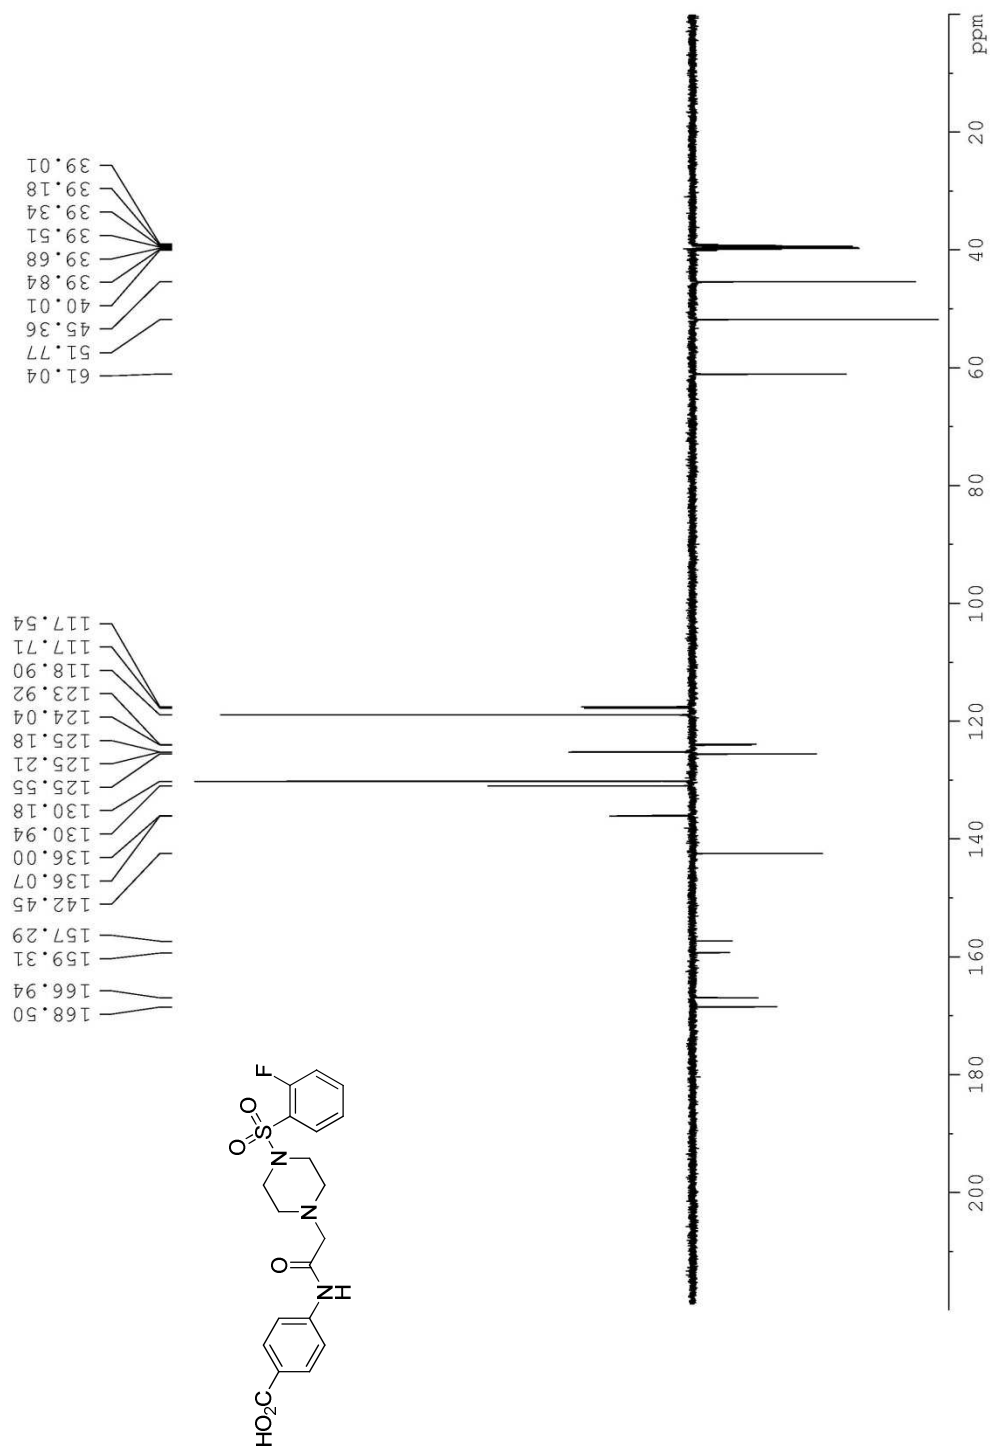



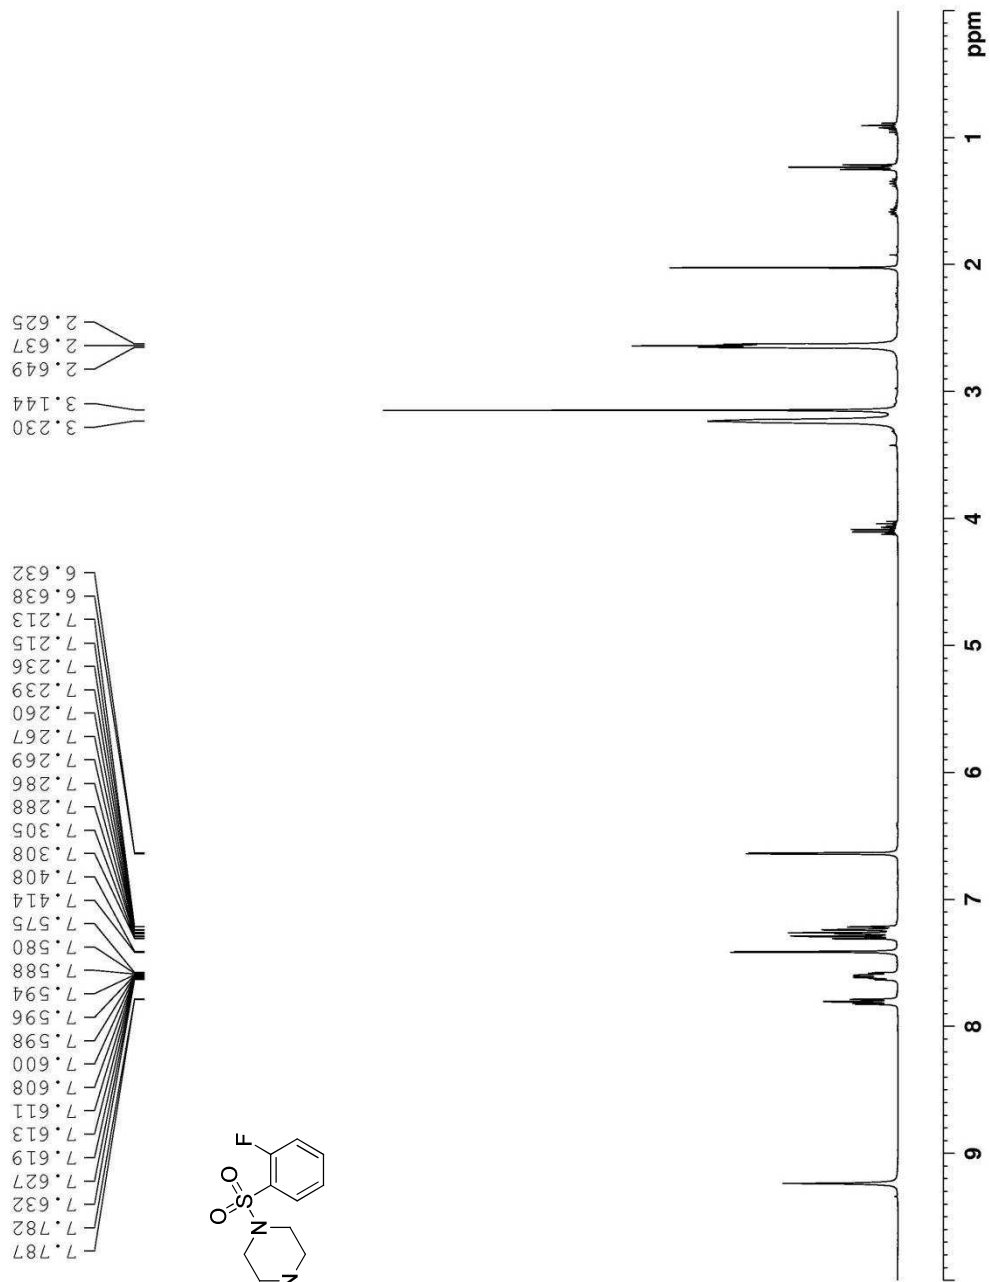

<sup>1</sup>H NMR (CDCl<sub>3</sub>, 400 MHz) of 24.

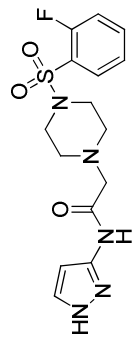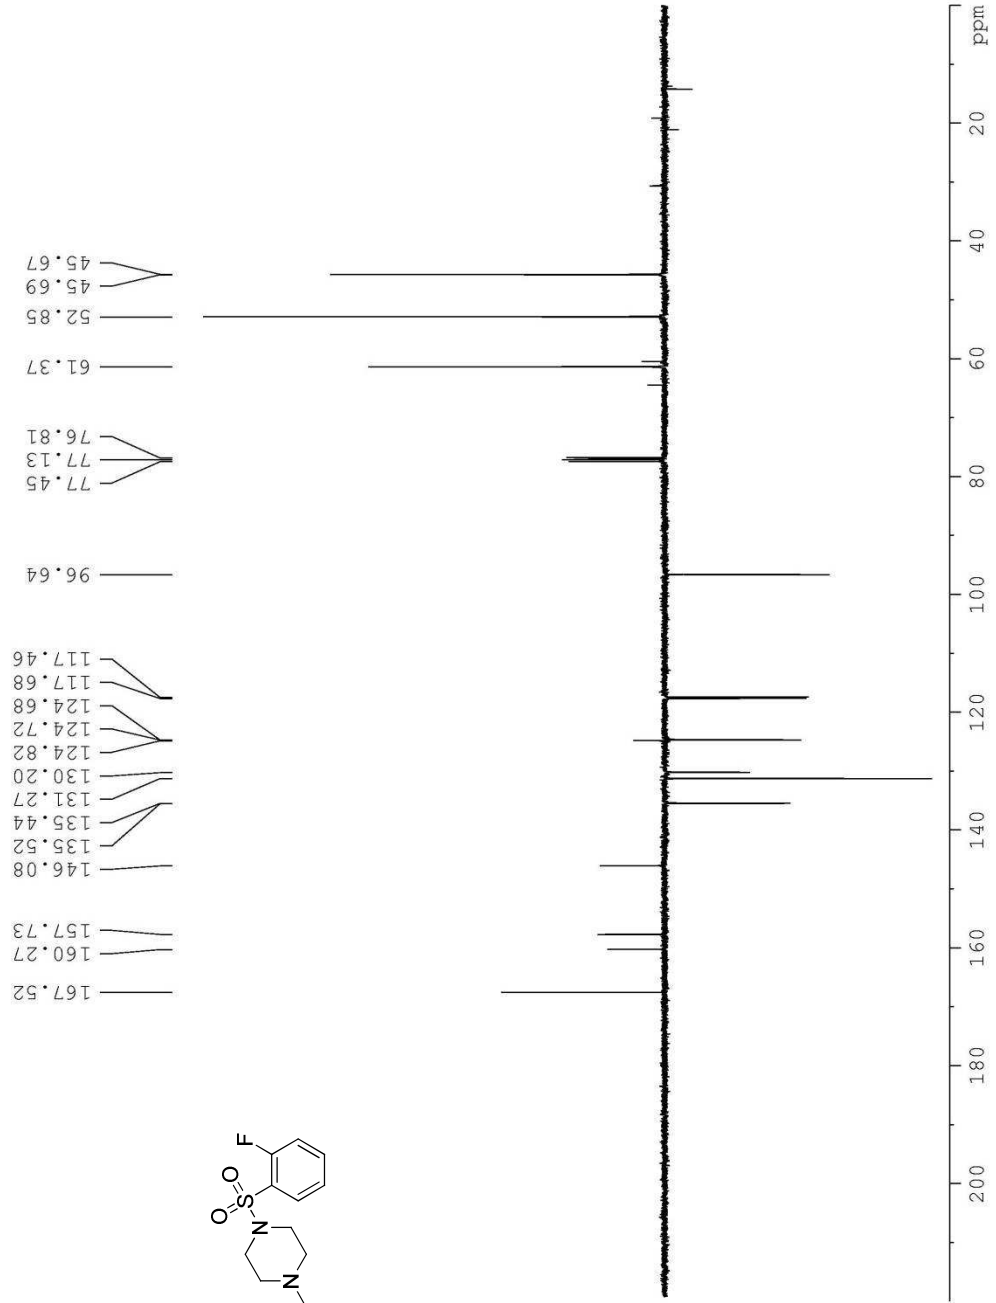

<sup>13</sup>C NMR (CDCl<sub>3</sub>, 101 MHz) of **24**.

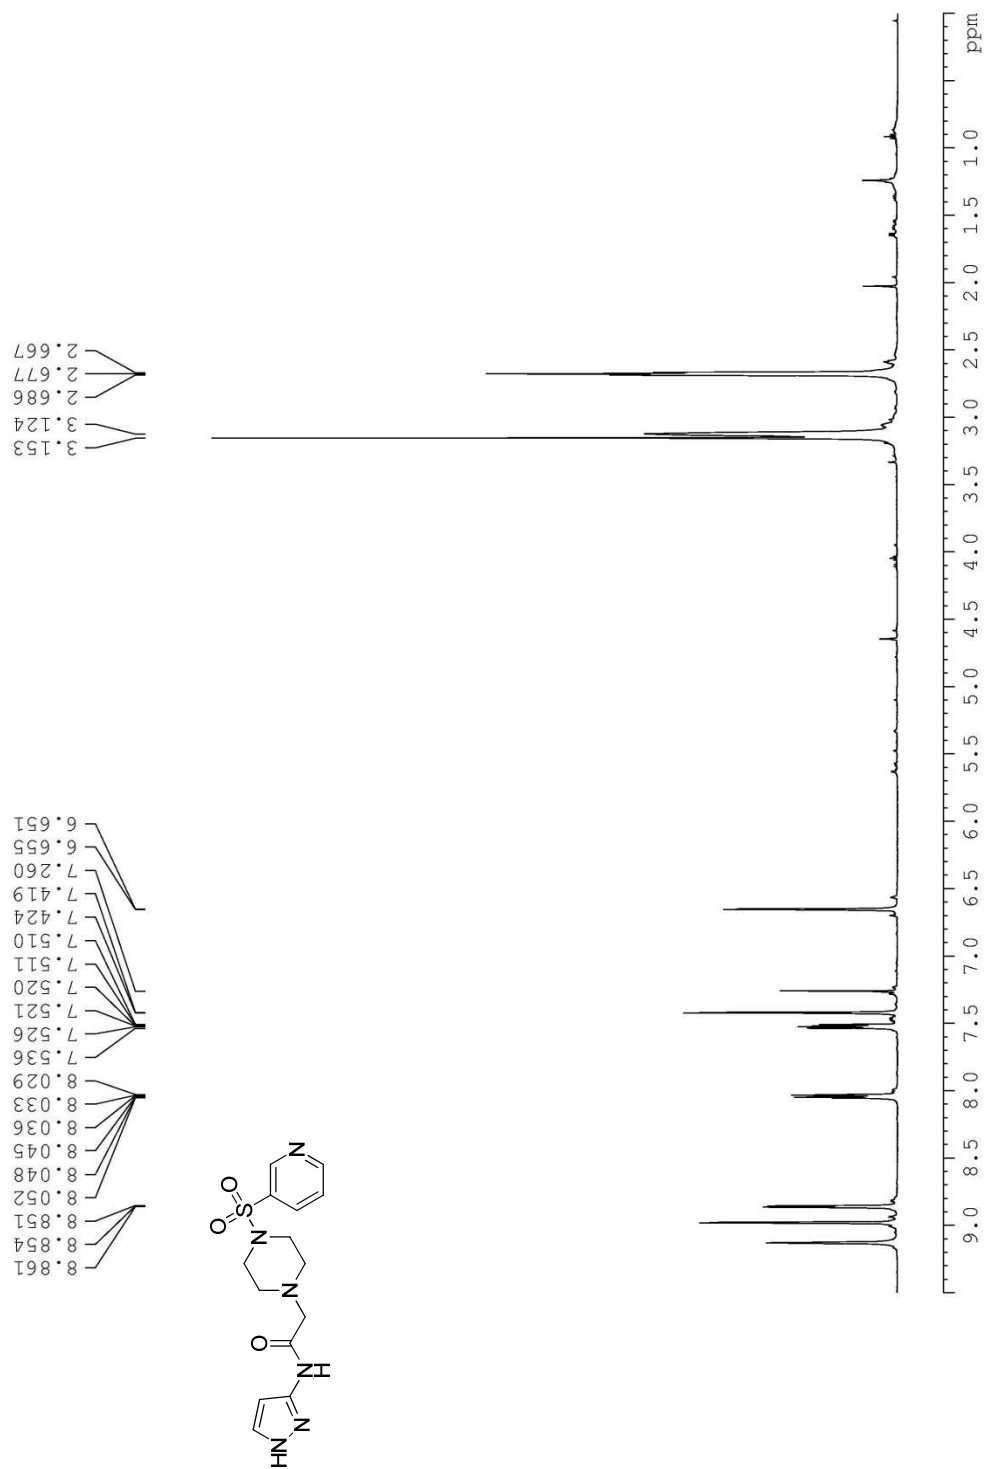

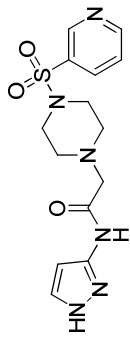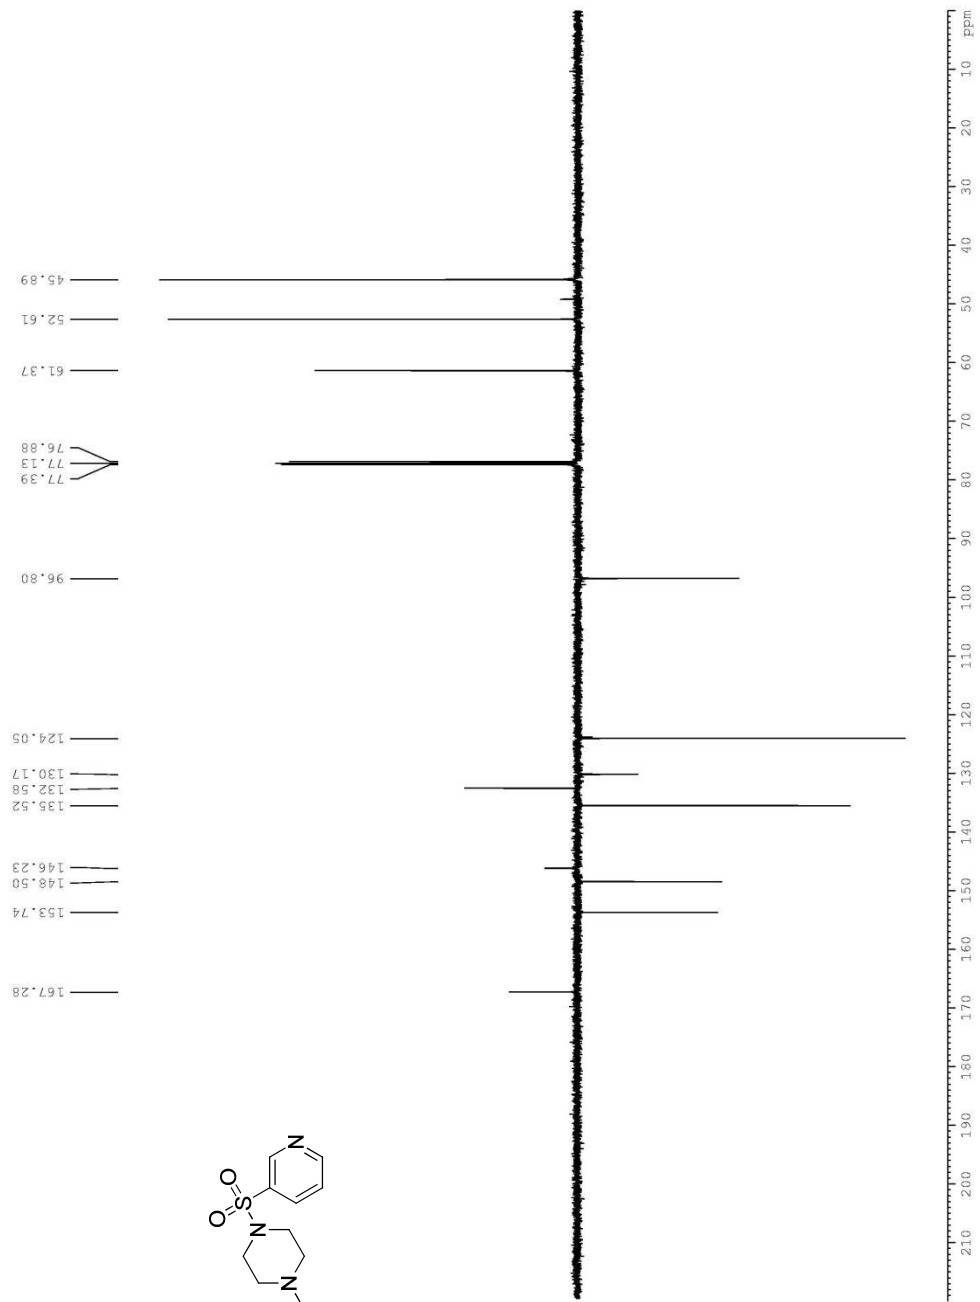

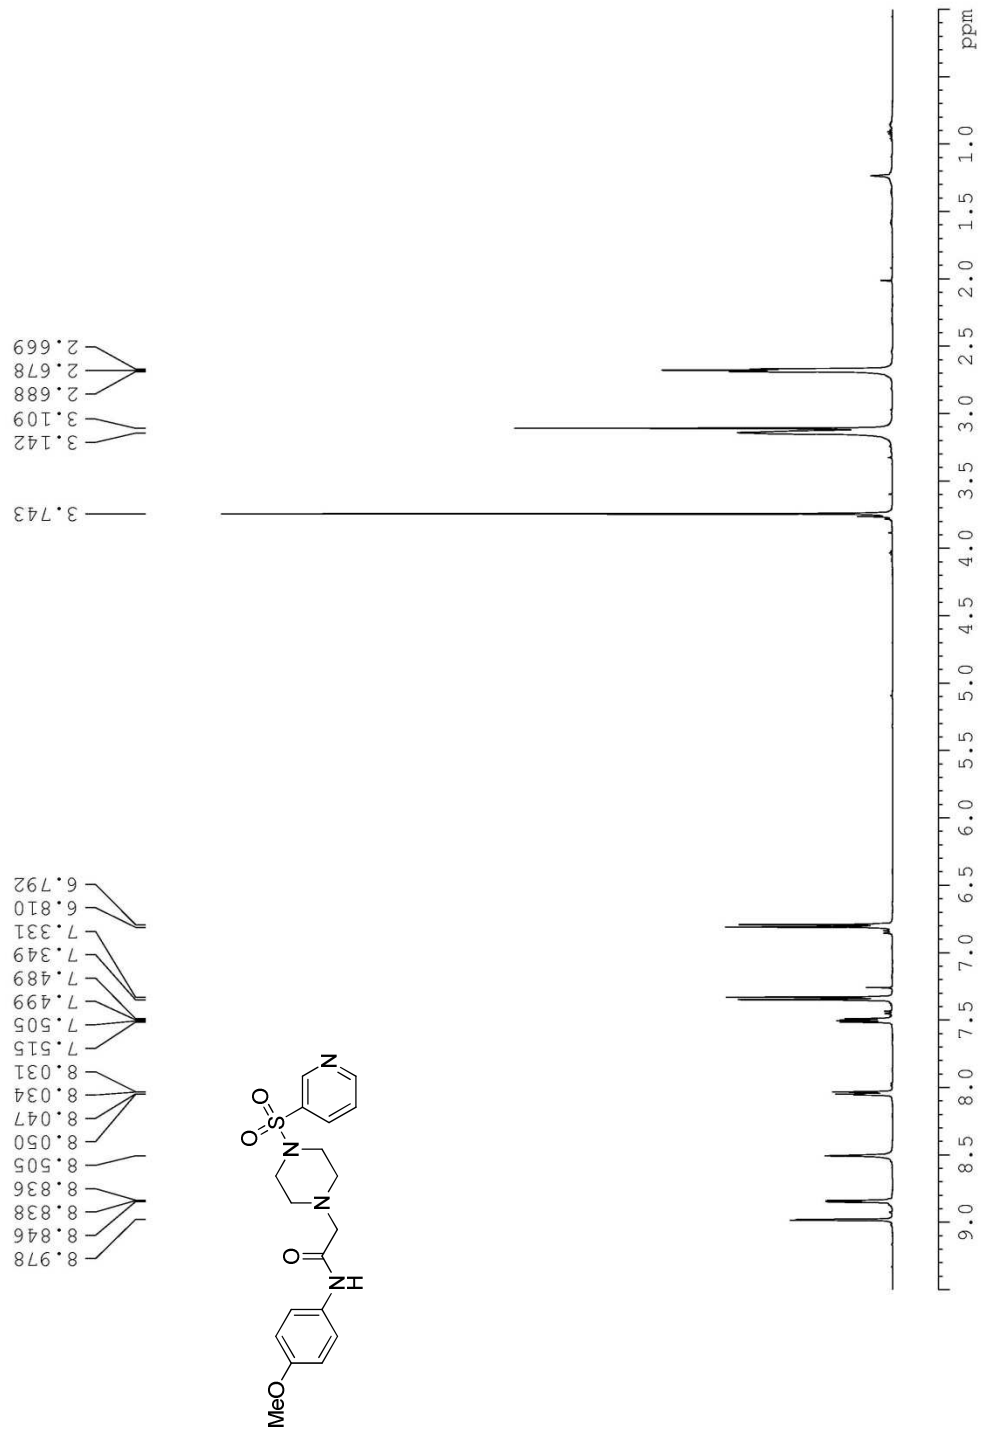

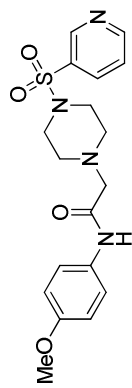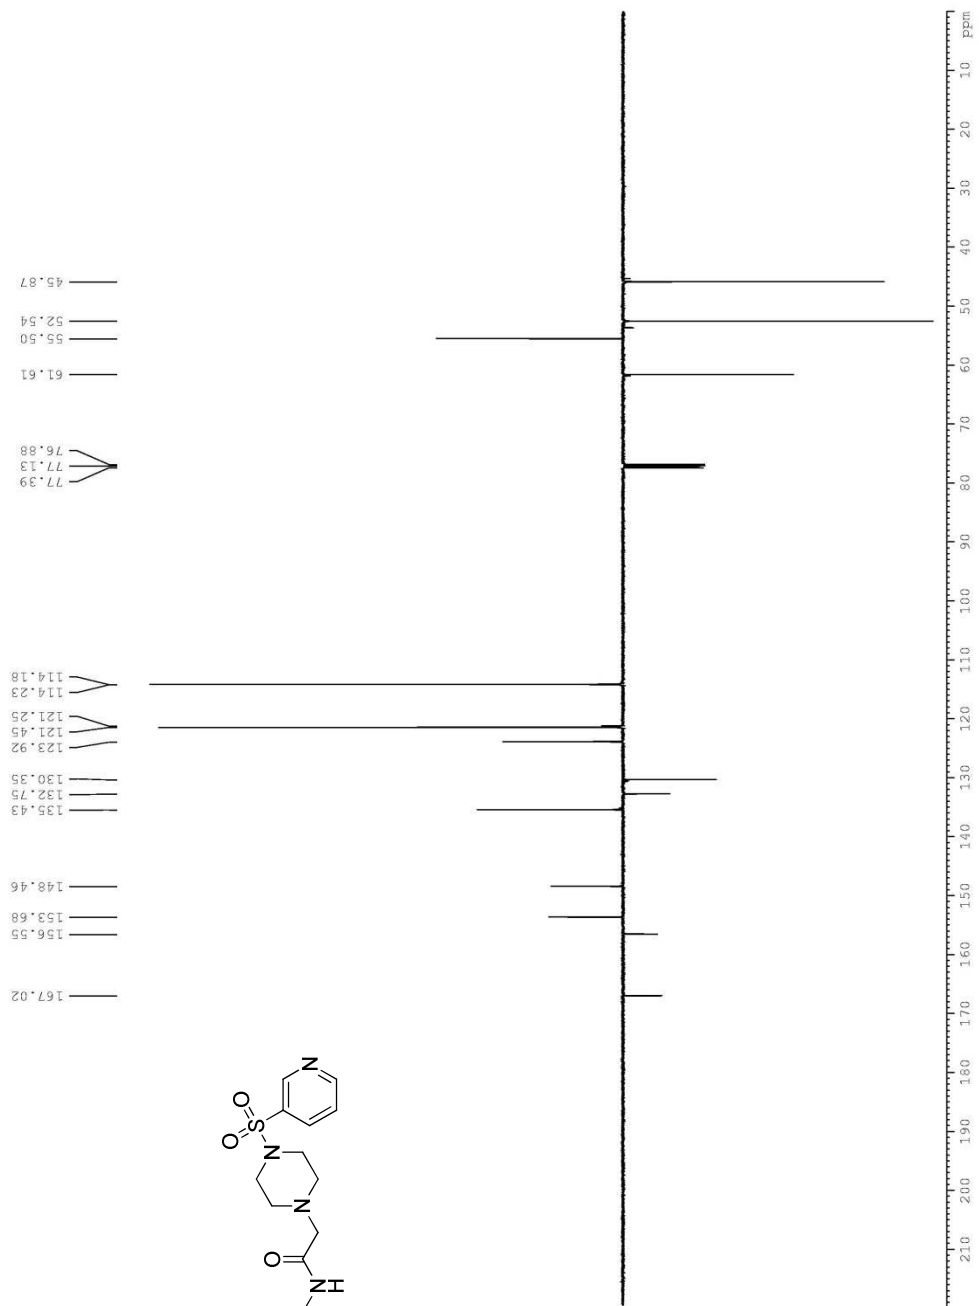

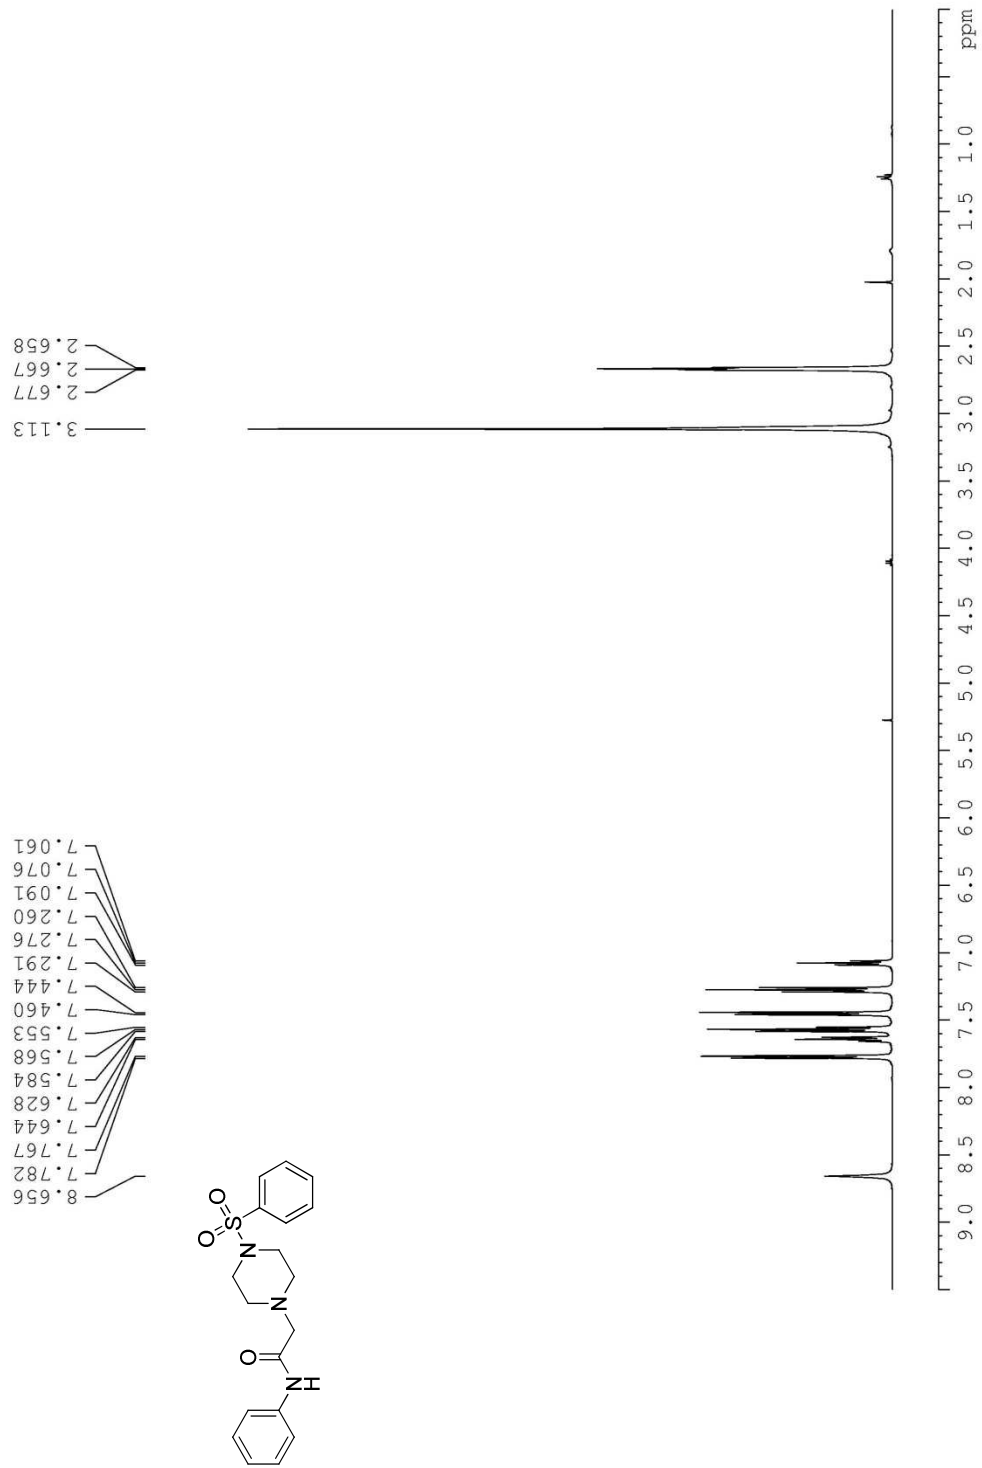

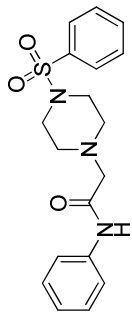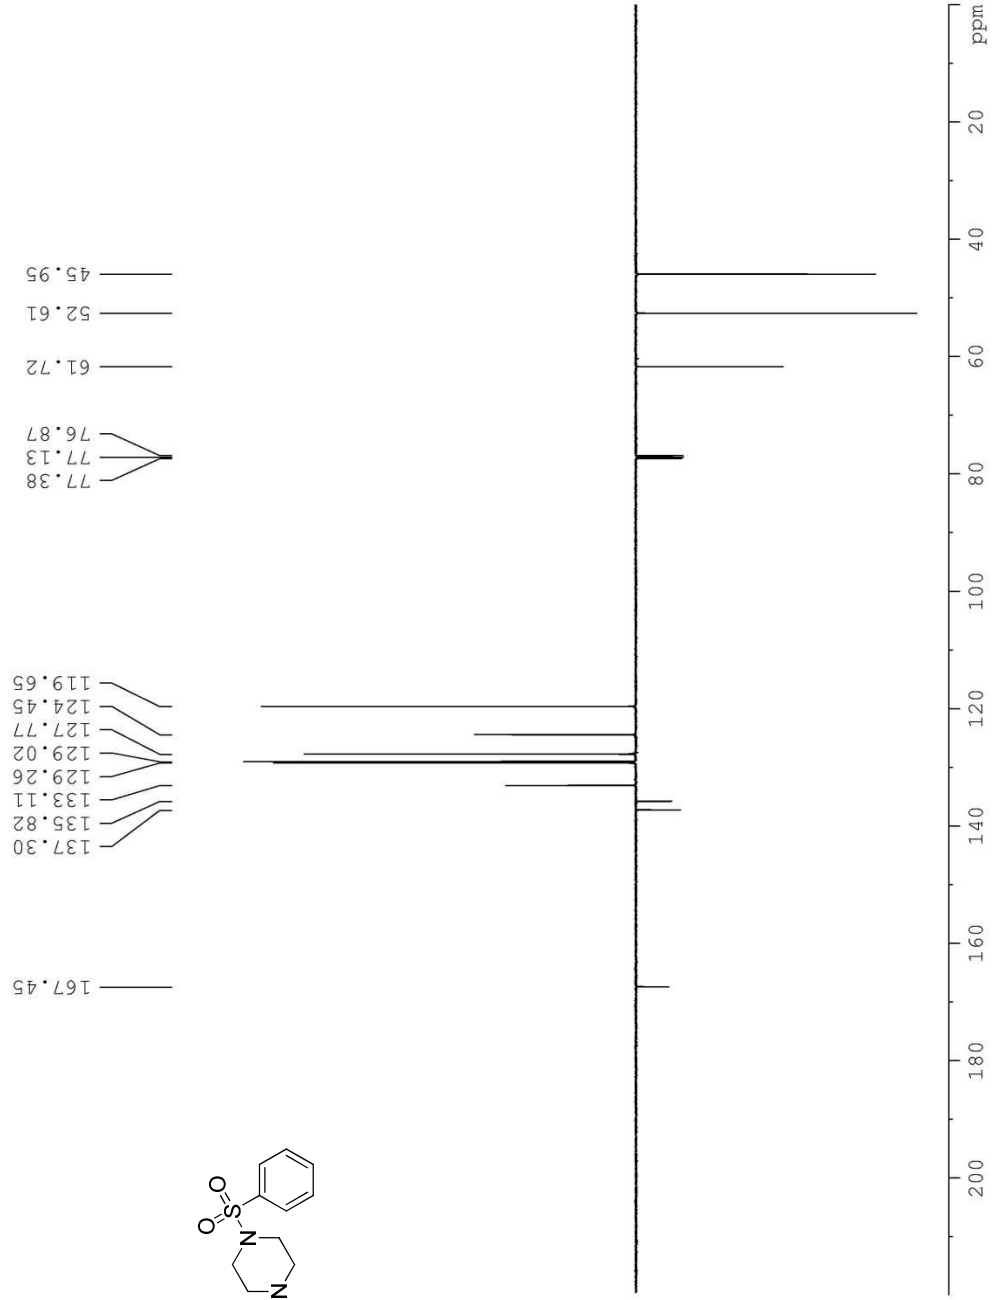



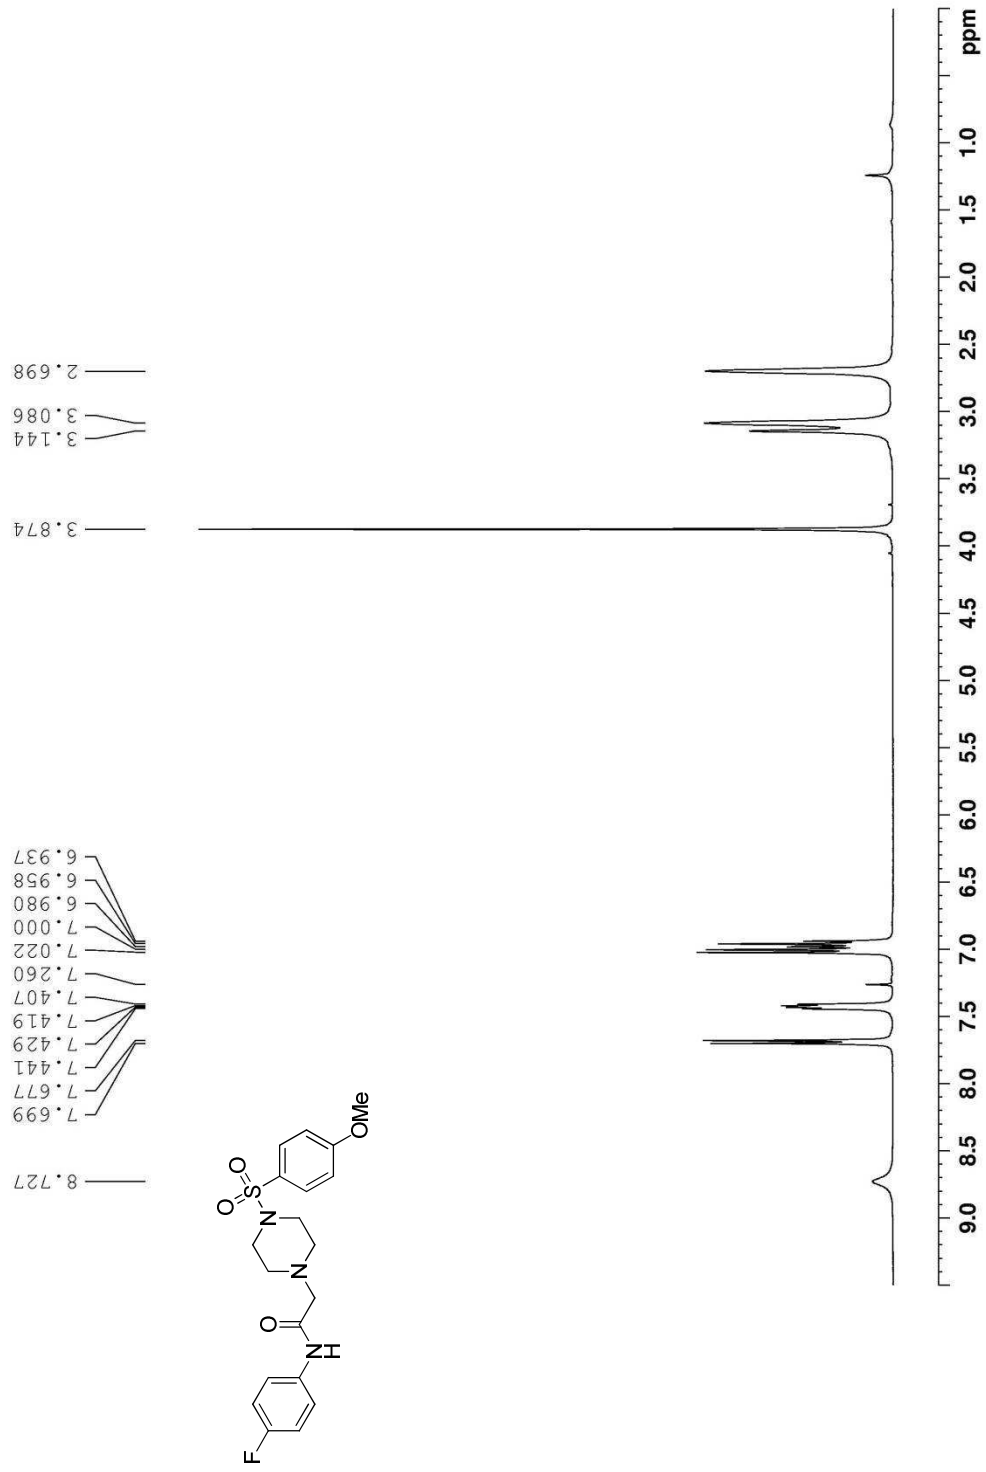

<sup>1</sup>H NMR (CDCl<sub>3</sub>, 500 MHz) of **28**.

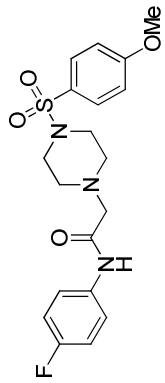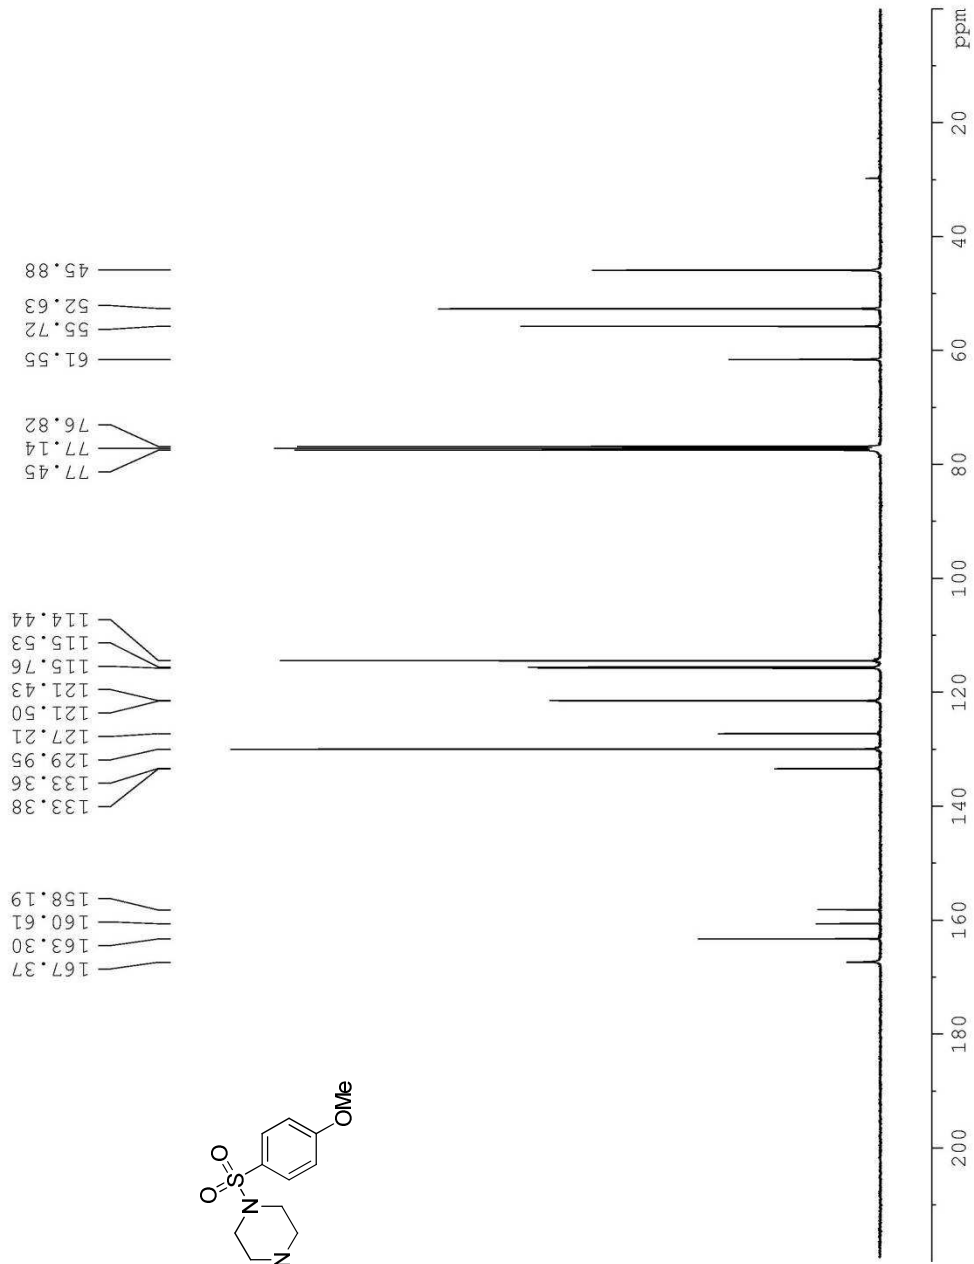

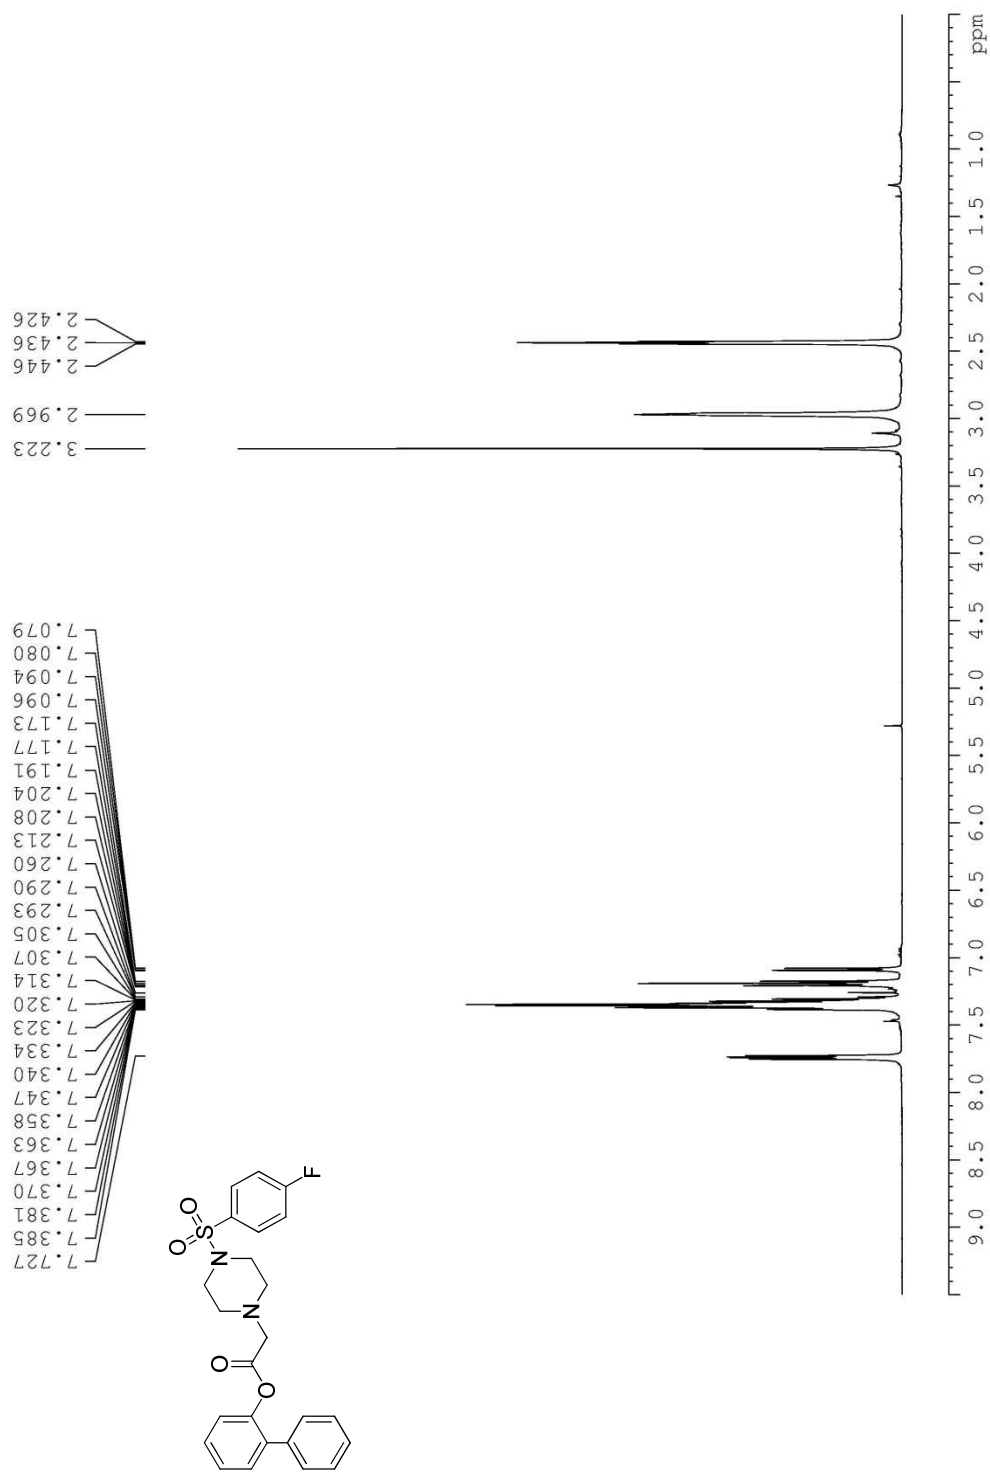

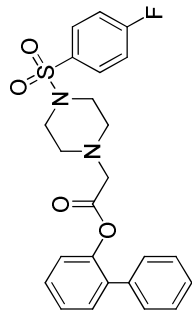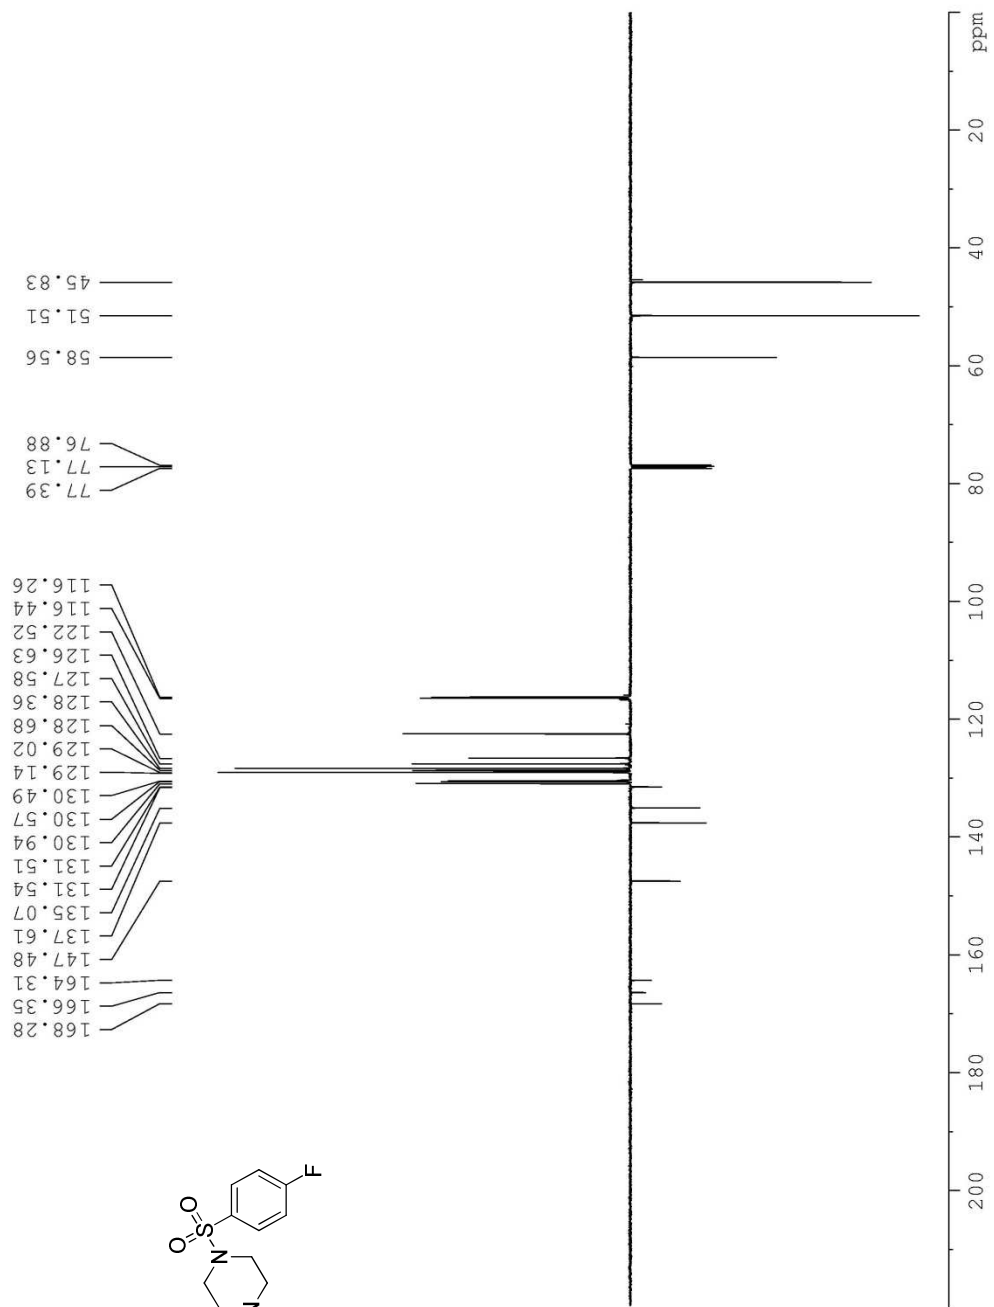

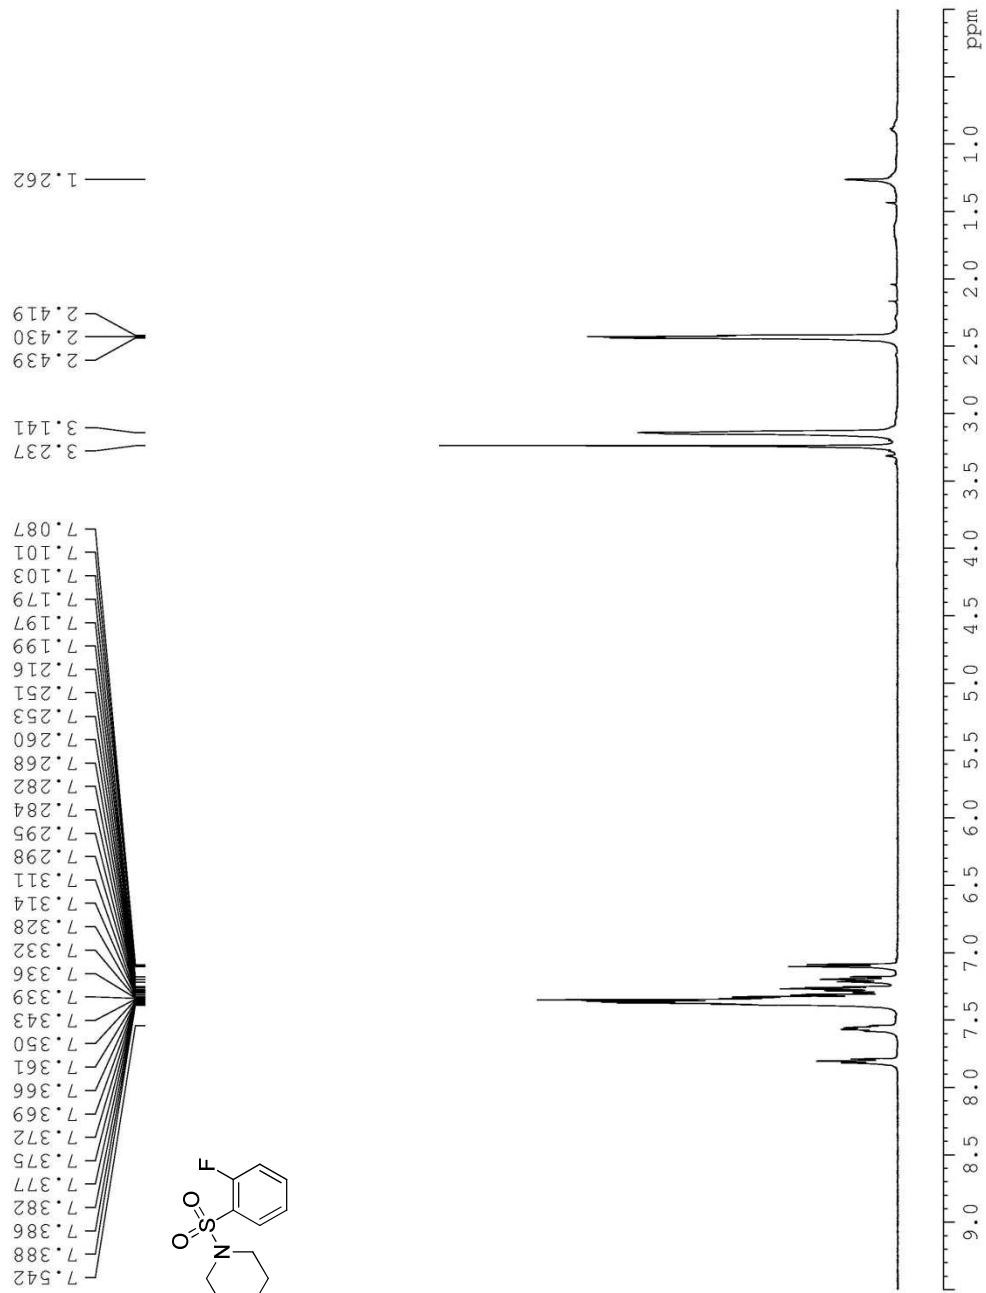

<sup>1</sup>H NMR (CDCl<sub>3</sub>, 500 MHz) of **30**.

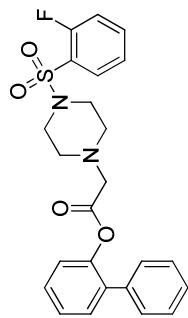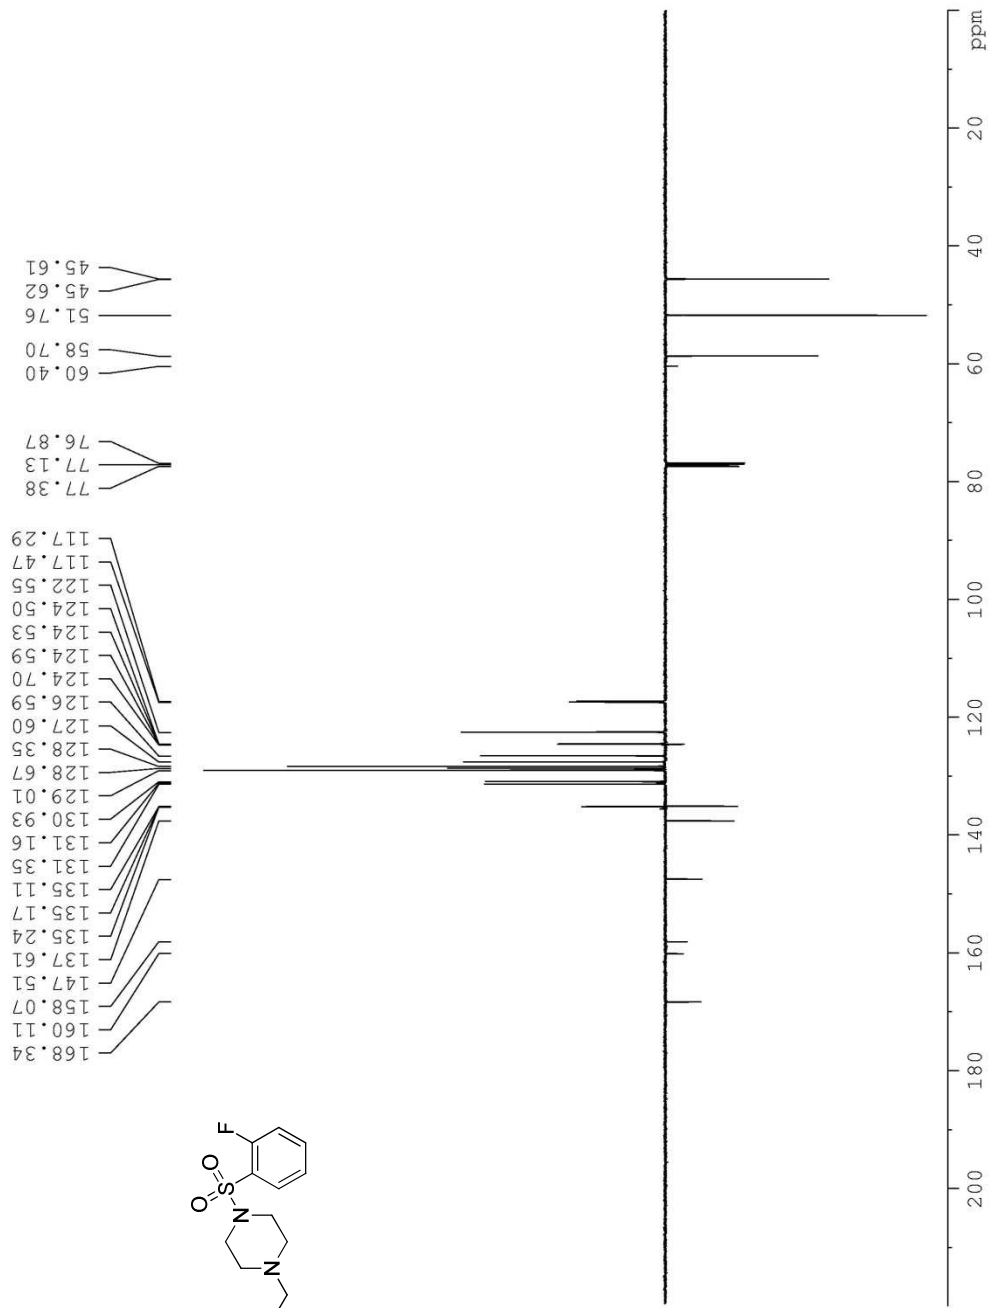

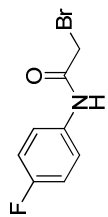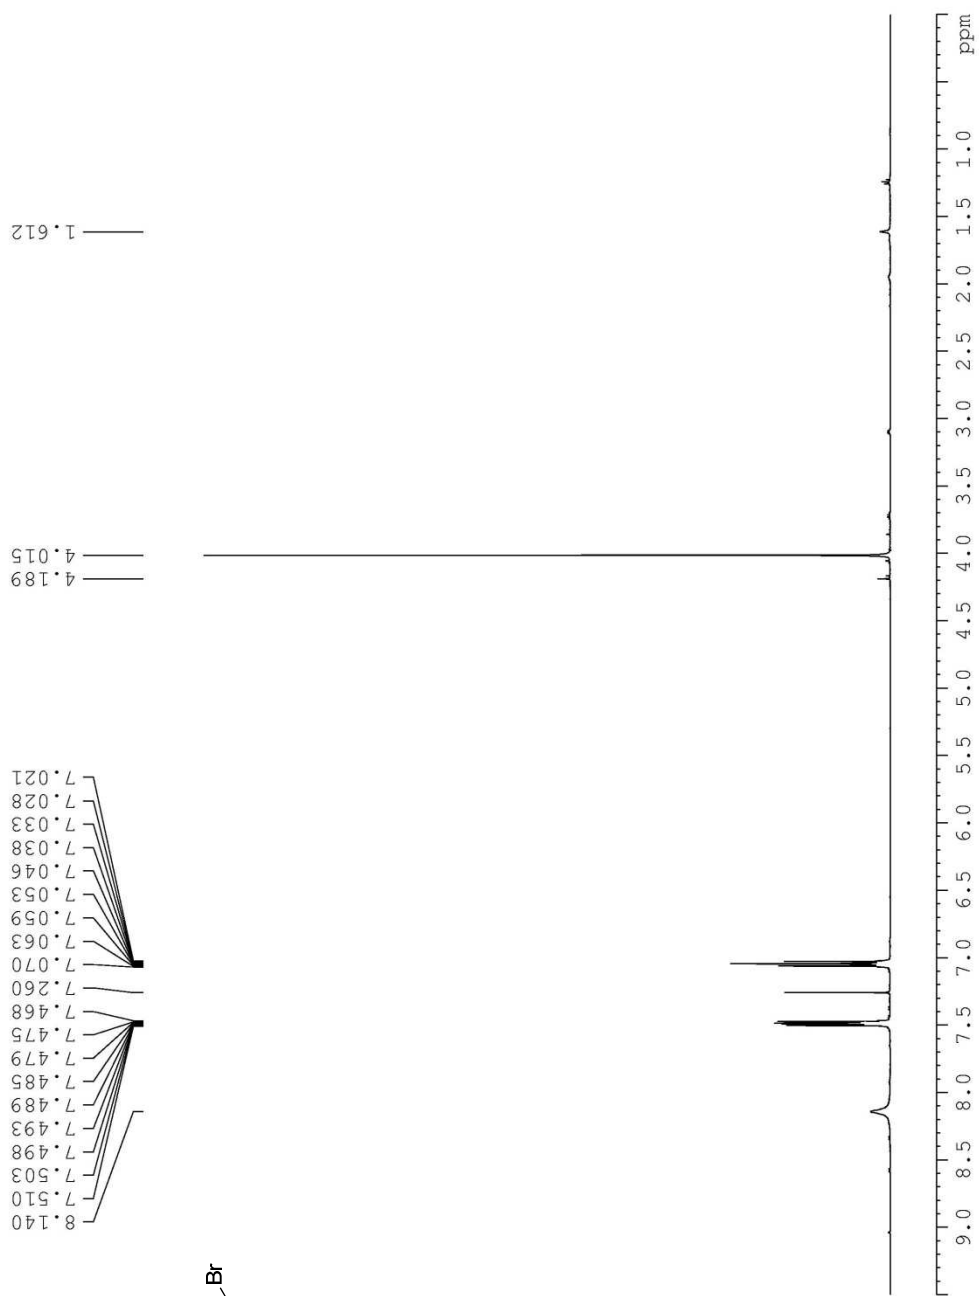

<sup>1</sup>H NMR (CDCl<sub>3</sub>, 500 MHz) of **S1**.

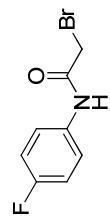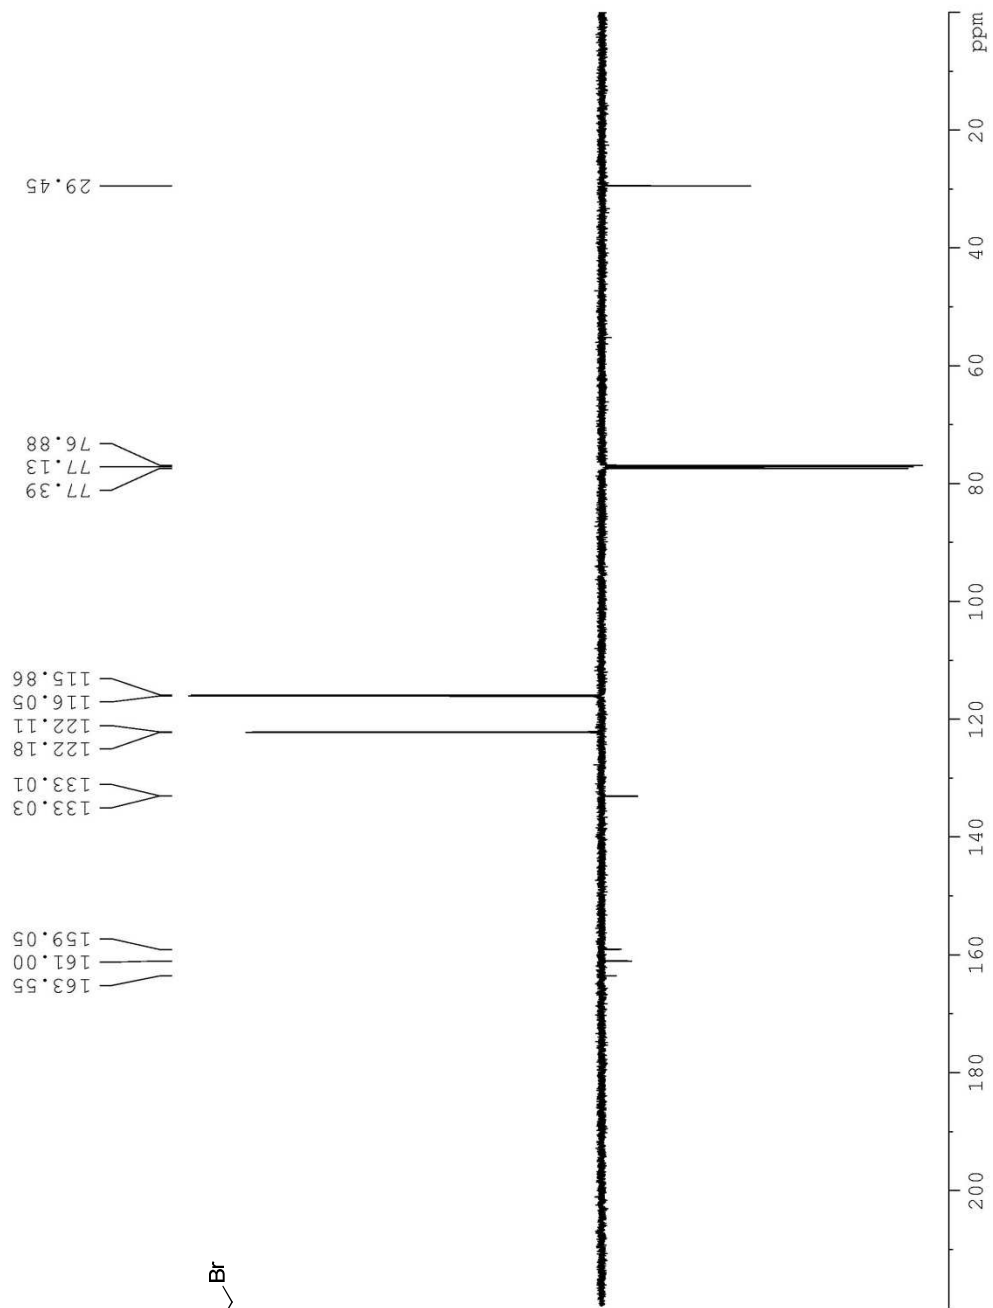



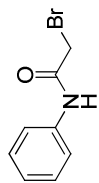

8.169  
7.536  
7.521  
7.370  
7.355  
7.339  
7.260  
7.182  
7.167  
7.153

4.015

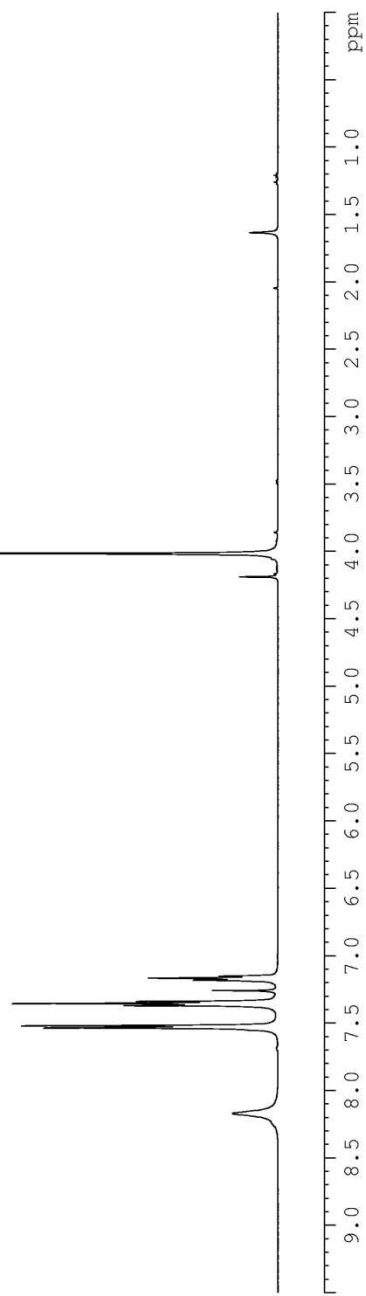

<sup>1</sup>H NMR (CDCl<sub>3</sub>, 400 MHz) of **S2**.

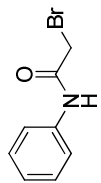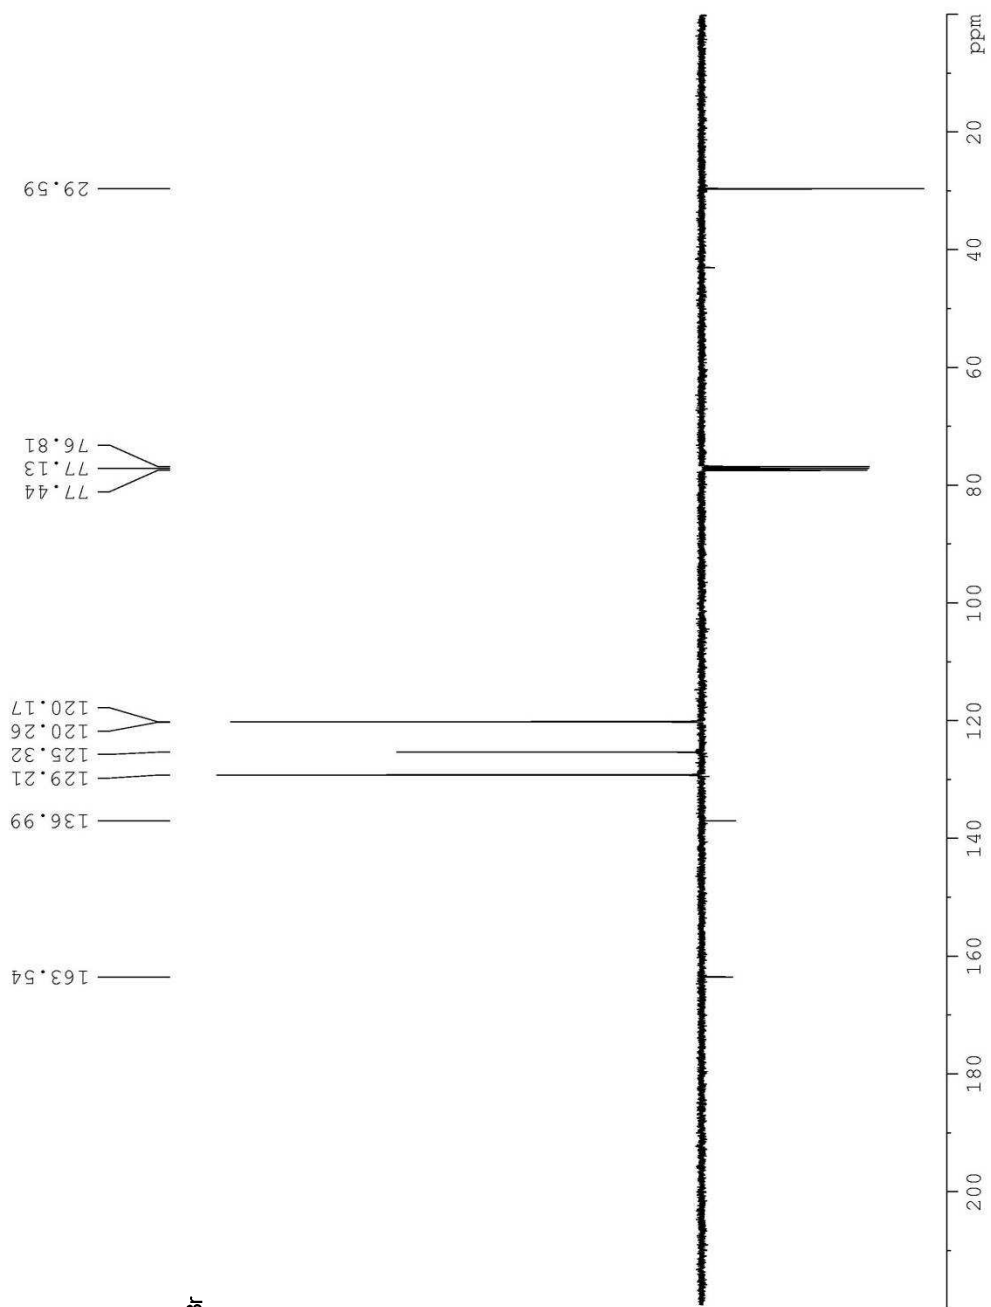

$^{13}\text{C}$  NMR (CDCl<sub>3</sub>, 101 MHz) of **S2**.

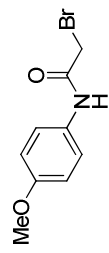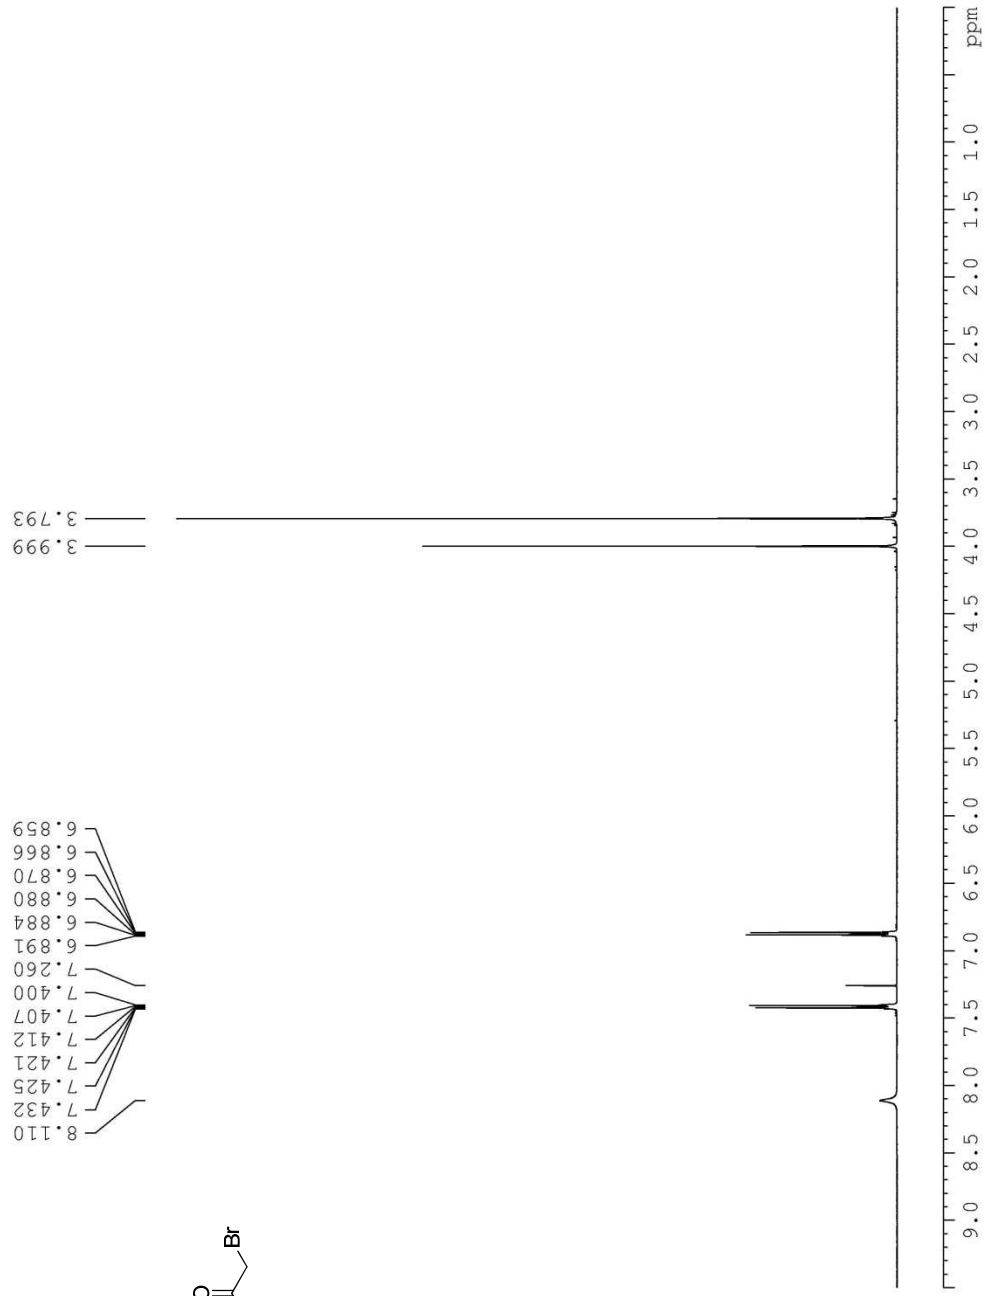

<sup>1</sup>H NMR (CDCl<sub>3</sub>, 500 MHz) of S3.

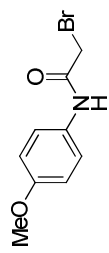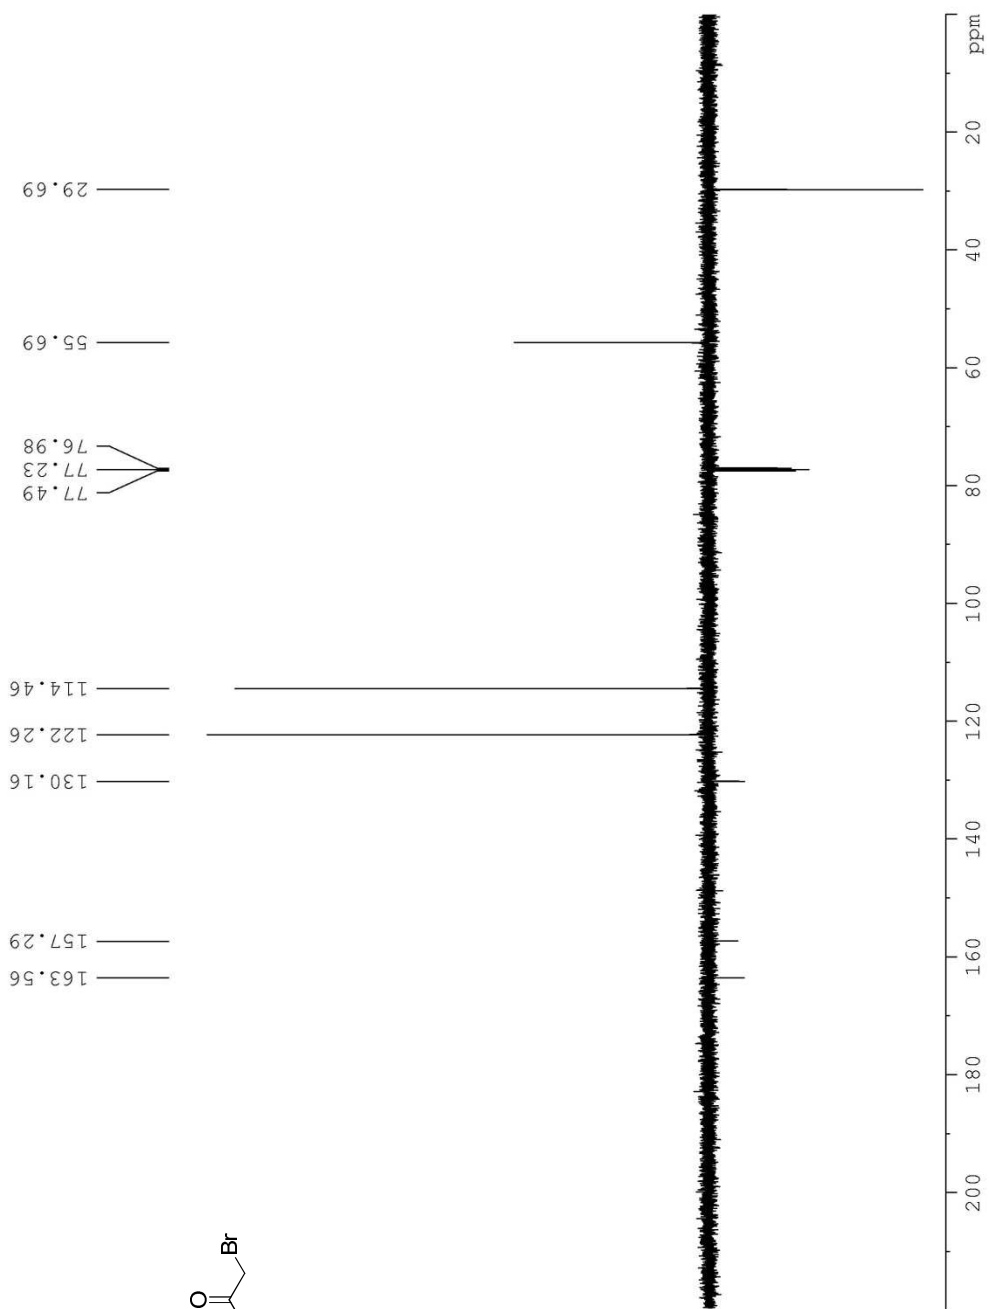

$^{13}\text{C}$  NMR (CDCl<sub>3</sub>, 126 MHz) of S3.

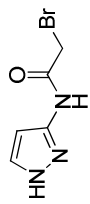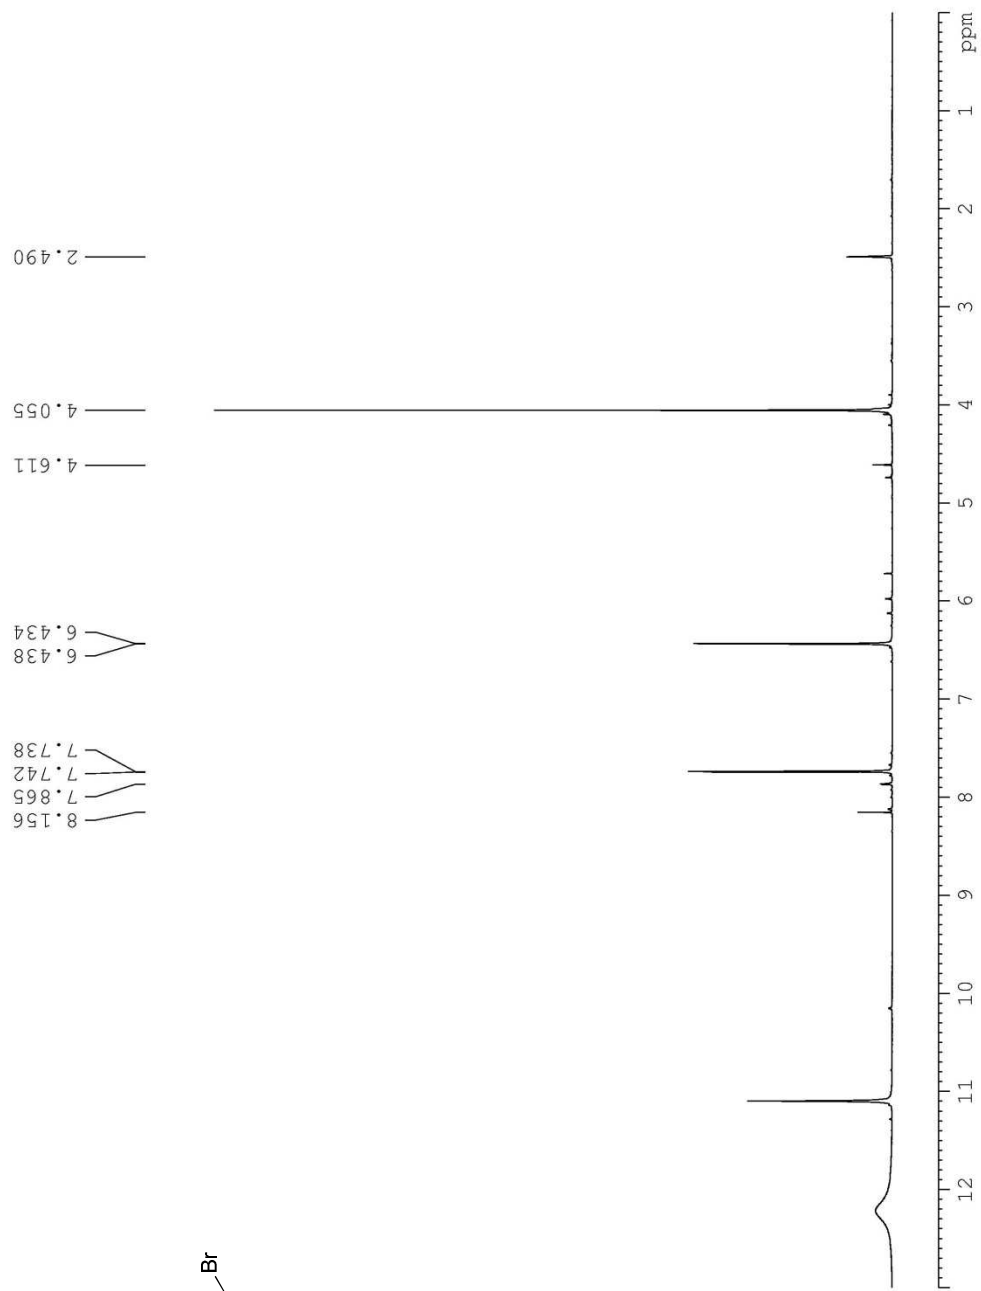

<sup>1</sup>H NMR (DMSO-d<sub>6</sub>, 500 MHz) of S4.

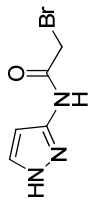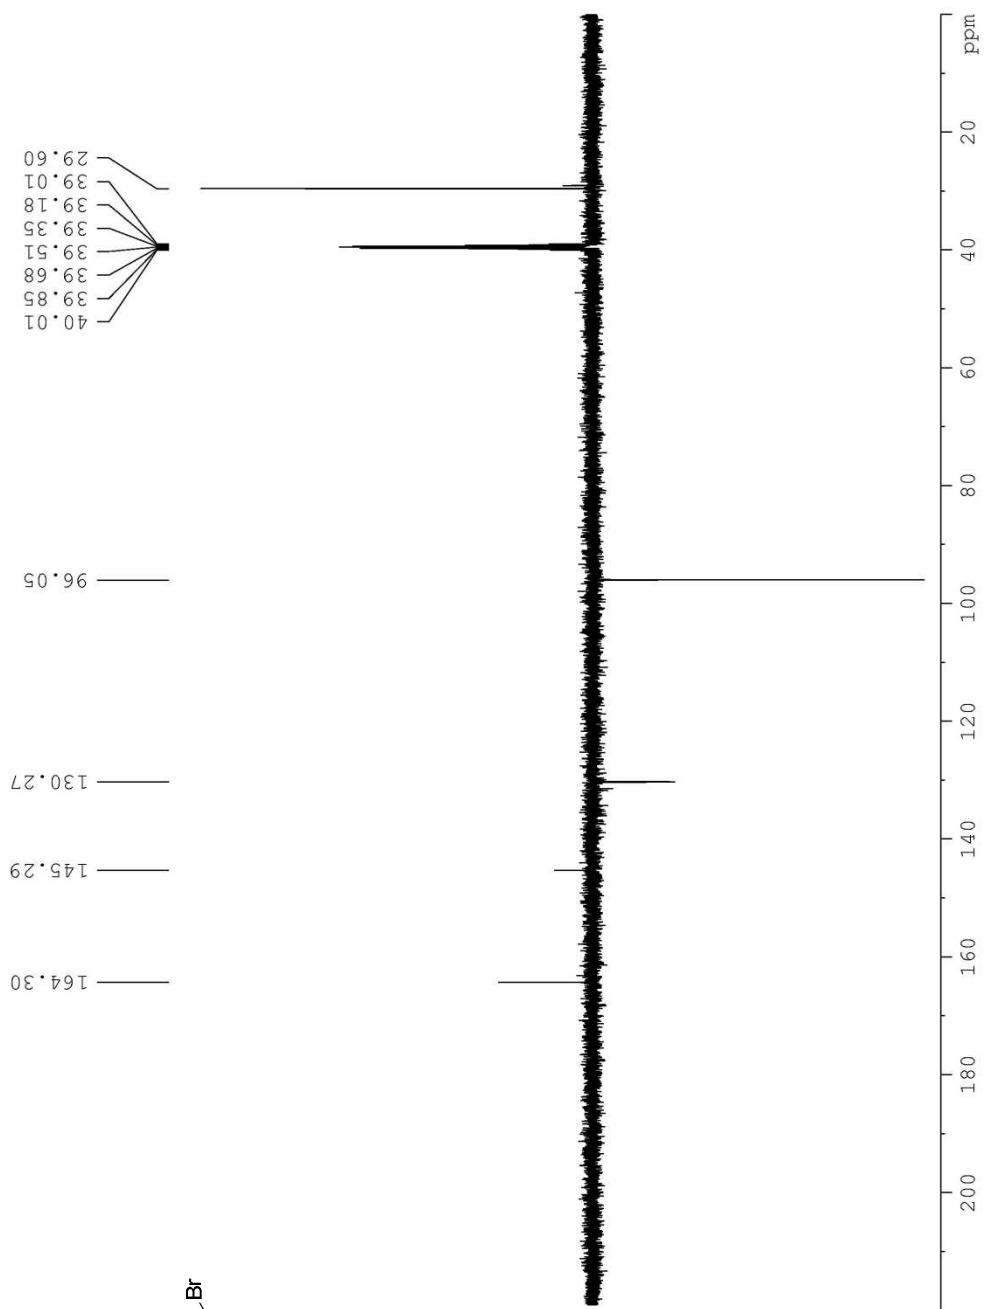

<sup>13</sup>C NMR (DMSO-d<sub>6</sub>, 126 MHz) of S4.

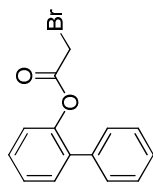

7.508  
7.502  
7.496  
7.493  
7.478  
7.475  
7.467  
7.463  
7.451  
7.448  
7.443  
7.437  
7.432  
7.421  
7.406  
7.403  
7.260  
7.244

3.874

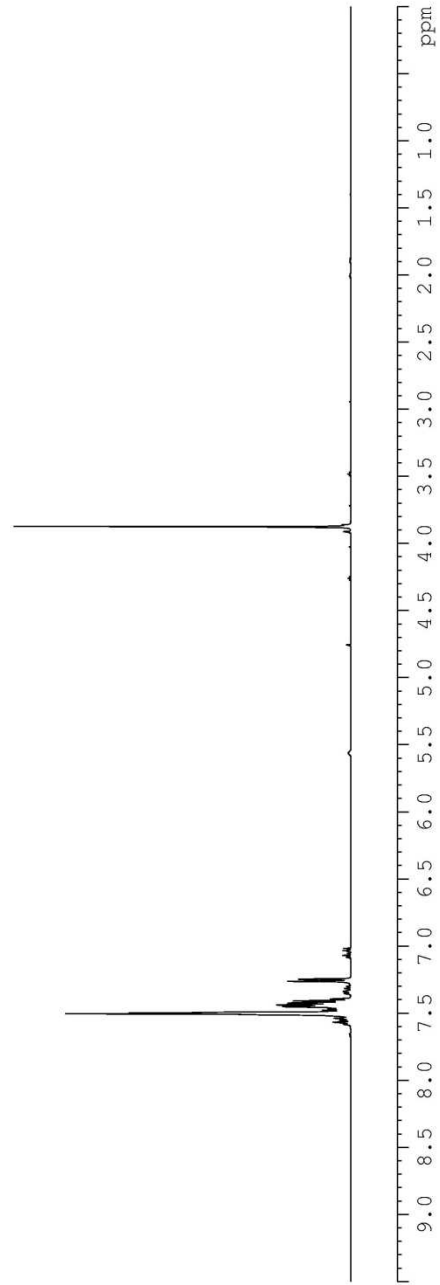

<sup>1</sup>H NMR (CDCl<sub>3</sub>, 400 MHz) of **S5**.

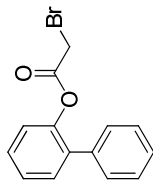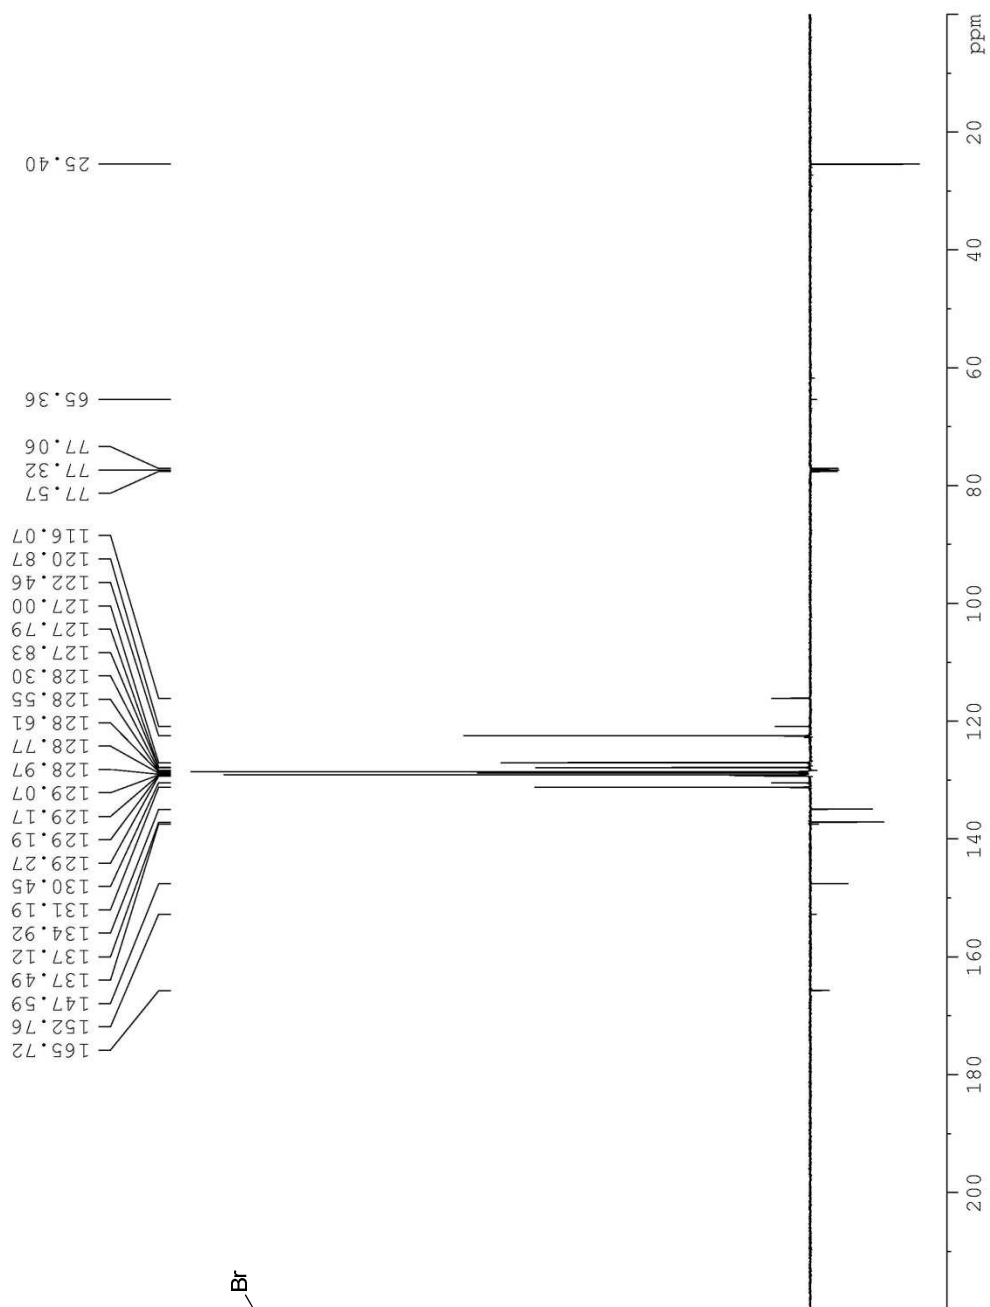



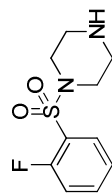

7.782  
7.777  
7.763  
7.745  
7.741  
7.560  
7.556  
7.547  
7.541  
7.529  
7.527  
7.525  
7.516  
7.508  
7.504  
7.260  
7.253  
7.234  
7.214  
7.189  
7.168  
7.165  
7.143

3.102  
3.093  
3.081  
2.871  
2.859  
2.846

1.649

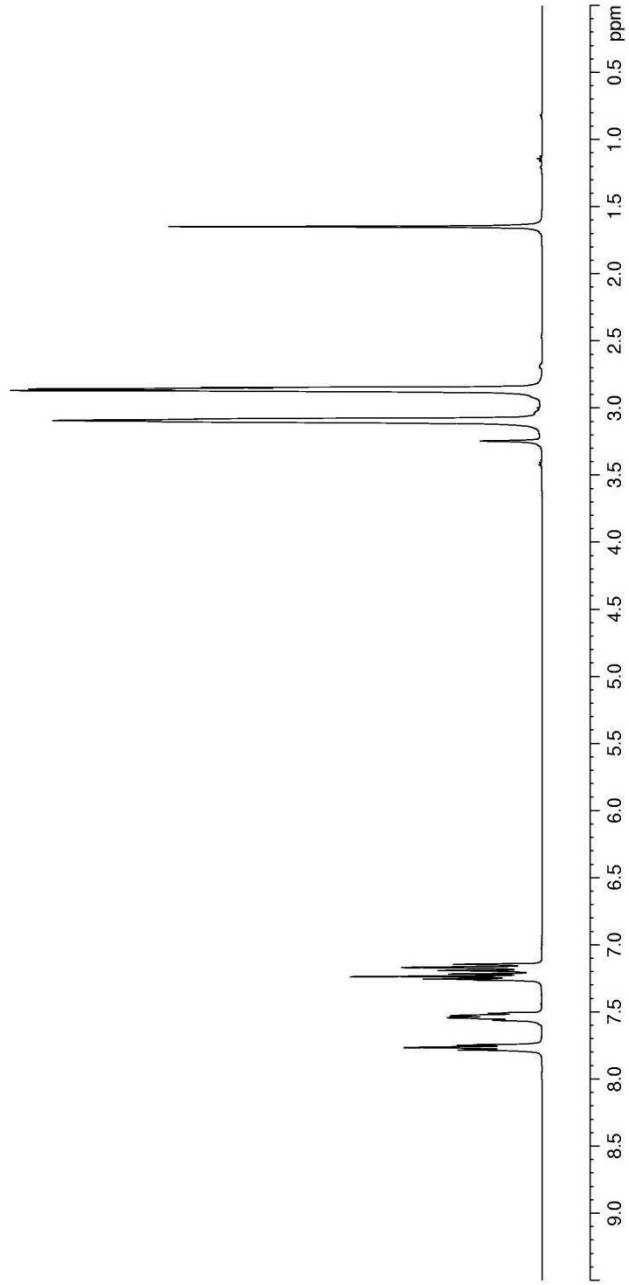

$^1\text{H}$  NMR ( $\text{CDCl}_3$ , 400 MHz) of **S6**.

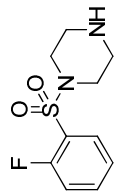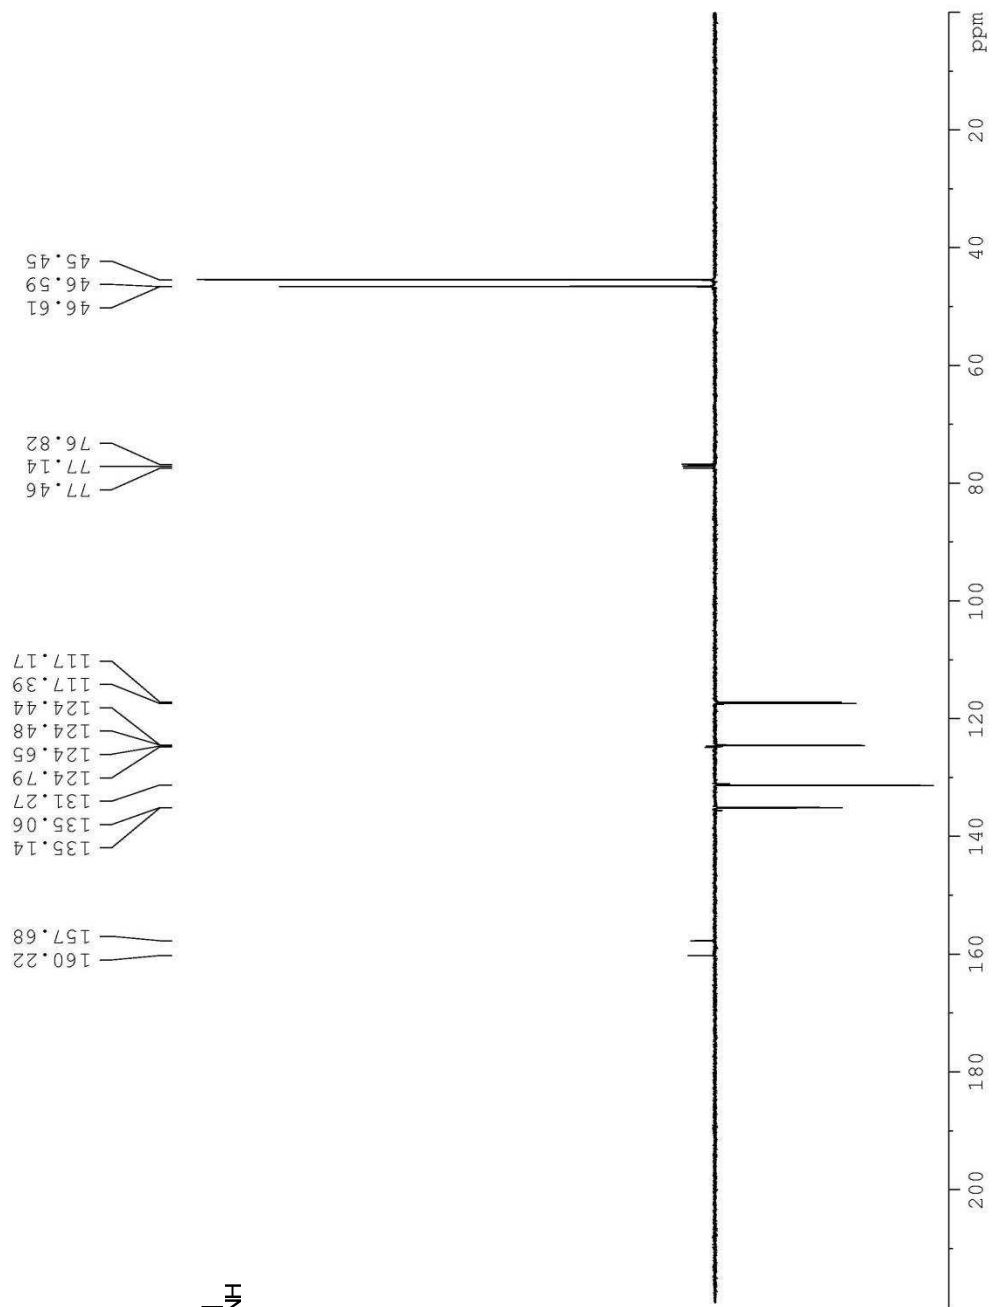

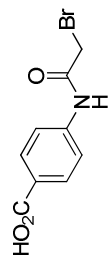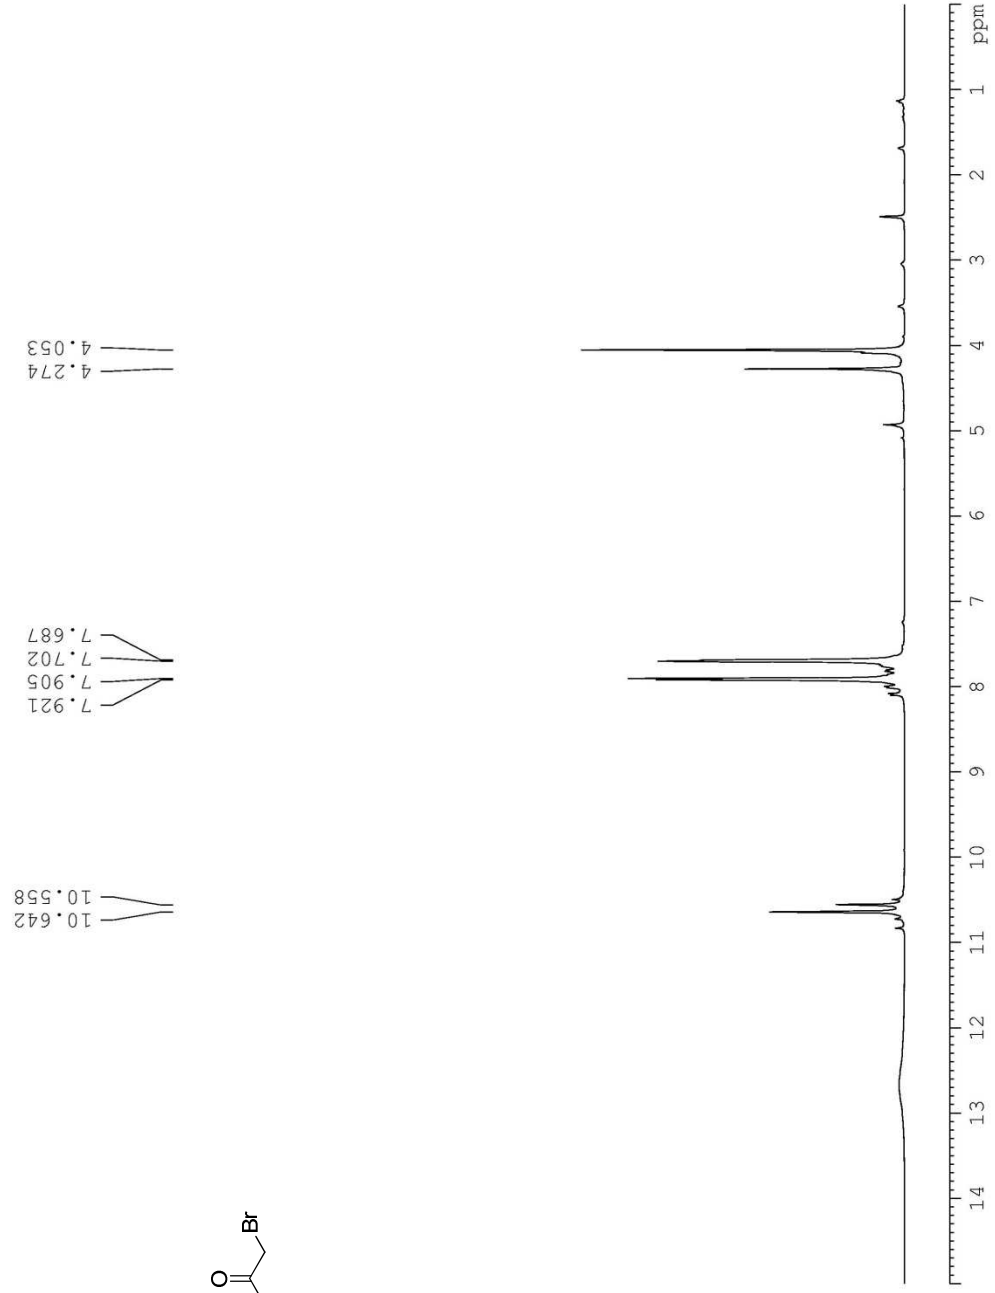

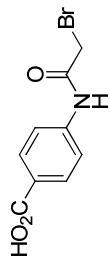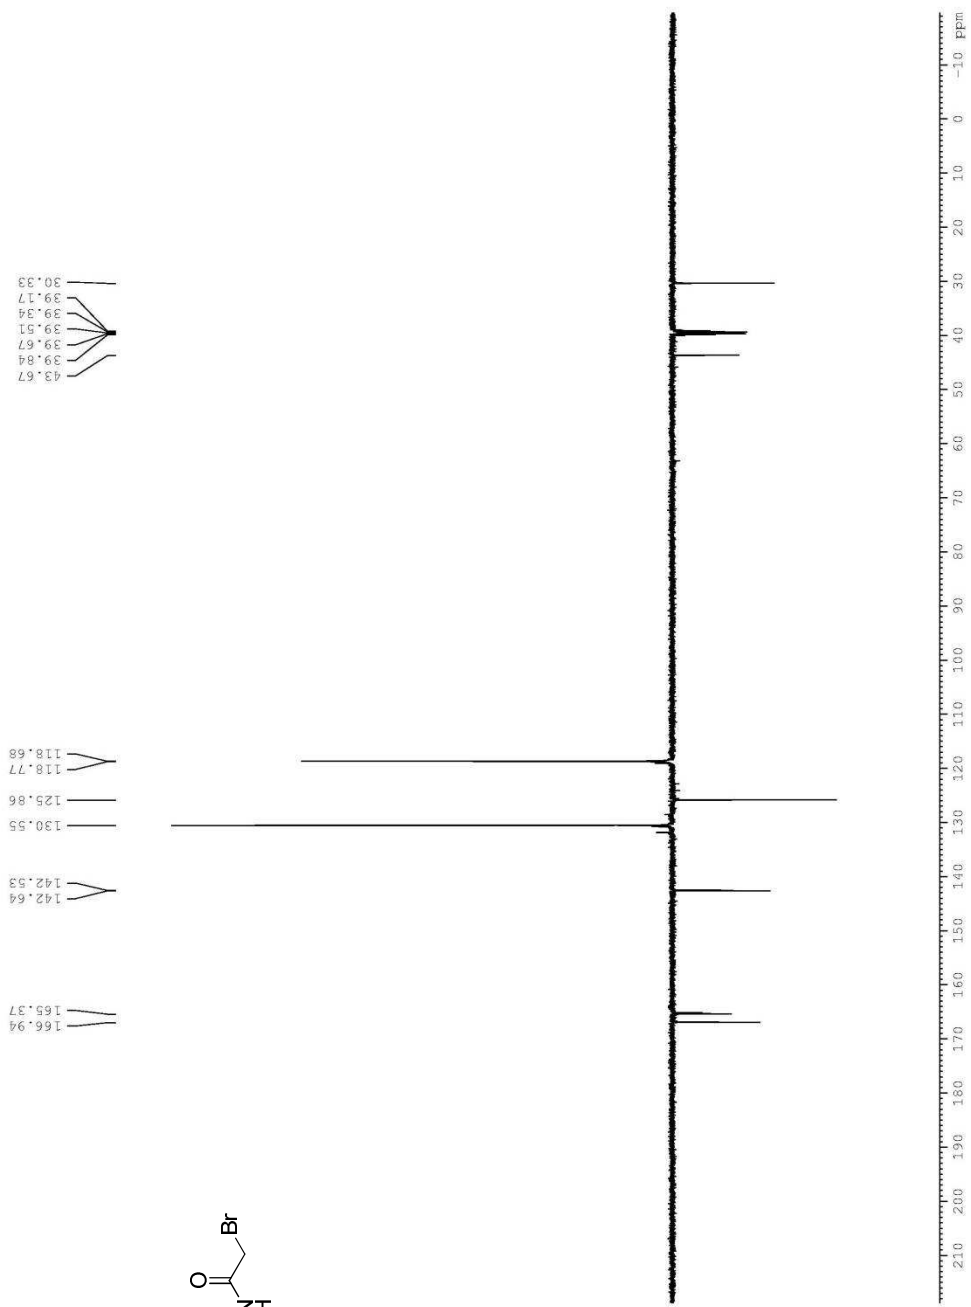

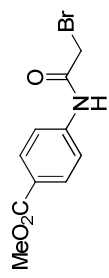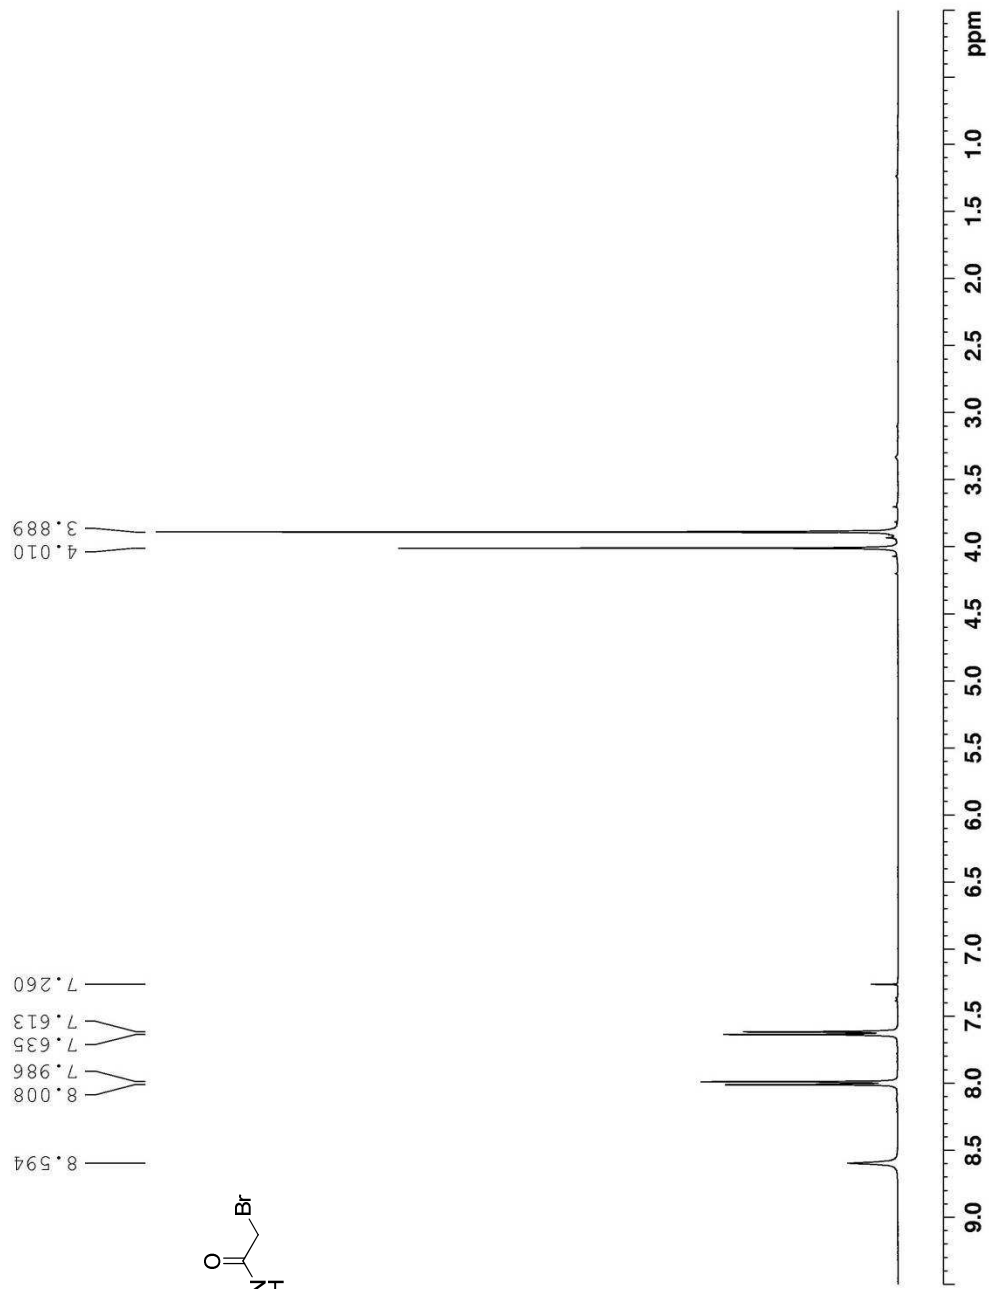

<sup>1</sup>H NMR (CDCl<sub>3</sub>, 400 MHz) of **S8**.

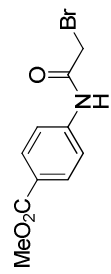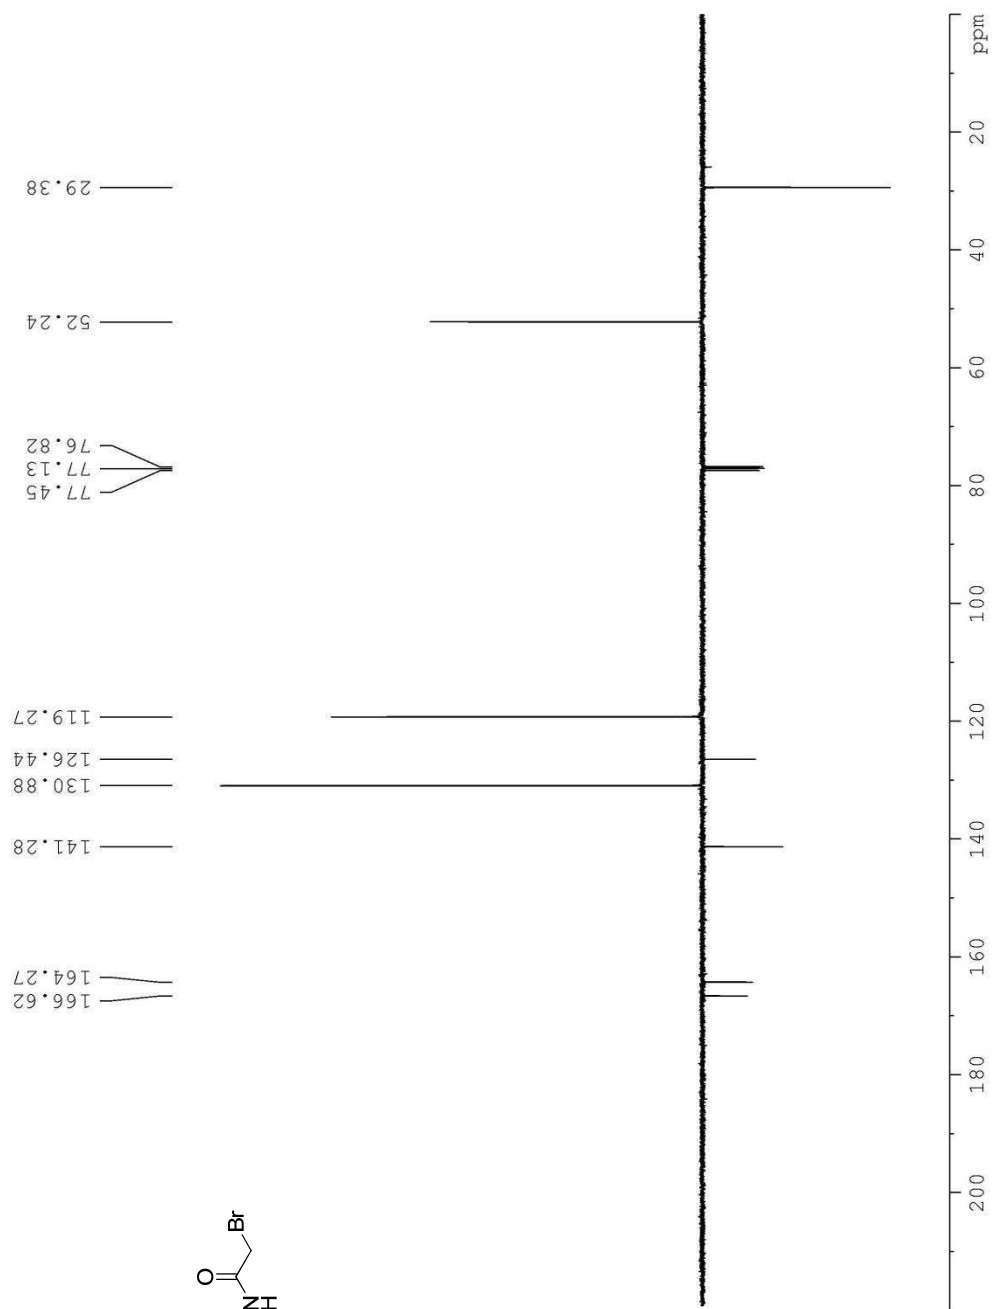

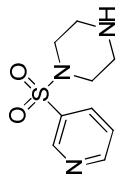

3.002  
2.987  
2.978  
2.968  
2.931  
2.914  
2.889  
2.878  
2.869  
2.848  
2.819  
2.536  
2.526  
2.515  
2.502  
2.492  
2.476  
2.467  
2.457  
2.128

8.778  
8.776  
8.769  
8.766  
8.000  
7.996  
7.992  
7.984  
7.980  
7.976  
7.963  
7.960  
7.956  
7.461  
7.452  
7.444  
7.436  
7.427  
7.260

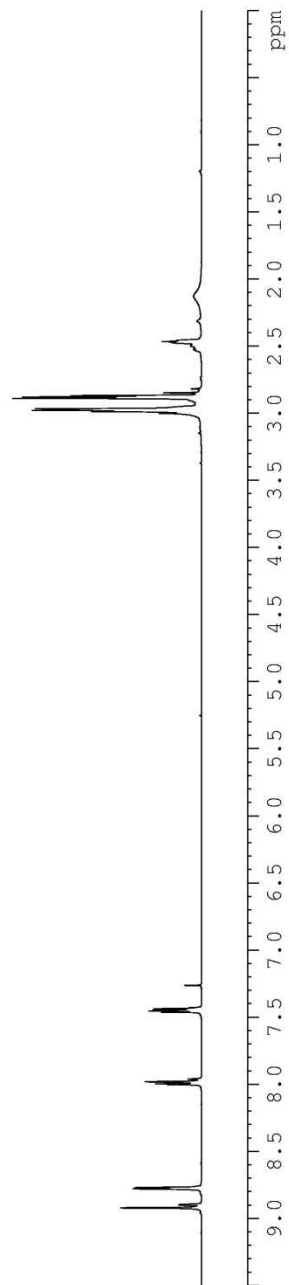

<sup>1</sup>H NMR (CDCl<sub>3</sub>, 500 MHz) of **S9**.

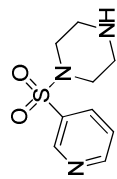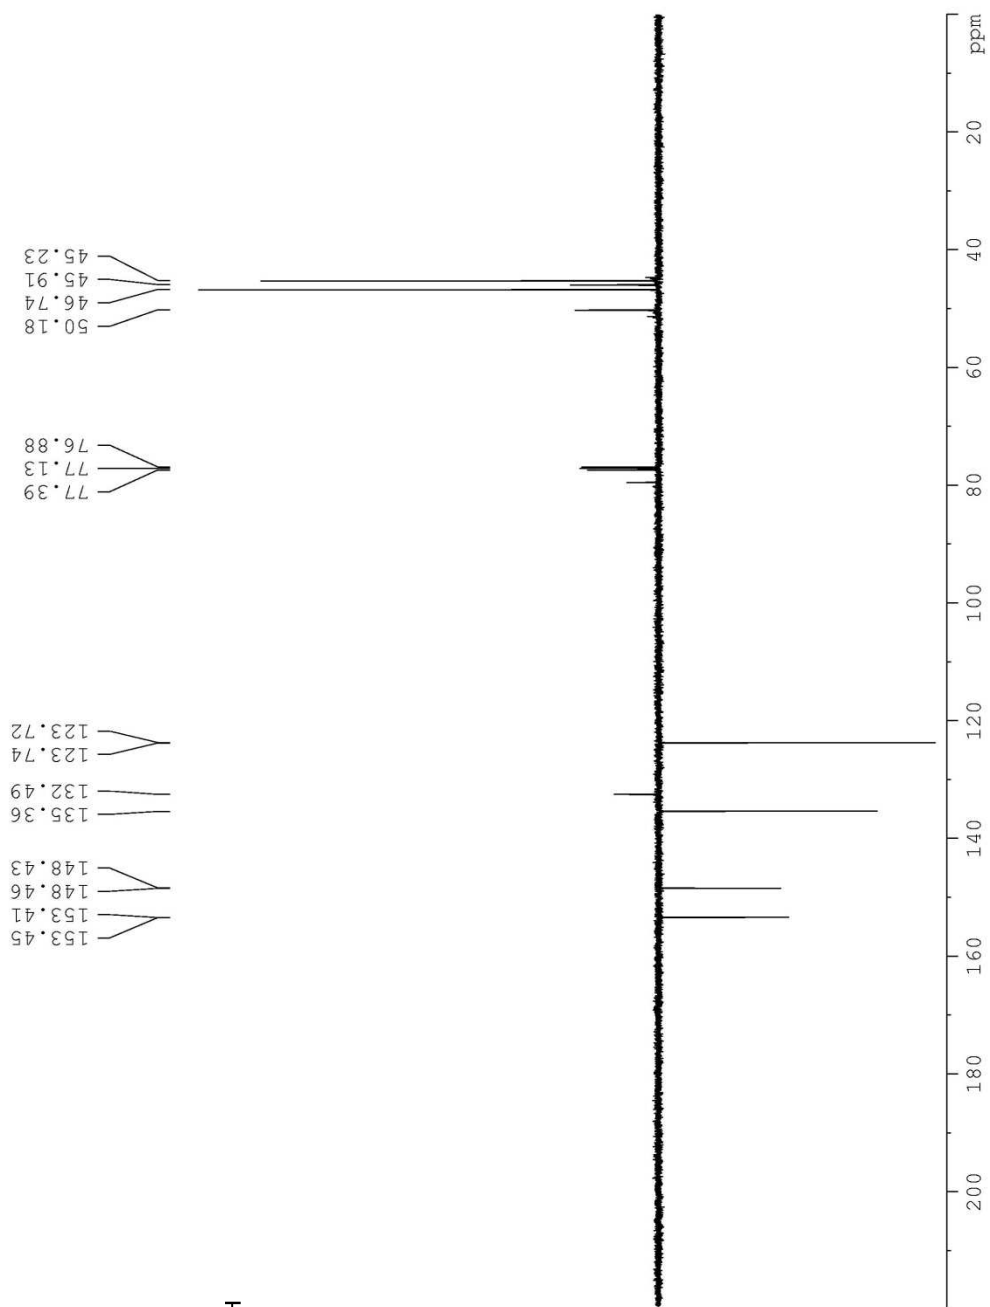



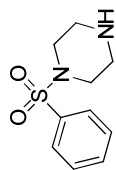

7.701  
7.687  
7.562  
7.549  
7.535  
7.497  
7.483  
7.469

2.927  
2.857

1.846

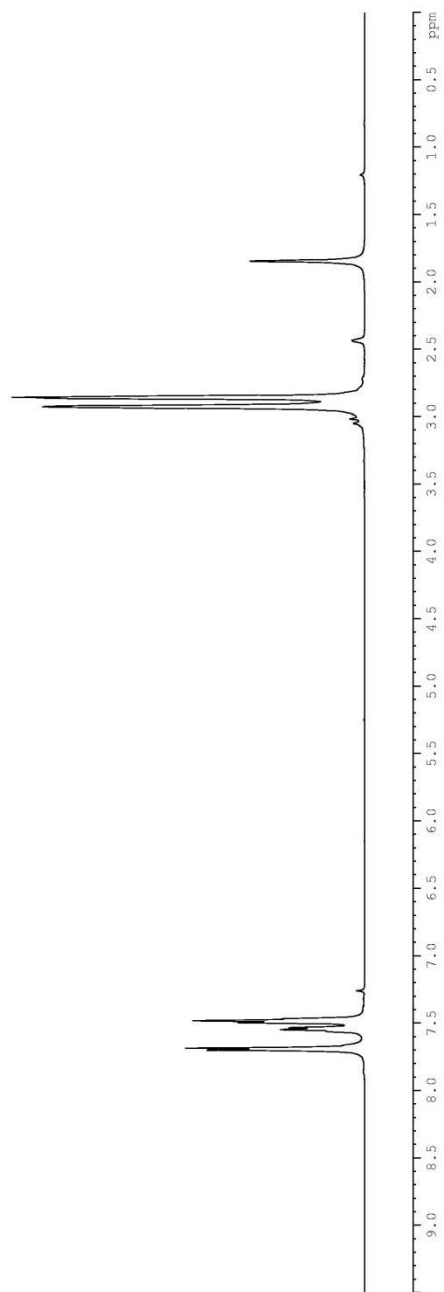

<sup>1</sup>H NMR (CDCl<sub>3</sub>, 400 MHz) of **S10**.

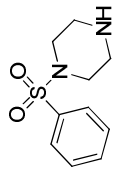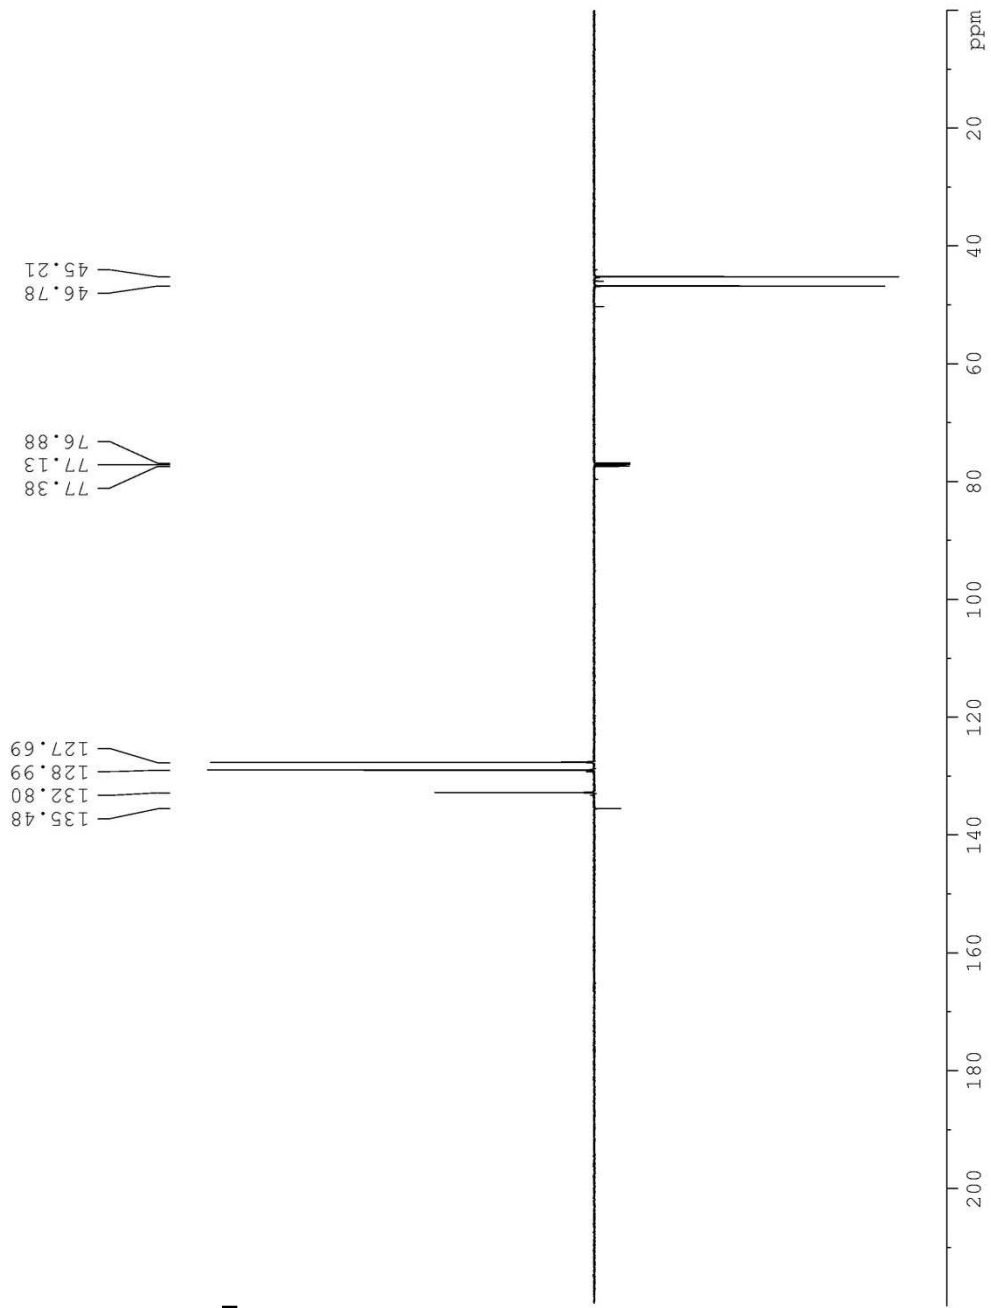

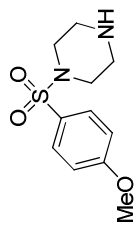

7.606  
7.601  
7.588  
7.583  
7.576  
7.561  
6.932  
6.927  
6.922  
6.915  
6.910  
6.902  
6.900

3.796  
3.788

2.865  
2.853  
2.833  
2.824  
2.819  
2.812  
2.808

1.808

S75

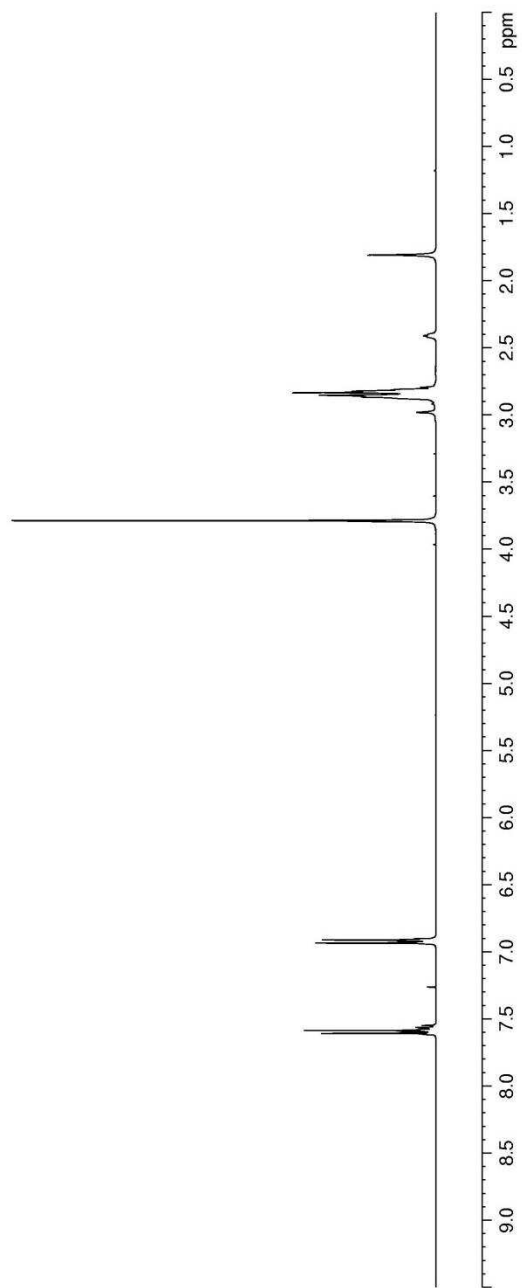

<sup>1</sup>H NMR (CDCl<sub>3</sub>, 500 MHz) of **S11**.

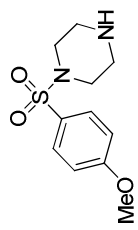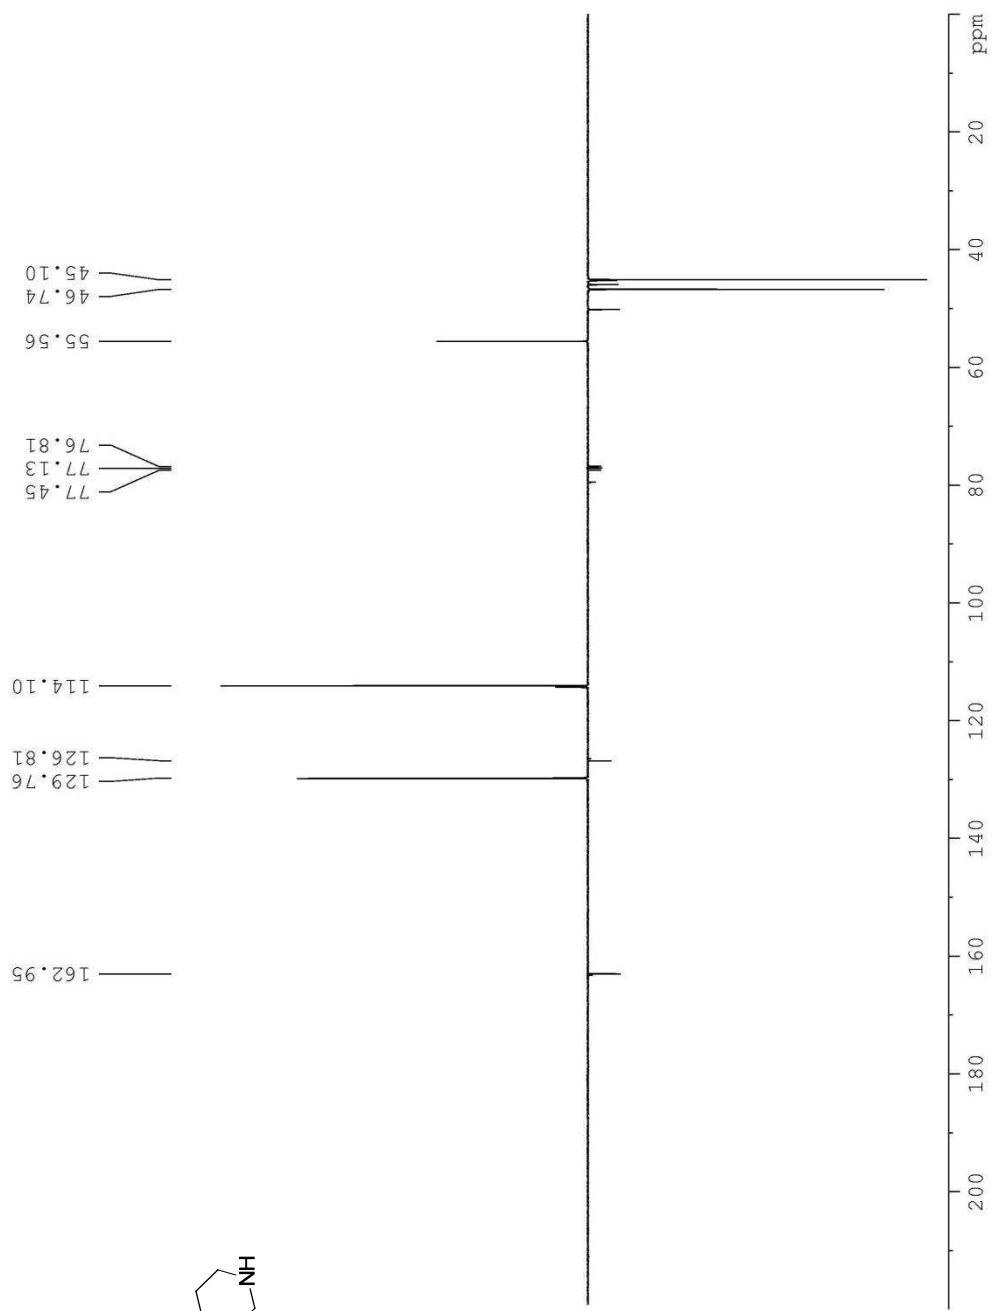

<sup>13</sup>C NMR (CDCl<sub>3</sub>, 126 MHz) of **S11**.
